# Supplementary material for: Needs of people with rare diseases that can be supported by electronic resources: a scoping review
Source: PubMed Central journal article supplement — BMJ Open. 2022 Sep 1;12(9):e060394. doi: 10.1136/bmjopen-2021-060394 (PMC9438091; doi:10.1136/bmjopen-2021-060394), 2022-09-01
Supplement: bmjopen-2021-060394.draft_revisions.pdf [file bmjopen-2021-060394.draft_revisions.pdf]

# BMJ Open

BMJ Open is committed to open peer review. As part of this commitment we make the peer review history of every article we publish publicly available.

When an article is published we post the peer reviewers' comments and the authors' responses online. We also post the versions of the paper that were used during peer review. These are the versions that the peer review comments apply to.

The versions of the paper that follow are the versions that were submitted during the peer review process. They are not the versions of record or the final published versions. They should not be cited or distributed as the published version of this manuscript.

BMJ Open is an open access journal and the full, final, typeset and author-corrected version of record of the manuscript is available on our site with no access controls, subscription charges or pay-per-view fees (<http://bmjopen.bmj.com>).

If you have any questions on BMJ Open's open peer review process please email [info.bmjopen@bmj.com](mailto:info.bmjopen@bmj.com)

# BMJ Open

## Needs of people with rare diseases that can be supported by electronic resources: a scoping review

|                               |                                                                                                                                                                                                                                                                                                                                                                                                                                                                                                                                                                                                                                                                                                                                                                                                                                |
|-------------------------------|--------------------------------------------------------------------------------------------------------------------------------------------------------------------------------------------------------------------------------------------------------------------------------------------------------------------------------------------------------------------------------------------------------------------------------------------------------------------------------------------------------------------------------------------------------------------------------------------------------------------------------------------------------------------------------------------------------------------------------------------------------------------------------------------------------------------------------|
| Journal:                      | <i>BMJ Open</i>                                                                                                                                                                                                                                                                                                                                                                                                                                                                                                                                                                                                                                                                                                                                                                                                                |
| Manuscript ID                 | bmjopen-2021-060394                                                                                                                                                                                                                                                                                                                                                                                                                                                                                                                                                                                                                                                                                                                                                                                                            |
| Article Type:                 | Original research                                                                                                                                                                                                                                                                                                                                                                                                                                                                                                                                                                                                                                                                                                                                                                                                              |
| Date Submitted by the Author: | 23-Dec-2021                                                                                                                                                                                                                                                                                                                                                                                                                                                                                                                                                                                                                                                                                                                                                                                                                    |
| Complete List of Authors:     | Long, Janet; Macquarie University, Australian Institute of Health Innovation<br>Best, Stephanie; Macquarie University, Australian Institute of Health Innovation; Murdoch Childrens Research Institute, Australian Genomics<br>Nic Giolla Easpaig, Bróna; Macquarie University, Australian Institute of Health Innovation<br>Hatem, Sarah; Macquarie University, Australian Institute of Health Innovation<br>Fehlberg, Zoe; Macquarie University, Australian Institute of Health Innovation; Murdoch Children's Research Institute, Australian Genomics Health Alliance<br>Christodoulou, John; Murdoch Childrens Research Institute, Brain and Mitochondrial Research Group; The University of Melbourne, Department of Paediatrics<br>Braithwaite, Jeffrey; Macquarie University, Australian Institute of Health Innovation |
| Keywords:                     | Quality in health care < HEALTH SERVICES ADMINISTRATION & MANAGEMENT, Organisation of health services < HEALTH SERVICES ADMINISTRATION & MANAGEMENT, Health & safety < HEALTH SERVICES ADMINISTRATION & MANAGEMENT                                                                                                                                                                                                                                                                                                                                                                                                                                                                                                                                                                                                             |
|                               |                                                                                                                                                                                                                                                                                                                                                                                                                                                                                                                                                                                                                                                                                                                                                                                                                                |

SCHOLARONE™  
Manuscripts

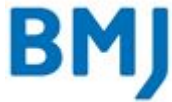

I, the Submitting Author has the right to grant and does grant on behalf of all authors of the Work (as defined in the below author licence), an exclusive licence and/or a non-exclusive licence for contributions from authors who are: i) UK Crown employees; ii) where BMJ has agreed a CC-BY licence shall apply, and/or iii) in accordance with the terms applicable for US Federal Government officers or employees acting as part of their official duties; on a worldwide, perpetual, irrevocable, royalty-free basis to BMJ Publishing Group Ltd ("BMJ") its licensees and where the relevant Journal is co-owned by BMJ to the co-owners of the Journal, to publish the Work in this journal and any other BMJ products and to exploit all rights, as set out in our [licence](#).

The Submitting Author accepts and understands that any supply made under these terms is made by BMJ to the Submitting Author unless you are acting as an employee on behalf of your employer or a postgraduate student of an affiliated institution which is paying any applicable article publishing charge ("APC") for Open Access articles. Where the Submitting Author wishes to make the Work available on an Open Access basis (and intends to pay the relevant APC), the terms of reuse of such Open Access shall be governed by a Creative Commons licence – details of these licences and which [Creative Commons](#) licence will apply to this Work are set out in our licence referred to above.

Other than as permitted in any relevant BMJ Author's Self Archiving Policies, I confirm this Work has not been accepted for publication elsewhere, is not being considered for publication elsewhere and does not duplicate material already published. I confirm all authors consent to publication of this Work and authorise the granting of this licence.

1  
2  
3  
4  
5 1 Needs of people with rare diseases that can be supported by  
6  
7  
8  
9 2 electronic resources: a scoping review  
10  
11  
12  
13  
14 3

15  
16 4 Janet C Long\*<sup>1</sup>

17  
18  
19 5 Stephanie Best<sup>1,2</sup>

20  
21  
22 6 Brona Nic Giolla Easpaig<sup>1</sup>

23  
24  
25 7 Sarah Hatem<sup>1</sup>

26  
27  
28 8 Zoe Fehlberg<sup>1,2</sup>

29  
30  
31 9 John Christodoulou<sup>3</sup>

32  
33  
34 10 Jeffrey Braithwaite<sup>1</sup>

35  
36  
37 11 <sup>1</sup> Australian Institute of Health Innovation, Macquarie University, Australia

38  
39  
40 12 <sup>2</sup> Australian Genomics Health Alliance, Murdoch Children's Research Institute, Melbourne, Australia.

41  
42  
43 13 <sup>3</sup> Department of Paediatrics, Murdoch Children's Research Institute, University of Melbourne,  
44 Melbourne, Australia

45  
46  
47 15 \*Corresponding author

48  
49  
50 16 [Janet.long@mq.edu.au](mailto:Janet.long@mq.edu.au)

51  
52  
53 17  
54  
55  
56  
57  
58  
59  
60

## 18 Abstract

### 19 Objectives:

20 Rare diseases are characterised by low incidence, often with little evidence for effective treatments.  
21 Isolated patients and specialist centres for rare diseases are increasingly connected thanks to the  
22 internet. This scoping review aimed to identify issues facing people with a rare disease that authors  
23 report may be addressed by electronic resources (mobile applications, websites, social media  
24 platforms, telehealth and online portals).

### 25 Methods:

26 Guided by the PRISMA-ScR guidelines, peer-reviewed literature was searched using terms for rare  
27 disease (incidence <1:2,000), electronic modalities (e.g., mobile phone) and patient support terms.  
28 Medline, Embase and PsycInfo were searched, supplemented by hand searches of selected journals,  
29 in July 2021. Conference abstracts were included.

### 30 Results:

31 The search found 383 papers. After screening there were 72 papers. Fifty-six electronic resources  
32 were described in 64 papers, while 12 papers were exploratory studies. Cystic fibrosis (n=28) was  
33 most frequently addressed, followed by haemophilia (n=16).  
34 Four domains and 23 subdomains of needs were extracted from the papers. The domains of needs  
35 were: support for self-management, access to high-quality information, access to appropriate  
36 specialist services, and social support. Subdomains sometimes related to needs of individual rare  
37 diseases (e.g., social isolation due to infection risk in people with cystic fibrosis). Fifteen electronic  
38 resources were identified that supported parents of children with rare disorders.

### 39 Conclusions:

40 While it can be argued that rare diseases per se may be no less distressing or onerous to care for  
41 than a high prevalence disease, rare diseases have unique features: the lengthy odyssey to find a

1  
2  
3 42 diagnosis, then appropriate specialists, the lack of evidence around effective treatments, guidelines,  
4  
5 43 or access to knowledgeable general health service providers. Designers of electronic resources are  
6  
7 44 urged to consult key stakeholders to enhance the effectiveness and usability of resources for people  
8  
9 45 with a rare disease.  
10  
11  
12  
13 46  
14  
15  
16 47  
17  
18

## 19 48 Article summary

### 23 49 Strengths and limitations of this study

- 26 50 • As global pooling of data from patients with a rare disease is made possible through the  
27  
28 51 internet it is timely to scope how electronic resources are changing the support available for  
29  
30  
31 52 this cohort.
- 33 53 • Needs were mapped out across 21 different rare diseases or disease groups.
- 35 54 • Electronic resources found were categorised into mobile applications, social support  
36  
37 55 platforms, telehealth tools and online portals, and active (containing interactive content e.g.,  
38  
39 56 quizzes) and passive websites (information only).
- 42 57 • Individual named rare diseases/groups of diseases were included in the search terms to  
43  
44 58 overcome deficiencies of searching only using “rare diseases,” but could not cover all rare  
45  
46 59 diseases.

### 50 60 Key words

53 61 Rare disease, patient resources, patient empowerment, e-health, mobile apps  
54  
55  
56 62  
57  
58  
59  
60

## 63 Introduction

64 There are an estimated 6-7,000 different types of rare disease, many of them genetic.(1) We define  
65 a rare disease as a condition that has an incidence of less than 1 per 2,000 live births in the  
66 population.(1) Examples of rare diseases are Fragile X syndrome, haemophilia A, osteogenesis  
67 imperfecta, cystic fibrosis, spinal muscular atrophy type 1, and neurofibromatosis type 2. The low  
68 incidence of rare diseases mean that specifics of individual diseases are not covered in medical  
69 education programs which must prioritise more common conditions, and also that many health  
70 professionals will have never seen a case before.(2) Rare diseases are often difficult to diagnose,  
71 leading to the often described “diagnostic odyssey.”(3) The case has been made that even after this  
72 odyssey is concluded with a definitive diagnosis, the journey continues as people with a rare disease  
73 seek to access the best management care.(4)

74 Less than 5% of the estimated 7,000 rare diseases currently have an effective treatment.(1) The low  
75 numbers of cases of each rare disease means that evidence is often lacking to guide best practice.  
76 For example, CLN12 disease with an incidence of only 1 per million has too few people with the  
77 disease to set up a clinical trial to test the effectiveness of potential treatments or even map the  
78 “typical” progression of the disease.(5) Guidance on best practice must be determined through  
79 consensus recommendations of specialists in the condition(6, 7), which are often enhanced by the  
80 input of consumers who are living with the condition.(8)

81 A number of studies have explored the specific needs of people with a rare condition.(e.g., 9, 10, 11)  
82 Access to appropriate specialist services, finding a generalist health provider who is willing to learn  
83 about the condition, living with uncertainty of what is best practice and the trial and error nature of  
84 discovering it have all been reported.(e.g., 4)

85 Electronic resources, by which we mean mobile applications, websites, virtual monitoring devices,  
86 social media platforms, telehealth capability and online portals, hold promise of greater connectivity  
87 and collaboration in the field of rare diseases. Electronic resources are already being used to

1  
2  
3 88 improve understandings of rare diseases as national and international online registries, (e.g., 12, 13)  
4  
5 89 and virtual research consortiums (14, 15) pool their data and consolidate findings.  
6  
7

8 90 Electronic resources have a key role for people living with a rare disease. It is recognised that a  
9  
10 91 useful lever to accessing the best management care for people with a rare disease is empowerment,  
11  
12 92 in which people become knowledgeable about their illness and feel able to advocate for their  
13  
14 93 care.(16) Tools to foster empowerment are particularly relevant in this group and electronic  
15  
16 94 resources hold great promise to make information and resources more easily accessible.  
17  
18

19  
20 95 This paper aims to systematically scope the peer-reviewed literature to: (i) identify issues facing  
21  
22 96 people with a rare disease that authors report may be addressed by electronic resources, and (ii)  
23  
24 97 collate evidence around features of effective and user-friendly e-resources. This paper is one of two  
25  
26 98 results papers scoping consumer-facing electronic resources for people with a rare disease.  
27  
28

## 29 30 99 **Methods**

31  
32  
33 100 We systematically searched for peer-reviewed literature on consumer-facing electronic resources for  
34  
35 101 people with a rare disease, guided by the Preferred Reporting Items for Systematic Reviews and  
36  
37 102 Meta-Analyses extension for Scoping Reviews (17) (see supplementary file 1 for the completed  
38  
39 103 PRISMA-ScR checklist). The search was supplemented with a hand search of relevant peer-reviewed  
40  
41 104 journals. Patients and public were not directly involved in the design, reporting or dissemination  
42  
43 105 plan of this paper.  
44  
45  
46

47 106 Three databases, Medline, Embase and PsycInfo were searched in July 2021. No date limits were set  
48  
49 107 but we only included articles in the English language. We targeted empirical peer-reviewed full  
50  
51 108 articles but initial exploratory searches showed that a large proportion of the retrieved items were  
52  
53 109 conference presentations on resources not reported elsewhere. These were therefore also included  
54  
55 110 in the review. Search terms were developed through exploration of Medical Subject Heading terms,  
56  
57 111 and key words from equivalent papers from other fields. Search strings combined terms for rare  
58  
59  
60



1  
2  
3 112 disease, (including specific named rare disease conditions to maximise results), with patient and  
4  
5 113 carer facing resources (e.g., health resources, patient participation), and terms associated with  
6  
7 114 electronic resources (e.g., mobile applications, cell phone, e-health). In addition, a hand search was  
8  
9 115 performed in *Orphanet Journal of Rare Diseases* (searching for patient focused electronic resources)  
10  
11 116 and *Journal of Medical Internet Research* (searching for applications for rare diseases).  
12  
13  
14

15 117 The definition of a rare disease as having an incidence of less than 1:2,000 was used as a guide only  
16  
17 118 as the grouping together of related rare diseases muddied the waters on exact rates, as did the  
18  
19 119 range of definitions employed when reporting on rare diseases. The search therefore drew on  
20  
21 120 named rare conditions/groups of conditions listed in a 2017 report by the global investment  
22  
23 121 bank, Torrey that looked at the most common types of rare diseases that were a focus for  
24  
25 122 therapeutic companies around the world.[32] Imperfect as that list is, it retrieved many more useful  
26  
27 123 articles than the generic rare disease terms. "Mitochondrial respiratory chain disorders" was also  
28  
29 124 added as a large group of rare diseases that are not amenable to pharmaceutical treatment. The  
30  
31 125 condition groups searched for by name therefore were narcolepsy, primary biliary cholangitis, Fabry  
32  
33 126 disease, cystic fibrosis, haemophilia, spinal muscular atrophy, retinal dystrophy, X-linked  
34  
35 127 hypophosphatemia, urea cycle disorders, pulmonary arterial hypotension, cerebral  
36  
37 128 adrenoleukodystrophy, hereditary angioedema, AA amyloidosis, Cushing's syndrome, and  
38  
39 129 mitochondrial respiratory chain disorders.  
40  
41  
42  
43  
44

45 130 The following inclusion criteria needed to be met for a paper to be included: (a) the paper was  
46  
47 131 framed around the needs of people diagnosed with a rare disease or group of rare diseases (defined  
48  
49 132 as incidence <1:2,000 (1)); (b) the focus was on how an electronic resource could meet that need in  
50  
51 133 some way (c) either hypothesised and described a particular electronic resource, or reported on the  
52  
53 134 development, testing or evaluation of an actual electronic resource. Exclusion criteria were: (i) not  
54  
55 135 about a rare disease or group of rare diseases; (ii) electronic resources were not consumer-facing  
56  
57 136 (e.g., virtual monitoring where the consumer has a passive role and no access to the data,  
58  
59  
60

1  
2  
3 137 applications that consumers used altruistically to collect data for researchers; electronic tools for  
4  
5 138 health care professionals only).  
6  
7  
8 139 Search results were downloaded into reference management software EndNote X9 and two  
9  
10 140 researchers (JL and SB) independently screened 50% of titles and abstracts using the eligibility  
11  
12 141 criteria. Disagreements were discussed until consensus was met. Remaining articles were screened  
13  
14 142 by JL. Included articles were read in full and eligibility criteria again applied (by JL and validated by  
15  
16 143 SB). Data was extracted from the final set: rare disease/group of diseases, name of the e-resource,  
17  
18 144 need identified in the patient cohort, features of the e-resource, any other findings or observations  
19  
20  
21 145 of interest.

22  
23  
24 146 The final step was collating and synthesising the needs of people with a rare disease discussed in the  
25  
26 147 articles, looking for similarities and differences across different rare diseases, and the electronic  
27  
28 148 solutions proposed for each. From this, a framework was developed describing the synthesised  
29  
30 149 domains of needs and examples of electronic resources designed to meet the need.

## 31 32 33 34 150 Results

35  
36  
37  
38 151 The search resulted in 383 papers. Title and abstract screening removed 223 papers and full text  
39  
40 152 screening, another 33. This left 72 papers for data extraction and analysis. Figure 1 shows the  
41  
42 153 PRISMA flow chart for the search.

43  
44  
45 154 Studies were set in 16 different countries including seven papers that included all of Europe. United  
46  
47 155 States of America (n=14), the United Kingdom (n=11), and Canada (n=10) were the best represented  
48  
49 156 countries. Figure 2 shows frequencies of all countries. Twenty-one different rare diseases were  
50  
51 157 represented mostly in single papers, while 8 papers focused on rare diseases generally (n=8). The  
52  
53 158 most common rare disease reported was cystic fibrosis (n=28) followed by haemophilia (n=19). Table  
54  
55 159 1 gives details.

56  
57  
58  
59  
60 160

161 <<Figure 1: PRISMA flowchart for the search. (JMIR = *Journal of Medical Internet Research*; OJRD =  
 162 *Orphanet Journal of Rare Diseases*)>>

163 <<Figure 2: Countries in which included studies were undertaken (frequency of papers).>>

164 Table 1: Overview of included papers

| Rare disease / group of diseases                            | Number of papers |
|-------------------------------------------------------------|------------------|
| Acute Intermittent Porphyria (AIP)                          | 1                |
| Addison's disease                                           | 3                |
| Autoimmune liver diseases                                   | 1                |
| Bleeding disorders in women                                 | 1                |
| Complex regional pain syndrome                              | 1                |
| Congenital hypogonadotropic hypogonadism, Kallmann syndrome | 1                |
| Cystic fibrosis                                             | 28               |
| Genetic eye disorders                                       | 1                |
| Haemophilia                                                 | 19               |
| Hirschsprung's Disease                                      | 1                |
| Idiopathic subglottic stenosis                              | 1                |
| Inborn errors of metabolism                                 | 1                |
| Lymphangiomyomatosis                                        | 1                |
| Narcolepsy                                                  | 2                |
| Osteogenesis Imperfecta                                     | 1                |
| Phenylketonuria, maple syrup urine disease or tyrosinemia   | 1                |
| Rare and Congenital Anaemias                                | 1                |
| Rare diseases                                               | 6                |
| Rare Multisystemic Vascular Diseases                        | 1                |
| Thoracic Outlet Syndrome                                    | 1                |

165

166 Most papers reported on e-resources that were being trialled or were under development (n=56 e-  
 167 resources from 64 papers), while 12 were framed as scoping exercises or explored usability of  
 168 existing websites. For example, Nicholl and colleagues (18) explored the needs of people with rare  
 169 diseases that could be met by a consumer facing website, Ruther and colleagues (19) researched

1  
2  
3 170 what people with rare liver disorders need in an app, and Aizawa and colleagues (20) critiqued  
4  
5 171 information available on the internet for people with narcolepsy.  
6  
7  
8 172 E-resources fell into five broad categories: (i) mobile applications (apps) for cell phones or tablets  
9  
10 173 (n=22), (ii) social networking platforms (n=14), (iii) telehealth and virtual care platforms (n=13), (iv)  
11  
12 174 websites (interactive content e.g., education modules with quizzes) (n=15), and (v) websites (passive  
13  
14 175 content e.g., information) (n=7). Some e-resources fit into more than one category (e.g., WhatsApp  
15  
16 176 platform for parents of newly diagnosed infants with haemophilia provided social support from  
17  
18 177 other parents as well as virtual consults with specialists.(21) In these cases, the main function  
19  
20 178 decided the category.  
21  
22  
23  
24 179 Articles described four domains and 23 sub-domains of needs of people with a rare disease or  
25  
26 180 parents of children with a rare disease. A range of unique needs arising from features of individual  
27  
28 181 diseases were identified (e.g., risk of life-threatening acute episodes in Addison's Disease in a  
29  
30 182 context of few emergency health professionals being knowledgeable or confident to deal with  
31  
32 183 adrenal crisis (22)), as well as more global needs that were common across all presentations (e.g.,  
33  
34 184 the scarcity of high quality, relevant information about individual rare diseases). (18-49)  
35  
36  
37  
38 185 Needs are summarised in Table 2 giving examples of disease specific needs in each sub-domain, and  
39  
40 186 examples of the e-resources that had been developed or proposed to address those needs. Data  
41  
42 187 extracted from the final set of items is given in full in supplementary file 2.  
43  
44  
45  
46  
47  
48  
49  
50  
51  
52  
53  
54  
55  
56  
57  
58  
59  
60

| Domain                                               | Sub-domains with disease-specific examples                                                                                                                                                         | e-resource examples                                                                                                                                                                                                                        |
|------------------------------------------------------|----------------------------------------------------------------------------------------------------------------------------------------------------------------------------------------------------|--------------------------------------------------------------------------------------------------------------------------------------------------------------------------------------------------------------------------------------------|
| Chronic diseases requiring self-management           | Complicated self-management (e.g., monitoring for bleeds and factor usage for haemophilia (33, 50))                                                                                                | Online tool (Metabolic DietAppSuite) for smartphones/desktops for 15 different Inborn Errors of Metabolism. Creates a personalised dashboard including specific nutrient goals. Food diary, nutrient counts (51)                           |
|                                                      | Some treatment regimes require detailed record keeping to optimise outcomes (e.g., treatment of infections in CF (31, 49, 52, 53))                                                                 | MyCBDR (linked to Canadian Bleeding Disorder Registry (CBDR) is an app that allows people with a bleeding disorder to track infusions and add symptoms. Data can be share with all Haemophilia Treatment Centres in Canada (33)            |
|                                                      | Transition to self-care as adolescents become adults (e.g., teens with severe haemophilia (27, 54-56))                                                                                             | Smartphone app (Faccio Centro) aimed at adolescents with CF that lists daily therapy, with instructions on order, progress tracking, alerts for when to start and when checks are needed. Also can email questions to healthcare team (57) |
|                                                      | Exercise programs need to be tailored to the rare disease (e.g., reduced lung function and exercise tolerance in people with CF (58-60))                                                           | LAM App on smartphone with interfacing wearable devices for women with Lymphangiomyomatosis (LAM). Tailored exercise program physio check in (61)                                                                                          |
|                                                      | Monitoring changes in symptoms and treatments (e.g., recognising bleeds in mild haemophilia (62, 63))                                                                                              | MyCyFAPP calculates Pancreatic enzyme replacement therapy-doses for fat digestion, a symptoms diary, educational material, and linked to a web tool allowing health professionals to view data and give feedback (26, 28, 64)              |
|                                                      | Burden of hospital attendance (e.g., living far away from only specialist centre for narcolepsy (65); rare diseases with high disease burden (e.g., CF (66))                                       | An ultrasound diagnostic solution for children with haemophilia, the EMO.TI.ON. System used at home by parents or caregivers to diagnose suspected bleeds. System can transfer live images to specialist physician (67)                    |
|                                                      | Depression, anxiety, distress affect adherence to treatment regimes, which in turn affect health and quality of life (e.g., distress of parents of newly diagnosed children with haemophilia (21)) | Internet delivered cognitive behavioural therapy sessions, eHealth CF-CBT guided by a qualified therapist for people with cystic fibrosis experiencing depression or anxiety (68)                                                          |
| Lack of high-quality information on the rare disease | Information that is readable, accessible and from a credible source (e.g., lack of specific information on rare and congenital anaemias (39))                                                      | Newborn Screening Connect (NBS Connect) provides high quality information for parents of children diagnosed with a disorder included in the newborn screening panel performed routinely in USA (41)                                        |
|                                                      | Information available in your language, appropriate for your culture (e.g., Canadian haemophilia resources in English and French (54, 62))                                                         | Online education package for congenital hypogonadotropic hypogonadism and the olfacto-genital syndrome is available in 20 European languages. Readability score meets recommended level (25)                                               |
|                                                      | Appropriate to age group, or special needs (e.g., information for teens with CF (69))                                                                                                              | Gene.vision website on genetic eye disorders optimised for people with impaired vision (38)                                                                                                                                                |
|                                                      | Access to relevant clinical trials, or new research findings may be difficult to find (43)                                                                                                         | NIH Rare Diseases Clinical Research Network (RDCRN) notifies registrants with a range of rare disorders of relevant studies (43)                                                                                                           |
|                                                      | Disease specific information on niche topics like family planning (e.g., for genetic disorders such as CF (30))                                                                                    | Facebook group (MyGirlsBlood) for women with bleeding disorders where women can ask questions or share experiences especially around menstruation (32)                                                                                     |

|                                                                     |                                                                                                                                                                                                       |                                                                                                                                                                                                                                       |
|---------------------------------------------------------------------|-------------------------------------------------------------------------------------------------------------------------------------------------------------------------------------------------------|---------------------------------------------------------------------------------------------------------------------------------------------------------------------------------------------------------------------------------------|
|                                                                     | Urgent need for disease specific information during COVID-19 pandemic (44)                                                                                                                            | Weekly webcasts on COVID for people with CF with questions through Google forms. Email notifications of webcasts sent to known patients in USA (44)                                                                                   |
| Specialist centres may be geographically dispersed and hard to find | Identifying appropriate care for rare disease (e.g., nearest specialist; appropriately trained allied health professionals (e.g., physios who know risks of exercise with haemophilia (70))           | Mobile app developed by VASCERN (European Reference Network on Rare Multisystemic Vascular diseases) contains an easily searchable Directory to find closest expert and to find appropriate patient advocacy group within Europe (42) |
|                                                                     | Burden of hospital attendance (e.g., living far away from only specialist centre; rare diseases with high disease burden (e.g., severe haemophilia (71))                                              | Virtual Reality Visual Feedback Module for people with complex regional pain syndrome (who have few treatment options and for whom travel is onerous). After initial in-person training and assessment, can be continued at home (72) |
|                                                                     | Knowledgeable emergency care for acute events may be hard to find (e.g., for infants with newly diagnosed haemophilia (21))                                                                           | Quick response (QR coded) bracelet has a scannable QR code that links to emergency management information for people in adrenal crisis (22)                                                                                           |
|                                                                     | Information on daily management may be lacking for both the person with the rare disease and the health professionals supporting them (e.g., for parents of infants with Hirschsprung's Disease (48)) | Thoracic Outlet Syndrome (TOS) Awareness Facebook group for both people with TOS and health professionals. Most posts encouraging and giving sound advice (47)                                                                        |
| Social isolation                                                    | Unable to connect with people with the same disorder (e.g., being the only parent you know with a child with a rare disorder (24))                                                                    | Online forum for people with Addison's Disease or Cushing's syndrome, moderated by the Dutch Adrenal Society (35)                                                                                                                     |
|                                                                     | Disorders that require isolation for infection control, or safety are isolated from unaffected peers as well (e.g., fracture risk for children with OI in new surroundings (29))                      | Online conferences (BreatheCon) for people with cystic fibrosis who must isolate for infection control (30)                                                                                                                           |
|                                                                     | Emotional support needed for distressed parents (e.g., for parents of children with OI (29))                                                                                                          | Skype support groups for women with acute intermittent porphyria mediated by a porphyria experts (73)                                                                                                                                 |
|                                                                     | Support for daily management issues (e.g., online for people with idiopathic subglottic stenosis (34))                                                                                                | Social media campaign around living with Hirschsprung's Disease: Shit happens on Facebook, Twitter, Blog posts (48)                                                                                                                   |
|                                                                     | Information and peer knowledge sharing for adolescents transitioning to full self-management (e.g., for teens with CF (69))                                                                           | hiFive - small online group for 11-19 year-olds living with severe haemophilia. Closed to parents. Trying to harness peer to peer transmission of self-management skills (55)                                                         |
|                                                                     | Social support associated with better mental health / health outcomes (e.g., parents of newly diagnosed infants with Phenylketonuria (41))                                                            | Online peer support program (CFOne) for adolescents and young adults with CF (74)                                                                                                                                                     |

188 **Table 2:** Domains and sub-domains of needs of people with a rare disease that can be solved or supported by a consumer-facing electronic resource. (CF =  
 189 cystic fibrosis, OI = osteogenesis imperfecta)

## 190 Chronic diseases requiring complicated self-management

191 Many rare diseases were described as having a high disease burden relying on complicated self-  
192 management regimes. The association of adherence to specific treatments with better health  
193 outcomes is strongly supported by evidence for cystic fibrosis (75), metabolic diseases requiring  
194 medical diets (76), and haemophilia (77), providing a clear rationale for supporting self-  
195 management. Optimal self-management in many cases required careful record-keeping of  
196 symptoms and tracking of treatments. Mobile apps were often designed to assist with this need.  
197 Symptom trackers were a common feature with or without medication alerts or treatment  
198 information (pancreatic enzyme replacement therapy for people with cystic fibrosis (26, 64)). Some  
199 had a function that allowed sharing of patient entered data with their health care team (e.g., 52, 60).  
200 Others tracked dietary intake for those on a medical diet (e.g., 51).

## 201 Lack of high-quality information

202 A common problem across all the rare diseases represented in this review was access to high-  
203 quality, culturally and demographically appropriate information from a credible source that was easy  
204 to find and understand. Information sought could be around the nature of the disease, medical  
205 treatments, prognoses, etc for the person with the disease and sometimes also for the health  
206 professionals supporting them (e.g., 22, 25, 47). Links to registries and research consortiums helped  
207 people stay up to date with treatment options (e.g., 43). Information about day-to-day management  
208 issues was often sought from social networks of people with experience of the same disease rather  
209 than specialist health professionals (e.g., 32, 35, 36). One paper critiqued existing online information  
210 on the rare disorder narcolepsy, following a study that showed access to high quality web-based  
211 information could reduce time to diagnosis through better understanding of signs and symptoms  
212 (20). Some informational needs related to “niche” topics, e.g., an app for the subset of people with  
213 mild haemophilia to help them assess for cryptic bleeds after injury (62).

## 214 Specialist centres for rare diseases may be geographically dispersed

215 Another common problem was the small number of rare disease specialist centres that could be  
216 widely dispersed geographically. Some e-resources provided directories for the nearest specialist  
217 centre (38, 46), or nearest, appropriately skilled allied health provider or patient advocacy agency  
218 (39). Others provided virtual consultations (e.g., 71) or tailored exercise (e.g., 58) or mental health  
219 services (68) via telehealth.

## 220 Social isolation

221 The social isolation that comes from having a rare disease is often discussed as a need unique to  
222 people with a rare disease. Khair and colleagues (78) note that for many adolescent boys with  
223 haemophilia, the only person other than their doctor who knows about their disease is their parent.  
224 Limited access to specialist services means people or parents of a child with a rare condition have to  
225 face non-urgent day-to-day issues themselves unless they find appropriate social support. Social  
226 support could be with people with the same disease (e.g., Facebook / Twitter group for  
227 Hirschsprung's disease (48)) or include health professionals (e.g., online support group for thoracic  
228 outlet syndrome (47)).

## 229 Discussion

230 This review found 72 papers outlining the needs of people with a rare disease, or their carers that  
231 could be addressed by an e-resource. Four domains and 23 subdomains of needs were identified and  
232 e-resources to address or support those needs were broadly categorised into five groups: mobile  
233 apps, social support platforms, telehealth and virtual health tools, and active and passive websites.  
234 A range of unique needs arising from features of individual diseases were identified. Examples  
235 included the burden of physical isolation to prevent infection for people with cystic fibrosis (30), the  
236 acute distress of parents of infants with osteogenesis imperfecta at suspicions of child abuse that



1  
2  
3 237 often preceded diagnosis (29), and the difficulty of recognising signs of an impending adrenal crisis  
4  
5 238 for people with Addison's Disease that can be life threatening.(22, 35) While the burden of disease  
6  
7 239 for rare disorders may be similar to higher incidence conditions such as stroke or breast cancer, the  
8  
9  
10 240 added burden of the lack of a solid evidence base of effective treatments, best practice guidelines  
11  
12 241 and competent and knowledgeable health service providers is not. The well documented diagnostic  
13  
14 242 odyssey for people with rare diseases (3) and laments that health professionals had never heard of  
15  
16 243 their disease (4) is a burden unique to this group.  
17  
18  
19 244 This burden of uniqueness spills over to other needs. Exercise is crucial for physical and mental  
20  
21 245 wellbeing but for many people with a rare disease, any exercise program must be tailored and  
22  
23 246 supervised by a suitably knowledgeable health professional. Reduced exercise tolerance for people  
24  
25 247 with cystic fibrosis and LAM, and risk of bleeds into their joints for people with haemophilia were  
26  
27 248 addressed by telehealth or online modules.(58, 60, 61, 79-81) Social support of group exercise  
28  
29 249 classes is known to be motivating but is not possible for people with cystic fibrosis who are at risk of  
30  
31 250 cross infection. Online solutions went some way to solving this need (e.g., 80).  
32  
33  
34  
35  
36 251 Four studies critiqued the content of posts on social support platforms for people with different rare  
37  
38 252 diseases and found them to be overwhelmingly positive and supportive.(34, 35, 47, 48) Real-time,  
39  
40 253 knowledgeable solutions to problems, plus emotional support were demonstrated as highly valuable  
41  
42 254 to members and these benefits were noted as important goals for any hypothesised new e-  
43  
44 255 resources.(19, 29)  
45  
46  
47  
48 256 It has been argued that an often overlooked need for people with a rare disease is support for their  
49  
50 257 parents or carers, on whom the burden of management often falls.(82) This review identified 15 e-  
51  
52 258 resources that supported carers (mostly parents). The distress that parents feel on diagnosis of a  
53  
54 259 child with a rare disease was frequently discussed and provided the rationale for social support  
55  
56 260 platforms and messaging apps, management support apps, and telehealth tools. One German study  
57  
58  
59  
60

1  
2  
3 261 provided parents of children with cystic fibrosis online writing-based therapy to alleviate  
4  
5 262 psychological distress and anxiety.(83)  
6  
7  
8 263 Readability of information found on the internet has been widely critiqued and criticised. A typical  
9  
10 264 example is a review of online education resources from government and health care organisations  
11  
12 265 on multiple sclerosis and rheumatoid arthritis (neither considered rare diseases) were found to be  
13  
14 266 written at 11<sup>th</sup> or 12<sup>th</sup> grade standard, whereas the average American reads at a 5<sup>th</sup> grade  
15  
16 267 standard.(84) The authors state material that is too complex limits its usefulness and increases  
17  
18 268 inequities. E-resources in this review were often noted to be co-designed by health professionals,  
19  
20 269 patient advocacy agencies, parents, and people with a rare disease as well as education experts to  
21  
22 270 mitigate this risk. (e.g., 25, 51) Usability and acceptability studies were reported for some but not all  
23  
24 271 the resources found in this review. Ensuring resources are easy to understand, appeal to the target  
25  
26 272 group's demographics (e.g., adolescents versus older adults), and suited to the skills of the users is  
27  
28 273 an obvious goal but one that this scoping review did not always find was done well. Patient advocacy  
29  
30 274 agencies are noted in the broader literature to be particularly proactive in ensuring acceptable and  
31  
32 275 easy to understand resources. A survey of patient advocacy groups for people with rare diseases,  
33  
34 276 found 100% of respondents would be interested in collaborating with relevant healthcare or  
35  
36 277 research groups to develop complementary resources suited to their members, and avoid wasted  
37  
38 278 effort involved in duplication.(82)  
39  
40  
41  
42  
43  
44

#### 45 279 Strengths and limitations

46  
47 280 The nature of the topic (e-resources) lent itself more to conference presentations rather than full  
48  
49 281 peer-reviewed articles. A strength of our search was that we included these items although a  
50  
51 282 weakness is that limited information was able to be extracted from some abstracts. As with all  
52  
53 283 searches that aim to be systematic and exhaustive, our search terms could have missed some  
54  
55 284 papers. In particular, the search terms to capture rare diseases was problematic. Since there are  
56  
57 285 over 7,000 rare diseases, it was not feasible to search for each by name. Our strategy was therefore  
58  
59  
60

1  
2  
3 286 to search for a limited number of named rare disease groups. The list of needs identified are  
4  
5 287 characteristic of any rare disease, and while some needs are unique to some specific disease  
6  
7 288 manifestation, the majority were applicable to all. This generalisability will be useful for anyone  
8  
9 289 designing e-resources to support people with a rare disease.  
10  
11  
12

## 13 290 Conclusion

14  
15  
16 291 This review scoped the peer-reviewed literature to identify needs unique to people, or carers of  
17  
18 292 people with a rare disease. It identified four broad domains of need: (i) support for complicated self-  
19  
20 293 management regimes, (ii) access to high-quality, easy to understand information, (iii) access to  
21  
22 294 appropriate specialist services, and (iv) social support. Most studies involved needs of people or  
23  
24 295 carers of children with haemophilia or cystic fibrosis but also addressed another 20 named rare  
25  
26 296 diseases or rare disease groups (e.g., inborn errors of metabolism). While the physical burden of a  
27  
28 297 rare disease may be comparable to higher prevalence conditions such as stroke or cancer, rare  
29  
30 298 diseases have unique overlying issues: the lengthy odyssey to find a diagnosis, the quest to find  
31  
32 299 appropriate specialists to manage your care, the lack of a solid evidence base of effective treatments  
33  
34 300 or best practice guidelines, or access to competent and knowledgeable general health service  
35  
36 301 providers are unique to those with a rare disease. E-resources are well placed to address many of  
37  
38 302 these problems but must be carefully co-designed with key stakeholders lest their complexity,  
39  
40 303 narrow scope or cultural inappropriateness further disempower this already marginalised group.  
41  
42  
43  
44  
45  
46  
47  
48  
49

## 50 305 Abbreviations

51  
52  
53 306 AIP Acute intermittent porphyria  
54  
55  
56 307 CF cystic fibrosis  
57  
58  
59 308 e-resource electronic resource  
60

1  
2  
3 309 *JMIR* *Journal of Medical Internet Research*  
4  
5

6 310 LAM Lymphangioleiomyomatosis  
7  
8

9 311 OI osteogenesis imperfecta  
10  
11

12 312 *OJRD* *Orphanet Journal of Rare Diseases*  
13  
14

15 313  
16  
17

18 314 **Declarations**

19  
20  
21  
22 315 **Conflict of interest**

23  
24  
25 316 The authors have no conflicts of interest to declare.  
26  
27

28 317 **Ethics**

29  
30  
31 318 No ethical approval was required as all data was publicly available.  
32  
33

34 319 **Patient consent for publication**

35  
36  
37 320 Not applicable  
38  
39

40  
41 321 **Data availability statement**  
42  
43

44 322 All data is provided in the paper, supplementary files or in the public domain.  
45  
46

47 323 **Funding**

48  
49  
50 324 This project was funded by a Mito Foundation Project Grant 2019-21.  
51  
52  
53  
54  
55  
56  
57  
58  
59  
60

## 325 Acknowledgements

326 The research conducted at the Murdoch Children's Research Institute was supported by the  
327 Victorian Government's Operational Infrastructure Support Program. The Chair in Genomic Medicine  
328 awarded to JC is generously supported by The Royal Children's Hospital Foundation.

## 329 Author contributions

330 JL, SB, SH and BNGE designed the study. JL and SB collected data and undertook the analysis. SH, ZF,  
331 BNGE, JC and JB critically reviewed and commented on the results. JL wrote the first draft of the  
332 paper which was reviewed by SB, SH, ZF, BNGE, JC and JB. All authors approved the final version.

## 333 Supplementary file 1: PRISMA-ScR Checklist

## 334 Supplementary file 2: Full data extraction sheet for included papers

335

## 336 References

- 337 1. Boycott KM, Vanstone MR, Bulman DE, MacKenzie AE. Rare-disease genetics in the era of  
338 next-generation sequencing: discovery to translation. *Nature Reviews Genetics*. 2013;14(10):681-91.
- 339 2. Ramalle-Gómara E, Domínguez-Garrido E, Gómez-Eguílaz M, Marzo-Sola ME, Ramón-  
340 Trapero JL, Gil-de-Gómez J. Education and information needs for physicians about rare diseases in  
341 Spain. *Orphanet J Rare Dis*. 2020;15(1):18.
- 342 3. Thevenon J, Duffourd Y, Masurel-Paulet A, Lefebvre M, Feillet F, El Chehadeh-Djebbar S, et  
343 al. Diagnostic odyssey in severe neurodevelopmental disorders: toward clinical whole-exome  
344 sequencing as a first-line diagnostic test. *Clin Genet*. 2016;89(6):700-7.
- 345 4. Long JC, Best S, Hatem S, Theodorou T, Catton T, Murray S, et al. The long and winding road:  
346 perspectives of people and parents of children with mitochondrial conditions negotiating  
347 management after diagnosis. *Orphanet J Rare Dis*. 2021;16(1):310.
- 348 5. Augustine EF, Adams HR, Mink JW. *Clinical Trials in Rare Disease: Challenges and*  
349 *Opportunities*. *J Child Neurol*. 2013;28(9):1142-50.
- 350 6. Parikh S, Goldstein A, Koenig MK, Scaglia F, Enns GM, Saneto R, et al. Diagnosis and  
351 management of mitochondrial disease: a consensus statement from the Mitochondrial Medicine  
352 Society. *Genet Med*. 2015;17(9):689-701.
- 353 7. Geberhiwot T, Moro A, Dardis A, Ramaswami U, Sirrs S, Marfa MP, et al. Consensus clinical  
354 management guidelines for Niemann-Pick disease type C. *Orphanet J Rare Dis*. 2018;13(1):50.

- 1  
2  
3 355 8. Kaufmann P, Pariser AR, Austin C. From scientific discovery to treatments for rare diseases –  
4 356 the view from the National Center for Advancing Translational Sciences – Office of Rare Diseases  
5 357 Research. *Orphanet J Rare Dis.* 2018;13(1):196.  
6 358 9. Depping MK, Uhlenbusch N, von Kodolitsch Y, Klose HFE, Mautner VF, Löwe B. Supportive  
7 359 care needs of patients with rare chronic diseases: multi-method, cross-sectional study. *Orphanet J*  
8 360 *Rare Dis.* 2021;16(1):44.  
9 361 10. Kreuter M, Bendstrup E, Russell AM, Bajwah S, Lindell K, Adir Y, et al. Palliative care in  
10 362 interstitial lung disease: living well. *Lancet Respir Med.* 2017;5(12):968-80.  
11 363 11. Quinn L, Davis K, Yee A, Snyder H. Understanding genetic learning needs of people affected  
12 364 by rare disease. *J Genet Couns.* 2020;29(6):1050-8.  
13 365 12. Rubio-Gozalbo ME, Haskovic M, Bosch AM, Burnyte B, Coelho AI, Cassiman D, et al. The  
14 366 natural history of classic galactosemia: lessons from the GalNet registry. *Orphanet J Rare Dis.*  
15 367 2019;14(1):86.  
16 368 13. Scalco RS, Lucia A, Santalla A, Martinuzzi A, Vavla M, Reni G, et al. Data from the European  
17 369 registry for patients with McArdle disease and other muscle glycogenoses (EUROMAC). *Orphanet J*  
18 370 *Rare Dis.* 2020;15(1):330.  
19 371 14. Woodward L, Johnson S, Walle JV, Beck J, Gasteyger C, Licht C, et al. An innovative and  
20 372 collaborative partnership between patients with rare disease and industry-supported registries: the  
21 373 Global aHUS Registry. *Orphanet J Rare Dis.* 2016;11(1):154.  
22 374 15. Pavan S, Rommel K, Mateo Marquina ME, Höhn S, Lanneau V, Rath A. Clinical Practice  
23 375 Guidelines for Rare Diseases: The Orphanet Database. *PLoS One.* 2017;12(1):e0170365.  
24 376 16. Le Cam Y, Bolz-Johnson M. Expert by experience: Valuing patient engagement in healthcare.  
25 377 In: Pomey M-P, Denis J-L, Dumez V, editors. *Patient Engagement: How patient-provider partnerships*  
26 378 *transform healthcare organisations.* Cham, Switzerland: Palgrave Macmillan; 2019. p. p. 233-67.  
27 379 17. Tricco AC, Lillie E, Zarin W, O'Brien KK, Colquhoun H, Levac D, et al. PRISMA Extension for  
28 380 Scoping Reviews (PRISMA-ScR): Checklist and Explanation. *Ann Intern Med.* 2018;169(7):467-73.  
29 381 18. Nicholl H, Tracey C, Begley T, King C, Lynch MA. Internet Use by Parents of Children With  
30 382 Rare Conditions: Findings From a Study on Parents? Web Information Needs. *J Med Internet Res.*  
31 383 2017;19(2):e51.  
32 384 19. Ruther DF, Sebode M, Lohse AW, Wernicke S, Bottinger E, Casar C, et al. Mobile app  
33 385 requirements for patients with rare liver diseases: A single center survey for the ERN RARE-LIVER.  
34 386 *Clinics and Research in Hepatology and Gastroenterology.* 2021;45(6).  
35 387 20. Aizawa R, Sunahara H, Kume K, Tsuchiya S, Adachi H, Kanbayashi T, et al. Status of  
36 388 narcolepsy-related information available on the Internet in Japan and its effective use. *Sleep and*  
37 389 *Biolog Rhythms.* 2008;6(4):201-7.  
38 390 21. Barazani Brutman T, Bashari D, Lenda H, Leiba Fisher R, Azar Avivi S, Kenet G. New  
39 391 communication technologies improve hemophilia care. *Haemophilia;* February2017. p. 134-5.  
40 392 22. Colman AW, Sellick JFK, Weaver JU. Use of Quick Response (QR) coded bracelets and cards  
41 393 for the improvement of cortisol deficiency/Addison's disease management: An audit of quality of  
42 394 care of the management of steroid deficiency in acute illness. *BMJ Innovations.* 2018;4(3):115-22.  
43 395 23. Ackbarali TA, Croteau SE, Pipe SW, Tickle K, Long L, Wilkes S, et al. Assessing Patient and  
44 396 Provider Perspectives, Clinical Practice, Behaviors, and Knowledge on Hemophilia A Care. *Blood;* 05  
45 397 Nov2020. p. 24-5.  
46 398 24. Armayones M, Hernandez-Encuentra E, Gomez-Zuniga B, Guillamon N, Ontiveros G, Bosque  
47 399 A, et al. APTIC: A social network to improve the quality of life of members of patients' associations.  
48 400 *Orphanet Journal of Rare Diseases Conference: 5th European Conference on Rare Diseases,*  
49 401 *ECRD2010.*  
50 402 25. Badiu C, Bonomi M, Borshchevsky I, Cools M, Craen M, Ghervan C, et al. Developing and  
51 403 evaluating rare disease educational materials co-created by expert clinicians and patients: the  
52 404 paradigm of congenital hypogonadotropic hypogonadism. *Orphanet J Rare Dis.* 2017;12(1).

- 1  
2  
3 405 26. Boon M, Calvo-Lerma J, Claes I, Havermans T, Asseiceira I, Bulfamante A, et al. Use of a  
4 406 mobile application for self-management of pancreatic enzyme replacement therapy is associated  
5 407 with improved gastro-intestinal related quality of life in children with Cystic Fibrosis. *J Cystic Fibrosis*.  
6 408 2020;19(4):562-8.
- 7  
8 409 27. Breakey VR, Ignas DM, Warias AV, White M, Blanchette VS, Stinson JN. A pilot randomized  
9 410 control trial to evaluate the feasibility of an Internet-based self-management and transitional care  
10 411 program for youth with haemophilia. *Haemophilia*. 2014;20(6):784-93.
- 11 412 28. Calvo-Lerma J, Boon M, Hulst J, Colombo C, Asseiceira I, Garriga M, et al. Change in nutrient  
12 413 and dietary intake in european children with cystic fibrosis after a 6-month intervention with a self-  
13 414 management mhealth tool. *Nutrients*. 2021;13(6) (no pagination).
- 14 415 29. Castro RA, Chougui K, Bilodeau C, Tsimicalis A. Exploring the Views of Osteogenesis  
15 416 Imperfecta Caregivers on Internet-Based Technologies: Qualitative Descriptive Study. *J Med Internet*  
16 417 *Res*. 2019;21(12):e15924.
- 17  
18 418 30. Cipriani D, Dulcan E. See and be seen: The CF community. *Pediatric Pulmonology*;  
19 419 September2017. p. 147-8.
- 20 420 31. Cummings E, Hauser J, Cameron-Tucker H, Fitzpatrick P, Jessup M, Walters EH, et al.  
21 421 Enhancing self-efficacy for self-management in people with cystic fibrosis. *Studies in Health*  
22 422 *Technology and Informatics*. 2011;169:33-7.
- 23 423 32. D'Ambrosio C. Open versus closed social networking groups. *Haemophilia*; May2014. p. 183.
- 24 424 33. Decker K, Meilleur C. CBDR and MyCBDR advancing hemophilia nursing practice in Canada.  
25 425 *Haemophilia*; May2018. p. 37.
- 26 426 34. Haik D, Kashanchi K, Tajran S, Heilbronn C, Anderson C, Francis DO, et al. The Online Support  
27 427 Group as a Community: A Thematic Content Analysis of an Online Support Group for Idiopathic  
28 428 Subglottic Stenosis. *Annals of Otology, Rhinology and Laryngology*. 2019;128(4):293-9.
- 29 429 35. Kauw D, Repping-Wuts H, Noordzij A, Stikkelbroeck N, Hermus A, Faber M. The Contribution  
30 430 of Online Peer-to-Peer Communication Among Patients With Adrenal Disease to Patient-Centered  
31 431 Care. *J Med Internet Res*. 2015;17(3):e54.
- 32 432 36. Kirk S, Milnes L. An exploration of how young people and parents use online support in the  
33 433 context of living with cystic fibrosis. *Health expectations*. 2016;19(2):309-21.
- 34 434 37. Kühnle L, Mücke U, Lechner MW, Klawonn F, Grigull L. Development of a Social Network for  
35 435 People Without a Diagnosis (RarePairs): Evaluation Study. *J Med Internet Res*. 2020;22(9):e21849.
- 36 436 38. Lee Yeong J, Thomas P, Buller J, Moosajee M. A Newly Developed Web-Based Resource on  
37 437 Genetic Eye Disorders for Users With Visual Impairment (Gene.Vision): Usability Study. *J Med*  
38 438 *Internet Res*. 2021;23(1):e19151.
- 39 439 39. Manu-Pereira MM, Gutierrez-Valle V, Vives-Corrans JL, Laudet IPE. ENERCA: Towards a  
40 440 European Reference Network (ERN) in rare haematological diseases. *British Journal of Haematology*;  
41 441 April2016. p. 39-40.
- 42 442 40. Moon H, Moon J. Comparative readability analysis of information on exercise for hemophilia  
43 443 patients. *Haemophilia*. 2021;27(SUPPL 2):57.
- 44 444 41. Osara Y, Coakley K, Devarajan A, Singh RH. Development of newborn screening connect (NBS  
45 445 connect): a self-reported patient registry and its role in improvement of care for patients with  
46 446 inherited metabolic disorders. *Orphanet J Rare Dis*. 2017;12(1):132.
- 47 447 42. Paglialonga A, Gaetano R, Robert L, Hurard M, Botella LM, Barr N, et al. eHealth for patients  
48 448 with rare diseases: the eHealth Working Group of the European Reference Network on Rare  
49 449 Multisystemic Vascular Diseases (VASCERN). *Orphanet J Rare Dis*. 2021;16(1):164.
- 50 450 43. Richesson RL, Lee HS, Cuthbertson D, Lloyd J, Young K, Krischer JP. An automated  
51 451 communication system in a contact registry for persons with rare diseases: Scalable tools for  
52 452 identifying and recruiting clinical research participants. *Contemp Clin Trials*. 2009;30(1):55-62.
- 53 453 44. Rits S, Snell C, Uluer AZ. Weekly patient webcasts: An adult CF center's response to the  
54 454 COVID-19 pandemic. *Pediatric Pulmonology*; October2020. p. 78.
- 55  
56  
57  
58  
59  
60



- 1  
2  
3 455 45. Rodman J, Krivec U, Jackson A. Patient perspectives on electronic access to registry health  
4 456 records: An Irish-Slovene online survey. *J Cystic Fibrosis*. 2016;15(Supplement 1):S36.
- 5 457 46. Storf H, Hartz T, Tegtbauer N, Pfeiffer W, Schmidtke J, Graessner H, et al. Vision and  
6 458 challenges of a cartographic representation of expert medical centres for rare diseases. *Studies in*  
7 459 *health technology and informatics*. 2014;205:677-81.
- 8 460 47. Walker KK. Cognitive and affective uses of a Thoracic Outlet Syndrome Facebook support  
9 461 group. *Health Comm*. 2014;29(8):773-81.
- 10 462 48. Wittmeier K, Holland C, Hobbs-Murison K, Crawford E, Beauchamp C, Milne B, et al. Analysis  
11 463 of a Parent-Initiated Social Media Campaign for Hirschsprung's Disease. *J Med Internet Res*.  
12 464 2014;16(12):e288.
- 13 465 49. Wood J, Jenkins S, Putrino D, Mulrennan S, Morey S, Cecins N, et al. A smartphone  
14 466 application for reporting symptoms in adults with cystic fibrosis improves the detection of  
15 467 exacerbations: Results of a randomised controlled trial. *J Cystic Fibrosis*. 2020;19(2):271-6.
- 16 468 50. Huang X, Chen L, Shao S, Yang R, Ma X, Xue F. Developing and evaluating HE-APP:  
17 469 Acceptability and usability of a smartphone APP system to improve self-management in Chinese  
18 470 patients with hemophilia. *Haemophilia*; June2020. p. 99.
- 19 471 51. Ho G, Ueda K, Houben RFA, Joa J, Giezen A, Cheng B, et al. Metabolic Diet App Suite for  
20 472 inborn errors of amino acid metabolism. *Mol Gen Metabol*. 2016;117(3):322-7.
- 21 473 52. Floch J, Vilarinho T, Zettl A, Ibanez-Sanchez G, Calvo-Lerma J, Stav E, et al. Users' Experiences  
22 474 of a Mobile Health Self-Management Approach for the Treatment of Cystic Fibrosis: Mixed Methods  
23 475 Study. *JMIR mHealth and uHealth*. 2020;8(7):e15896.
- 24 476 53. Grande SW, Kotzbauer G, Hager A, Martensson M, Longacre M. Improving care for pediatric  
25 477 cystic fibrosis in Sweden using a successful mHealth patient support system. *Pediatric Pulmonology*;  
26 478 September2017. p. 435.
- 27 479 54. Breakey VR, Warias A, Ignas DM, Blanchette VS, Stinson J. Usability testing of an online  
28 480 transition program for adolescents with hemophilia. *Haemophilia*; March2012. p. 31.
- 29 481 55. Khair K, Collier C, Holland M, Smith S. The role of social networking in haemophilia  
30 482 management. *Haemophilia*; July2010. p. 129-30.
- 31 483 56. Khair K, Holland M, Carrington S. Social networking for adolescents with severe haemophilia.  
32 484 *Haemophilia*. 2012;18(3):e290-e6.
- 33 485 57. Balestri E, Vergnani S, Dall'Ara S, Grazioli C, Mannozi B, Ambroni M, et al. 'F (accio) C  
34 486 (entro)': Project for a smartphone application to increase adherence to aerosol treatment in  
35 487 adolescents with cystic fibrosis. *Italian Journal of Pediatrics Conference: 25th Italian Congress of*  
36 488 *Cystic Fibrosis and the 15th National Congress of Cystic Fibrosis Italian Society Milan Italy2020*.
- 37 489 58. Carr SB, Ronan P, Lorenc A, Mian A, Madge SL, Robinson N. Children and adults Tai Chi study  
38 490 (CF-CATS2): A randomised controlled feasibility study comparing internet-delivered with face-to-face  
39 491 Tai Chi lessons in cystic fibrosis. *ERJ Open Research*. 2018;4(4).
- 40 492 59. Cox NS, Alison JA, Button BM, Wilson JW, Holland AE. Feasibility and acceptability of an  
41 493 Internet-Based program to promote physical activity in adults with cystic fibrosis. *Resp Care*.  
42 494 2015;60(3):422-9.
- 43 495 60. Howard S, Speight L, Mills-Bennett R, Lau D, Ketchell RI, Duckers J. The All Wales Adult Cystic  
44 496 Fibrosis Centre (AWACFC) Virtual Instruction of Exercise with Technology to Enhance Care-VIEWTEC  
45 497 Programme. *J Cystic Fibrosis*; June2014. p. S20.
- 46 498 61. Guilliams JM, Garvin M, Sizelove H, Lea Kelly M, Lynch Y, Luo SW, et al. Feasibility and  
47 499 usefulness of a mobile health exercise intervention in women with lymphangioleiomyomatosis.  
50 500 *Cardiopul Phys Therapy J*; July2021. p. e7.
- 51 501 62. Lomotey RK, Mulder K, Nilson J, Schachter C, Wittmeier K, Deters R. Mobile self-  
52 502 management guide for young men with mild hemophilia in cases of minor injuries. *Network*  
53 503 *Modeling Analysis in Health Informatics and Bioinformatics*. 2014;3(1).
- 54  
55  
56  
57  
58  
59  
60



- 1  
2  
3 504 63. Nilson J, Mulder K, Schachter C, Wittmeier K, Lomotey R, Arnold C, et al. Development,  
4 505 evaluation and updates of HIRT? (Hemophilia injury recognition tool). *Haemophilia*; May2018. p.  
5 506 136.
- 6 507 64. Calvo-Lerma J, Boon M, Colombo C, de Koning B, Asseiceira I, Garriga M, et al. Clinical  
7 508 evaluation of an evidence-based method based on food characteristics to adjust pancreatic enzyme  
8 509 supplements dose in cystic fibrosis. *J Cystic Fibrosis*. 2020.
- 10 510 65. Ingravallo F, Vignatelli L, Pagotto U, Vandi S, Mangiaruga A, Moresco M, et al. Telemedicine  
11 511 with mobile internet devices for innovative multidisciplinary patientcentred care of patients with  
12 512 narcolepsy. Protocol of the randomized controlled trial TENAR (TElemedicine for NARcolepsy). *Euro*  
13 513 *J Neurol*; May2020. p. 516.
- 14 514 66. Parrott H, Elborn S, Madge S. A digital solution for virtual consultation and sharing health  
15 515 data in adults with cystic fibrosis. *J Cystic Fibrosis*; June2019. p. S51.
- 16 516 67. Lassandro G, Annichiarico G, Scherillo MR, Cassone C, Giordano P. EMO.TI.ON.: Technologies  
17 517 for the safety of children with hemophilia. *Blood Transfusion*; November2017. p. s539.
- 18 518 68. Verkleij M, Georgiopoulou AM, Friedman D. Development and evaluation of an internet-  
19 519 based cognitive behavioral therapy intervention for anxiety and depression in adults with cystic  
20 520 fibrosis (eHealth CF-CBT): An international collaboration. *Internet Interv*. 2021;24.
- 21 521 69. Rudolf I, Pieper K, Nolte H, Junge S, Dopfer C, Sauer-Heilborn A, et al. Assessment of a  
22 522 Mobile App by Adolescents and Young Adults With Cystic Fibrosis: Pilot Evaluation. *JMIR mHealth*  
23 523 *and uHealth*. 2019;7(11):e12442.
- 24 524 70. Timmer AM, Kloek JCJ, de Kleijn P, Kuijlaars RIA, Schutgens GRE, Veenhof C, et al. A Blended  
25 525 Physiotherapy Intervention for Persons With Hemophilic Arthropathy: Development Study. *J Med*  
26 526 *Internet Res*. 2020;22(6):e16631.
- 27 527 71. Sottilotta G, Arrigo P, Drago L, Mallamace E, Martorano S, Romeo E, et al. The HEMONLINE  
28 528 project: Preliminary results. *Haemophilia*; July2012. p. 77.
- 29 529 72. Stevenson Won A, Barreau CA, Gaertner M, Stone T, Zhu J, Wang YC, et al. Assessing the  
30 530 Feasibility of an Open-Source Virtual Reality Mirror Visual Feedback Module for Complex Regional  
31 531 Pain Syndrome: Pilot Usability Study. *J Med Internet Res*. 2021;23(5):e16536.
- 32 532 73. Naik H, Balwani M, Doheny D, Liu L, Desnick R. Experience with a pilot skype internet  
33 533 support group for symptomatic patients with acute intermittent porphyria. *Clinical Chemistry and*  
34 534 *Laboratory Medicine*; May2013. p. eA10.
- 35 535 74. Blackwell LS, Romero SL, Romero CV, McLean KA, Dawkins K, Hoag J, et al. CFfone: A social  
36 536 networking site for adolescents and young adults with cf. *Pediatric Pulmonology*; September2012.  
37 537 p. 430.
- 38 538 75. Sanders DB, Bittner RCL, Rosenfeld M, Hoffman LR, Redding GJ, Goss CH. Failure to Recover  
39 539 to Baseline Pulmonary Function after Cystic Fibrosis Pulmonary Exacerbation. *Am J Resp Critical Care*  
40 540 *Med*. 2010;182(5):627-32.
- 41 541 76. Cipriano LE, Rupar CA, Zaric GS. The Cost-Effectiveness of Expanding Newborn Screening for  
42 542 up to 21 Inherited Metabolic Disorders Using Tandem Mass Spectrometry: Results from a Decision-  
43 543 Analytic Model. *Value in Health*. 2007;10(2):83-97.
- 44 544 77. Nilsson IM, Berntorp E, Löfqvist T, Pettersson H. Twenty-five years' experience of  
45 545 prophylactic treatment in severe haemophilia A and B. *J Intern Med*. 1992;232(1):25-32.
- 46 546 78. Khair K, Holland M, Carrington S. Social networking for adolescents with haemophilia.  
47 547 *Haemophilia*; March2011. p. 369.
- 48 548 79. Cox NS, Eldridge B, Rawlings S, Dreger J, Corda J, Hauser J, et al. A web-based intervention to  
49 549 promote physical activity in adolescents and young adults with cystic fibrosis: protocol for a  
50 550 randomized controlled trial. *BMC Pulm Med*. 2019;19(1):253.
- 51 551 80. Lewis T. Improving quality of life in patients with cystic fibrosis with exercise: CF foundation  
52 552 impact grant update. *Pediatric Pulmonology*; October2019. p. 385-6.

- 1  
2  
3 553 81. Wagner B, Seuser A, Kruger S, Herzig ML, Hilberg T, Ay C, et al. Establishing an online  
4 554 physical exercise program for people with hemophilia. *Wiener Klinische Wochenschrift*.  
5 555 2019;131(21-22):558-66.  
6 556 82. McMullan J, Crowe AL, Bailie C, Moore K, McMullan LS, Shamandi N, et al. Improvements  
7 557 needed to support people living and working with a rare disease in Northern Ireland: current rare  
8 558 disease support perceived as inadequate. *Orphanet Journal of Rare Diseases*. 2020;15(1):315.  
9 559 83. Fidika A, Herle M, Lehmann C, Weiss C, Knaevelsrud C, Goldbeck L. A web-based  
10 560 psychological support program for caregivers of children with cystic fibrosis: A pilot study. *Health  
11 561 and Quality of Life Outcomes*. 2015;13(1).  
12 562 84. Linton L, Aruru M. Evaluating the readability of patient education materials across multiple  
13 563 sclerosis and rheumatoid arthritis disease states. *J Am Pharm Assoc*. 2013;53 (2):e28.  
14  
15  
16 564  
17  
18  
19

## 20 565 Figure legends

- 21 566 Figure 1: PRISMA flowchart for the search. (*JMIR* = *Journal of Medical Internet Research*; *OJRD* =  
22  
23 567 *Orphanet Journal of Rare Diseases*)  
24  
25  
26 568 Figure 2: Countries in which included studies were undertaken (frequency of papers).  
27  
28  
29  
30  
31  
32  
33  
34  
35  
36  
37  
38  
39  
40  
41  
42  
43  
44  
45  
46  
47  
48  
49  
50  
51  
52  
53  
54  
55  
56  
57  
58  
59  
60

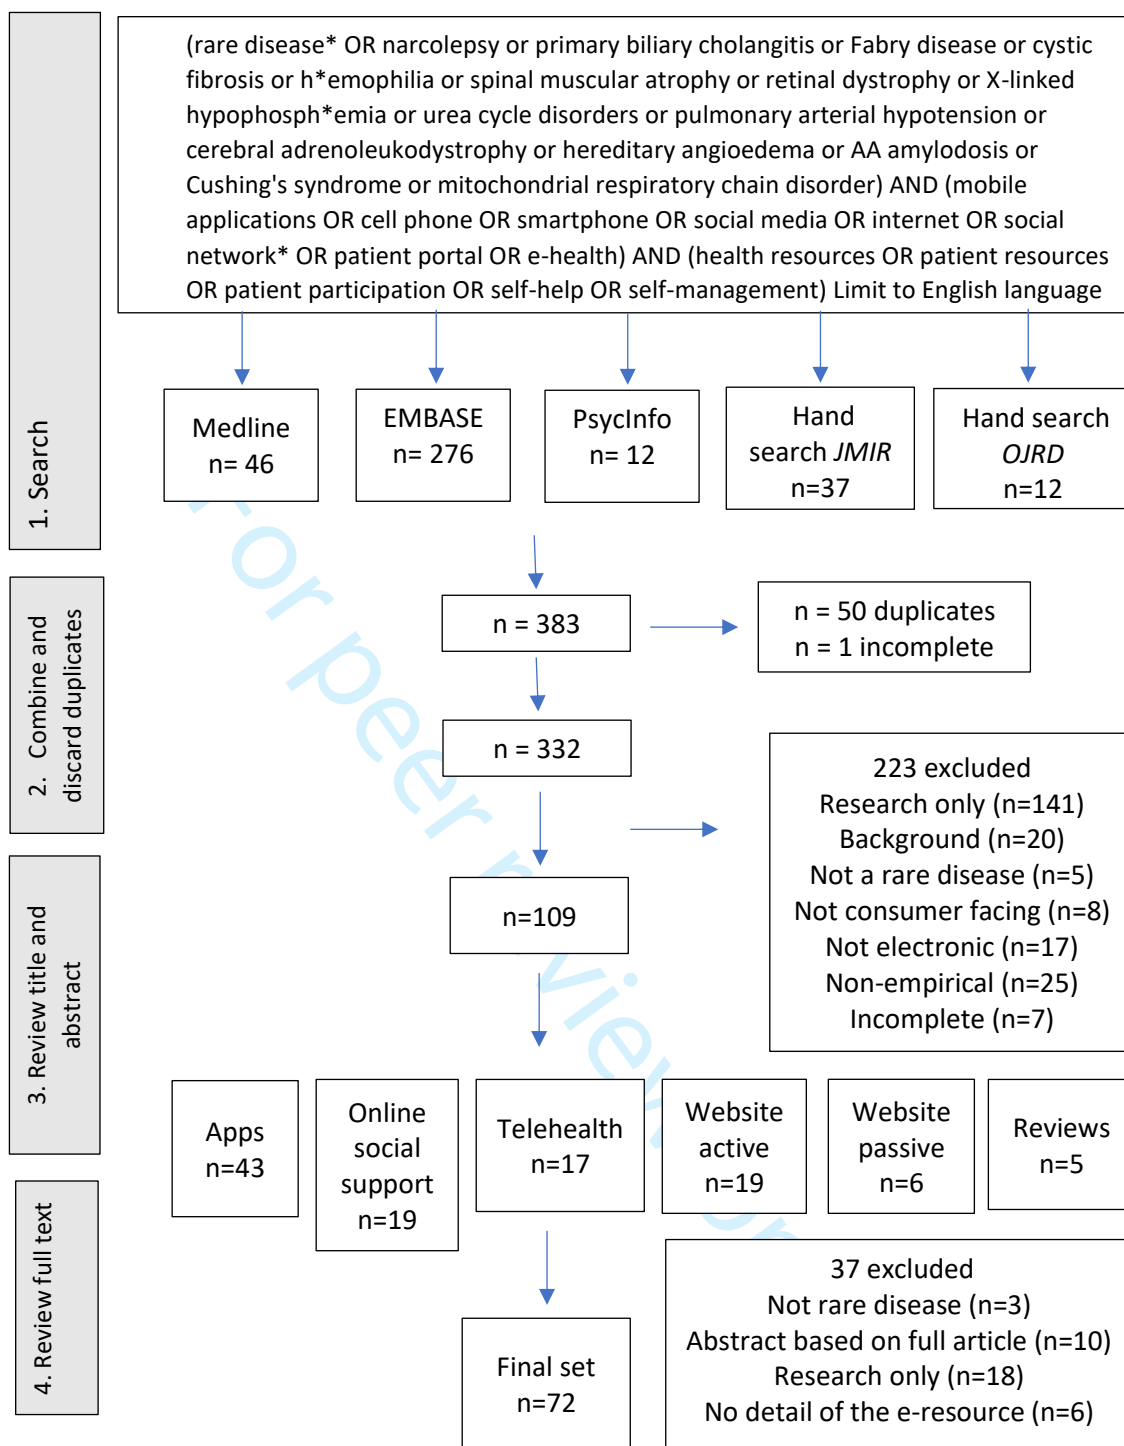

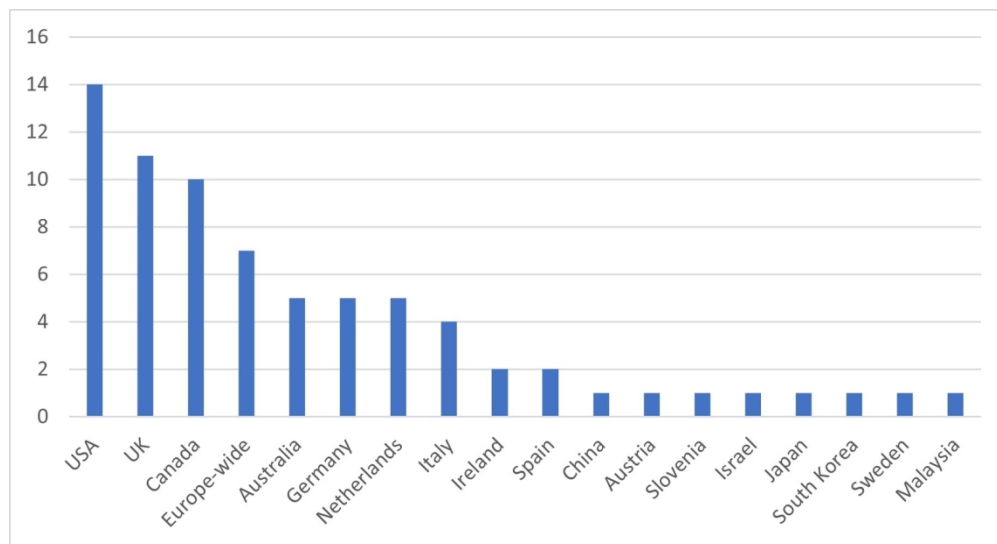

Figure 2: Countries in which included studies were undertaken (frequency of papers).

141x76mm (300 x 300 DPI)

## PRISMA-ScR Checklist

| Section             | Subsection                                           | Item | Page of Mss                |
|---------------------|------------------------------------------------------|------|----------------------------|
| <b>Title</b>        |                                                      | 1    | 1                          |
| <b>Abstract</b>     | Structured summary                                   | 2    | 1                          |
| <b>Introduction</b> | Rationale                                            | 3    | 3                          |
|                     | Objectives                                           | 4    | 4                          |
| <b>Methods</b>      | Protocol and registration                            | 5    | 4                          |
|                     | Eligibility criteria                                 | 6    | 4                          |
|                     | Information sources                                  | 7    | 4                          |
|                     | Search                                               | 8    | 4                          |
|                     | Selection of sources of evidence                     | 9    | 4                          |
|                     | Data charting process                                | 10   | 5                          |
|                     | Data items                                           | 11   | 5                          |
|                     | Critical appraisal of individual sources of evidence | 12   | NA for this scoping review |
|                     | Summary measures                                     | 13   | NA for scoping reviews     |
|                     | Synthesis of results                                 |      | 5                          |
|                     | Risk of bias across studies                          | 15   | NA for scoping reviews     |
|                     | Additional analysis                                  | 16   | NA for scoping reviews     |
| <b>Results</b>      | Selection of sources of evidence                     | 17   | 5 ff                       |
|                     | Characteristics of sources of evidence               | 18   | 7 ff                       |
|                     | Critical appraisal within sources of evidence        | 19   | NA for this scoping review |
|                     | Synthesis of results                                 | 20   | 8, 12                      |
|                     | Risk of bias across studies                          | 22   | NA for scoping reviews     |
|                     | Additional analysis                                  | 23   | NA for scoping reviews     |
| <b>Discussion</b>   | Summary of evidence                                  | 24   | 13                         |
|                     | Limitations                                          | 25   | 14                         |
|                     | Conclusions                                          | 26   | 14                         |
| <b>Funding</b>      |                                                      | 27   | 15                         |

From: Tricco AC, Lillie E, Zarin W, O'Brien KK, Colquhoun H, Levac D, et al. PRISMA Extension for Scoping Reviews (PRISMA-ScR): Checklist and Explanation. Ann Intern Med. 2018;169(7):467-73.

1  
2  
3  
4  
5  
6  
7  
8  
9  
10  
11  
12  
13  
14  
15  
16  
17  
18  
19  
20  
21  
22  
23  
24  
25  
26  
27  
28  
29  
30  
31  
32  
33  
34  
35  
36  
37  
38  
39  
40  
41  
42  
43  
44  
45  
46  
47  
48  
49  
50  
51  
52  
53  
54  
55  
56  
57  
58  
59  
60

For peer review only

|   | A                                                                                                                                                                                                                                                                               | B    | C       | D               | E                                                                         | F                     | G                   | H                                                                                                                                 | I                                                                                                                                                                                                                                                                                                                                                                                        | J               | K            | L                                                                                                                                                                                                                                                                                                                                                             | M                                                                                                          |
|---|---------------------------------------------------------------------------------------------------------------------------------------------------------------------------------------------------------------------------------------------------------------------------------|------|---------|-----------------|---------------------------------------------------------------------------|-----------------------|---------------------|-----------------------------------------------------------------------------------------------------------------------------------|------------------------------------------------------------------------------------------------------------------------------------------------------------------------------------------------------------------------------------------------------------------------------------------------------------------------------------------------------------------------------------------|-----------------|--------------|---------------------------------------------------------------------------------------------------------------------------------------------------------------------------------------------------------------------------------------------------------------------------------------------------------------------------------------------------------------|------------------------------------------------------------------------------------------------------------|
|   | Reference                                                                                                                                                                                                                                                                       | Year | Country | Rare disease    | Name of intervention/resource if applicable                               | Research or available |                     | Needs/barriers to care                                                                                                            | Details                                                                                                                                                                                                                                                                                                                                                                                  | e-resource      | Language/s   | e-resource details                                                                                                                                                                                                                                                                                                                                            | Findings (If research only)                                                                                |
| 1 | Ackbarali TA, et al. Assessing Patient and Provider Perspectives, Clinical Practice, Behaviors, and Knowledge on Hemophilia A Care. <i>Blood</i> ; 05 Nov2020. p. 24-5.                                                                                                         | 2020 | USA     | Haemophilia     | a web-based joint educational initiative for patients/caregivers and HCPs | Research              | Conference abstract | Management of severe haemophilia is rapidly evolving - patients, carers and HCPs alike unsure of new treatments but keen to learn |                                                                                                                                                                                                                                                                                                                                                                                          | website active  | Not given    | 1-hour online video-based CME activity for HCPs and 1-hour healthcare education activity for patients were created in June, 2020 to address identified practice and knowledge needs among HCPs, and knowledge, communication and self-efficacy behaviors among patients. Each activity consisted of slides, polling and live questions, and remains on-demand |                                                                                                            |
| 2 | Aizawa R, et al. Status of narcolepsy-related information available on the Internet in Japan and its effective use. <i>Sleep and Biological Rhythms</i> . 2008;6(4):201-7.                                                                                                      | 2008 | Japan   | Narcolepsy      | Existing internet resources                                               | publicly available    | Journal article     | High quality web-based information can reduce time to diagnosis for people with narcolepsy                                        | Useful, harmful information is low on search engine rankings.                                                                                                                                                                                                                                                                                                                            | website passive | Not given    | Existing web-based resources                                                                                                                                                                                                                                                                                                                                  | Patients were asking for info on the hereditary nature of the disease and ways to deal with their disease. |
| 3 | Al-Saleh H, et al. Beta testing of the "MY CF" smartphone/tablet app: In patients with cystic fibrosis. Conference Abstract presented at American Journal of Respiratory and Critical Care Medicine. Conference: American Thoracic Society International Conference, ATS; 2014. | 2014 | USA     | Cystic fibrosis | MY CF                                                                     | Research              | Conference abstract | Complicated self-management                                                                                                       | Difficulties keeping track of medications, test results and symptoms for adolescents or parents of younger children with CF.                                                                                                                                                                                                                                                             | App             |              | Android OS for phone or tablet. The three most favored functionalities of the app were: Medication list, Symptom Diary, and Weight/Height/Body Mass Index monitoring. 32 invited to participate; of 23 who did, majority wanted to continue using it and would recommend it                                                                                   |                                                                                                            |
| 4 | Armayones M, et al. APTIC: A social network to improve the quality of life of members of patients' associations. Conference Abstract presented at Orphanet Journal of Rare Diseases. Conference: 5th European Conference on Rare Diseases, ECRD; 2010.                          | 2010 | Spain   | Rare diseases   | APTIC                                                                     | publicly available    | Conference abstract | Fragmentation of information regarding rare diseases                                                                              | Need for people to learn from one another, share experiences                                                                                                                                                                                                                                                                                                                             | social platform | Not given    | Social networking platform that aims at enabling the individual members of patients' associations (mostly parents of children with chronic and rare diseases) to share experiences, information, advice                                                                                                                                                       |                                                                                                            |
| 5 | Aznar J, et al. Telemedicine in Hemophilia: Virtual consultation for the hematologist at patient's home. <i>Haemophilia</i> ; July2012. p. 72.                                                                                                                                  | 2012 | Spain   | Haemophilia     | domiciliary virtual consultation and virtual monitoring tools             | Research              | Conference abstract | Frequent hospital visits impact QoL                                                                                               | Domiciliary replacement therapy (DRT) ensures rapid infusion of lacking factors when any bleeding episode occurs and reduces hospital dependency of patients with hemophilia. However, these patients still have to visit the hospital frequently because the hematologist can prescribe general guidelines for home-replacement therapy but cannot adapt them to the bleeding evolution | telehealth      | Not reported | Three interventions: (1) patient entered bleeding episode and self managed treatment; (2) virtual monitoring by ultrasound of haemarthroses, (3) Virtual consult                                                                                                                                                                                              | Successful in 45 patients which in turn may decrease dependency on hospital visits and by association QoL  |
| 6 |                                                                                                                                                                                                                                                                                 |      |         |                 |                                                                           |                       |                     |                                                                                                                                   |                                                                                                                                                                                                                                                                                                                                                                                          |                 |              |                                                                                                                                                                                                                                                                                                                                                               |                                                                                                            |

|    | A                                                                                                                                                                                                                                                                                                                                                                      | B    | C      | D                                                                                          | E                                       | F        | G                   | H                                                                                                                                                                  | I                                                                                                                                                                                                                                                                                                                                                                                                      | J               | K                                                    | L                                                                                                                                                                                                                                                                                                                                                                                                                                                                     | M                                                                                                                                                                                                                        |
|----|------------------------------------------------------------------------------------------------------------------------------------------------------------------------------------------------------------------------------------------------------------------------------------------------------------------------------------------------------------------------|------|--------|--------------------------------------------------------------------------------------------|-----------------------------------------|----------|---------------------|--------------------------------------------------------------------------------------------------------------------------------------------------------------------|--------------------------------------------------------------------------------------------------------------------------------------------------------------------------------------------------------------------------------------------------------------------------------------------------------------------------------------------------------------------------------------------------------|-----------------|------------------------------------------------------|-----------------------------------------------------------------------------------------------------------------------------------------------------------------------------------------------------------------------------------------------------------------------------------------------------------------------------------------------------------------------------------------------------------------------------------------------------------------------|--------------------------------------------------------------------------------------------------------------------------------------------------------------------------------------------------------------------------|
| 7  | Badiu C, et al. Developing and evaluating rare disease educational materials co-created by expert clinicians and patients: the paradigm of congenital hypogonadotropic hypogonadism. Orphanet Journal of Rare Diseases. 2017;12(1)                                                                                                                                     | 2017 | Europe | congenital hypogonadotropic hypogonadism (CHH) and the olfacto-genital (Kallmann) syndrome | Educational package                     | Research | Journal article     | Need for high quality information/education on rare diseases                                                                                                       | Important it is easy to read and engaging                                                                                                                                                                                                                                                                                                                                                              | website passive | 20 languages                                         | patient education materials                                                                                                                                                                                                                                                                                                                                                                                                                                           | Appropriate reading level and accessibility                                                                                                                                                                              |
| 8  | Balestri E, et al. 'Faccio C (entro)': Project for a smartphone application to increase adherence to aerosol treatment in adolescents with cystic fibrosis. Conference Abstract presented at Italian Journal of Pediatrics. Conference: 25th Italian Congress of Cystic Fibrosis and the 15th National Congress of Cystic Fibrosis Italian Society. Milan Italy; 2020. | 2020 | Italy  | Cystic fibrosis                                                                            | Faccio Centro                           | Research | Conference abstract | Complicated self-management with decreasing adherence from adolescents                                                                                             | Patients with Cystic fibrosis have onerous therapy - respiratory physiotherapy, therapy by aerosol, oral, intravenous and physical activity. During adolescence the therapy adherence, that is undergoing treatments at the right time of the day, in the right sequence and dosage, considerably decreases with negative consequences in terms of: health status, quality of life and hospitalization | App             |                                                      | Mobile phone app - lists daily therapy, with instructions on order, progress tracking, alerts for when to start and when checks are needed. Also can email questions to HCP team.                                                                                                                                                                                                                                                                                     |                                                                                                                                                                                                                          |
| 9  | Barazani Brutman T, et al. New communication technologies improve hemophilia care. Haemophilia. 2017;23(Supplement 2):134-5.                                                                                                                                                                                                                                           | 2017 | Israel | Haemophilia                                                                                | WhatsApp social support group messaging | Research | Conference abstract | Parents with newly diagnosed children require immediate response when things happen                                                                                |                                                                                                                                                                                                                                                                                                                                                                                                        | social platform | Not given                                            | Social support groups of parents, patients and medical staff WhatsApp. Parents, patients and medical staff used the WhatsApp application installed on smartphone to provide immediate response to various issues: queries regarding bleeds (with relevant photos), queries regarding dosage/ frequency of therapy, queries about quality of life (QoL) and specific situations noted at school/ kindergarden, personal communication and general consult and support. | Extension of physical groups at the treatment centre.                                                                                                                                                                    |
| 10 | Blackwell LS, et al. CFone: A social networking site for adolescents and young adults with cf. Pediatric Pulmonology. 2012;35):430.                                                                                                                                                                                                                                    | 2012 | USA    | Cystic fibrosis                                                                            | CFOne                                   | Research | Conference abstract | Transition from child to adult requires increased independence and self efficacy                                                                                   | Social support associated with better psychological wellbeing and better outcomes.                                                                                                                                                                                                                                                                                                                     | social platform | Not given                                            | online peer support program for adolescents and young adults with CF                                                                                                                                                                                                                                                                                                                                                                                                  | Social networking sites for adolescents and young adults with CF may be useful for increasing knowledge of disease management, increasing perceptions of social support and improving mental health and quality of life. |
| 11 | Boon M, et al. Use of a mobile application for self-management of pancreatic enzyme replacement therapy is associated with improved gastro-intestinal related quality of life in children with Cystic Fibrosis. Journal of Cystic Fibrosis. 2020;19(4):562-568                                                                                                         | 2020 | Europe | Cystic fibrosis                                                                            | MyCyFAPP                                | Research | Journal article     | Complicated self (parental)-management for gastrointestinal distress in children                                                                                   | Most patients with cystic fibrosis (CF) suffer from pancreatic insufficiency, leading to fat malabsorption, malnutrition, abdominal discomfort and impaired growth. Pancreatic enzyme replacement therapy (PERT) effective but evidence-base on dosing still being built. This uses a new algorithm.                                                                                                   | App             | Dutch, English, Flemish, Italian, Portugese, Spanish | App calculates individual PERT-doses for optimal fat digestion and includes a symptoms diary, educational material, and it is linked to a web tool allowing HCPs to view data and give feedback.                                                                                                                                                                                                                                                                      | Increased GI QoL measures.                                                                                                                                                                                               |
| 12 | Breakey VR, et al. A feasibility study of "managing hemophilia online": An Internet-based self-management and transitional care program for teens. Haemophilia. 2012;3):207-8.                                                                                                                                                                                         | 2012 | Canada | Haemophilia                                                                                | online self-management intervention     | Research | Conference abstract | Adolescents have heightened educational needs as they learn to manage their disease and become self-sufficient in preparation for transition to adult health care. |                                                                                                                                                                                                                                                                                                                                                                                                        | website passive | English and French                                   | Online course - not clear if it is interactive. Pilot - still working it out                                                                                                                                                                                                                                                                                                                                                                                          |                                                                                                                                                                                                                          |



|    | A                                                                                                                                                                                                                                                         | B    | C      | D               | E                                                | F        | G                   | H                                                                                                                                                                                                           | I                                                                                                                                                                                                                                                                                                    | J              | K                                                    | L                                                                                                                                                                                                | M                                                                                                                                                                                                                                                                                                                                                                                                                                             |
|----|-----------------------------------------------------------------------------------------------------------------------------------------------------------------------------------------------------------------------------------------------------------|------|--------|-----------------|--------------------------------------------------|----------|---------------------|-------------------------------------------------------------------------------------------------------------------------------------------------------------------------------------------------------------|------------------------------------------------------------------------------------------------------------------------------------------------------------------------------------------------------------------------------------------------------------------------------------------------------|----------------|------------------------------------------------------|--------------------------------------------------------------------------------------------------------------------------------------------------------------------------------------------------|-----------------------------------------------------------------------------------------------------------------------------------------------------------------------------------------------------------------------------------------------------------------------------------------------------------------------------------------------------------------------------------------------------------------------------------------------|
| 13 | Breakey VR, et al. A pilot randomized control trial to evaluate the feasibility of an internet-based self-management and transitional care program for youth with haemophilia. Haemophilia. 2014;20(6):784-93.                                            | 2014 | Canada | Haemophilia     | Teens Taking Charge: Managing Hemophilia Online' | Research | Journal article     | Adolescents have heightened educational needs as they learn to manage their disease and become self-sufficient in preparation for transition to adult health care.                                          |                                                                                                                                                                                                                                                                                                      | website active | English and French                                   | 8 week educational program on line with weekly telephone support from a trained Research Assistant.                                                                                              | Teens on the intervention arm showed significant improvement in disease-specific knowledge (P = 0.004), self-efficacy (P = 0.007) and transition preparedness (P = 0.046). There was a statistically significant improvement in knowledge in the intervention group when compared to the control group (P = 0.01). Overall, the teens found the website to be informative, comprehensive and easy to use and were satisfied with the program. |
| 14 | Breakey VR, et al. Feasibility study of a randomized control trial to evaluate an internet-based self-management program for adolescents with hemophilia: Preliminary results and observations. Journal of Thrombosis and Haemostasis; July2013. p. 1058. | 2013 | Canada | Haemophilia     | Teens Taking Charge: Managing Hemophilia Online' | Research | Conference abstract | Adolescents have heightened educational needs as they learn to manage their disease and become self-sufficient in preparation for transition to adult health care.                                          |                                                                                                                                                                                                                                                                                                      | website active | English and French                                   | 8 week educational program on line with weekly telephone support from a trained Research Assistant.                                                                                              | Overall, these teens found the website to be informative, comprehensive and easy to use and were satisfied with the program.                                                                                                                                                                                                                                                                                                                  |
| 15 | Breakey VR, et al. The value of usability testing for Internet-based adolescent self-management interventions: "Managing Hemophilia Online". BMC medical informatics and decision making. 2013;13:113.                                                    | 2013 | Canada | Haemophilia     | Teens Taking Charge: Managing Hemophilia Online' | Research | Conference abstract | Adolescents have heightened educational needs as they learn to manage their disease and become self-sufficient in preparation for transition to adult health care.                                          |                                                                                                                                                                                                                                                                                                      | website active | English and French                                   | 8 week educational program on line. Course contained multimedia components (videos, animations, quizzes)                                                                                         |                                                                                                                                                                                                                                                                                                                                                                                                                                               |
| 16 | Calvo-Lerma J, et al. Clinical evaluation of an evidence-based method based on food characteristics to adjust pancreatic enzyme supplements dose in cystic fibrosis. Journal of Cystic Fibrosis. 2020.                                                    | 2020 | Europe | Cystic fibrosis | MyCyFAPP                                         | Research | Journal article     | Complicated self (parental)-management for gastrointestinal distress in children                                                                                                                            | Most patients with cystic fibrosis (CF) suffer from pancreatic insufficiency, leading to fat malabsorption, malnutrition, abdominal discomfort and impaired growth. Pancreatic enzyme replacement therapy (PERT) effective but evidence-base on dosing still being built. This uses a new algorithm. | App            | Dutch, English, Flemish, Italian, Portugese, Spanish | App calculates individual PERT-doses for optimal fat digestion and includes a symptoms diary, educational material, and it is linked to a web tool allowing HCPs to view data and give feedback. | Improved fat absorption for those with poor baseline measures.                                                                                                                                                                                                                                                                                                                                                                                |
| 17 | Calvo-Lerma J,et al. Change in nutrient and dietary intake in european children with cystic fibrosis after a 6-month intervention with a self-management mhealth tool. Nutrients. 2021;13(6)                                                              | 2021 | Europe | Cystic fibrosis | MyCyFAPP                                         | Research | Journal article     | People with CF have increased energy needs and a diet with a specific nutrient distribution. Nutritional status is an indicator of disease prognosis and survival. Self(parental)-management is complicated | App provided educational resources about nutrition and dietary advice for parents                                                                                                                                                                                                                    | App            | Dutch, English, Flemish, Italian, Portugese, Spanish | Food diary, nutrition follow-up (goals), symptoms diary (health diary), nutrition educational material (living with CF) and messages among other functions                                       | Users had modest improvements towards the nutritional guidelines                                                                                                                                                                                                                                                                                                                                                                              |
| 18 | Carr SB, et al. Children and adults Tai Chi study (CF-CATS2): A randomised controlled feasibility study comparing internet-delivered with face-to-face Tai Chi lessons in cystic fibrosis. ERI Open Research. 2018;4(4)                                   | 2018 | UK     | Cystic fibrosis | NA                                               | Research | Journal article     | Maintaining exercise difficult for people with CF due to isolation.                                                                                                                                         | 8 lessons over 3 months, delivered face to face (n=22) or via internet (n=18) for 40 adults and children with CF.                                                                                                                                                                                    | telehealth     | English                                              | Lessons delivered over Skype; also had a DVD, booklet, stickers and tshirts aimed at different ages to increase adherence.                                                                       | Feasibility and safety were demonstrated. All participants showed significant improvements in self-reported sleep, cough (both daytime and night-time), stomach ache and breathing. No differences in lung function, health status, quality of life, sleep or mindfulness was shown before or after completing the lessons.                                                                                                                   |
| 19 | Carr SB,et al. Children and adults Tai Chi study (CF-CATS2): A randomised controlled feasibility study comparing internet-delivered with face-to-face Tai Chi lessons in cystic fibrosis. ERI Open Research. 2018;4(4).                                   | 2018 | UK     | Cystic fibrosis | Internet delivered Tai-Chi class                 | Research | Journal article     | Isolation yet needing tailored exercise                                                                                                                                                                     | Maintaining an exercise regime can be difficult in cystic fibrosis: group classes risk potential infection, yet motivation is hard to maintain when alone.                                                                                                                                           | telehealth     | English                                              | Comparison of F2F and internet classes                                                                                                                                                           | Improvements in sleep, cough, GI symptoms and breathing but no diff in lung function, ealth status and QoL. Findings same in both groups.                                                                                                                                                                                                                                                                                                     |

|    | A                                                                                                                                                                                                                                                                        | B    | C            | D                            | E                                                           | F                    | G                   | H                                                                                                                                           | I                                                                                                                                                                                                                                                                                                                                                                                                                                                                                                                                                                                                                                                                                | J               | K         | L                                                                                                | M                                                                                                                                                                                                                                                                                                                                                                                                                                                                                                                                                                                                                                                                                                                                                                                                                                                                                                                                                                                                                                                                                                                                                                                                                                                                                                                                                                                                                                                                                                                                                                                                                                                                                 |
|----|--------------------------------------------------------------------------------------------------------------------------------------------------------------------------------------------------------------------------------------------------------------------------|------|--------------|------------------------------|-------------------------------------------------------------|----------------------|---------------------|---------------------------------------------------------------------------------------------------------------------------------------------|----------------------------------------------------------------------------------------------------------------------------------------------------------------------------------------------------------------------------------------------------------------------------------------------------------------------------------------------------------------------------------------------------------------------------------------------------------------------------------------------------------------------------------------------------------------------------------------------------------------------------------------------------------------------------------|-----------------|-----------|--------------------------------------------------------------------------------------------------|-----------------------------------------------------------------------------------------------------------------------------------------------------------------------------------------------------------------------------------------------------------------------------------------------------------------------------------------------------------------------------------------------------------------------------------------------------------------------------------------------------------------------------------------------------------------------------------------------------------------------------------------------------------------------------------------------------------------------------------------------------------------------------------------------------------------------------------------------------------------------------------------------------------------------------------------------------------------------------------------------------------------------------------------------------------------------------------------------------------------------------------------------------------------------------------------------------------------------------------------------------------------------------------------------------------------------------------------------------------------------------------------------------------------------------------------------------------------------------------------------------------------------------------------------------------------------------------------------------------------------------------------------------------------------------------|
| 20 | Castro RA, et al. Exploring the Views of Osteogenesis Imperfecta Caregivers on Internet-Based Technologies: Qualitative Descriptive Study. J Med Internet Res. 2019;21(12):e15924.                                                                                       | 2019 | Canada       | Osteogenesis Imperfecta (OI) | Exploring use of what's available online and what is needed | publicly available   | Journal article     | Multiple needs                                                                                                                              | (1) Distraction for children after surgery to promote rest and immobilization, or to distract from painful or frightening procedures etc; (2) Isolation from family or friends at a distance or in unsafe places for the child to visit; (3) Carers' self care; (4) Parents and carers feeling distressed by the disease and child's suffering; (5) Managing logistics of caregiving/ HCPs (6) Communication with HCP; (7) Facilitating care; (8) Information seeking; (9) social isolation (10) Updates on research and new treatments (11) Concern about quality, security (12) wishlist (13) caregivers desired child-friendly and age-appropriate (14) In their own language | other           |           |                                                                                                  | (1) Games, videos, audio books have a calming affect to distract from broedom, pain or fear; (2) Social media platforms like FaceTime useful for staying in touch; (3) Can be a lot of waiting for appointments and then keeping the child quiet at home after surgeries etc. Yoga apps, games and ; (4) Watching inspirational videos of other children with OI doing well gave hope; (5) Booking online much easier and e-calendars useful to store all appointments; (6) Some allowed email or messaging (e.g., to SW or PT); (7) Some tools allowed carers to find local community and care resources - e.g., wheelchair accessibility of local shopping centre etc. Appropriately adapted sports programs; (8) Found via Google so not optimal (9) Social media specifically for OI - share day-to-day care information rather than using it for specific information on prognoses or treatments. Some caregivers were more interested in answering others' questions than in having their own questions answered. OI parents were the ones who know practical day-to-day care strategies, such as where to find adaptive clothing and winter boots that would fit her child's physique. Claimed to get faster information from a social media platform group rather than an HCP. (10) Access to information; (11) Concerned about web-based predators or cyberbullies or judgement from other parents. Often were confronted with worst-case scenarios that were not applicable to their own children. (12) Web-based home fracture-splinting videos with diverse techniques for every fracture possible • Web-based videos nortravine OI patients before and after various |
| 21 | Cipriani D, Dulcan E. See and be seen: The CF community. Pediatric Pulmonology. 2017;52(Supplement 47):147-148.                                                                                                                                                          | 2017 | USA          | Cystic fibrosis              | BreatheCon                                                  | limited availability | Conference abstract | CF considered an invisible disease; social support limited by infection risk; niche information hard to find; mental health often impacted. | Lack of understanding or peers and family when the disease is "invisible." Desire to connect with people with the same disease (who "get it") but face-to-face not possible. telling your boss about CF as well as colleagues, classmates, friends, in-laws and other new family. The alienation of invisibility is compounded by uncomfortable, lonely, boring treatments. When life expectancy improves for a cohort of patients, little information about reproduction, family planning, safe pregnancies, genetic                                                                                                                                                            | social platform | Not given | Online conferences for people with CF subdivided into adults, parents/children and young people. |                                                                                                                                                                                                                                                                                                                                                                                                                                                                                                                                                                                                                                                                                                                                                                                                                                                                                                                                                                                                                                                                                                                                                                                                                                                                                                                                                                                                                                                                                                                                                                                                                                                                                   |
| 22 | Colman AW, et al. Use of Quick Response (QR) coded bracelets and cards for the improvement of cortisol deficiency/Addison's disease management: An audit of quality of care of the management of steroid deficiency in acute illness. BMJ Innovations. 2018;4(3):115-22. | 2018 | UK (England) | Addison's disease            | Quick response coded bracelet                               | Research             | Journal article     | Adrenal crisis is life-threatening and requires swift intervention but is very rare                                                         | Study of HCPs - clinically needed / useful?                                                                                                                                                                                                                                                                                                                                                                                                                                                                                                                                                                                                                                      | website passive | Not given | Bracelet has a scannable QR code that links to emergency management information                  | Clinical need identified                                                                                                                                                                                                                                                                                                                                                                                                                                                                                                                                                                                                                                                                                                                                                                                                                                                                                                                                                                                                                                                                                                                                                                                                                                                                                                                                                                                                                                                                                                                                                                                                                                                          |
| 23 | Cox NS, et al. A web-based intervention to promote physical activity in adolescents and young adults with cystic fibrosis: protocol for a randomized controlled trial. BMC polim. 2019;19(1):253.                                                                        | 2019 | Australia    | Cystic fibrosis              | ActivOnline                                                 | Research             | Journal article     | Tailored exercise program without risk of infection                                                                                         |                                                                                                                                                                                                                                                                                                                                                                                                                                                                                                                                                                                                                                                                                  | website active  | Not given | internet-based physical activity program for 12 weeks for adolescents and young adults           | Protocol                                                                                                                                                                                                                                                                                                                                                                                                                                                                                                                                                                                                                                                                                                                                                                                                                                                                                                                                                                                                                                                                                                                                                                                                                                                                                                                                                                                                                                                                                                                                                                                                                                                                          |

|    | A                                                                                                                                                                                             | B    | C         | D                           | E                                                             | F                    | G                   | H                                                                                                                                               | I                                                                                                                                                                                                                                                                                                                                                                                                                                                                                                                            | J               | K                                                     | L                                                                                                                                                                                                                                                                                                                      | M                                                                                                                                                                                                                                                                                                                                                                                                                                                                                                                                                                                                                                                                                                               |
|----|-----------------------------------------------------------------------------------------------------------------------------------------------------------------------------------------------|------|-----------|-----------------------------|---------------------------------------------------------------|----------------------|---------------------|-------------------------------------------------------------------------------------------------------------------------------------------------|------------------------------------------------------------------------------------------------------------------------------------------------------------------------------------------------------------------------------------------------------------------------------------------------------------------------------------------------------------------------------------------------------------------------------------------------------------------------------------------------------------------------------|-----------------|-------------------------------------------------------|------------------------------------------------------------------------------------------------------------------------------------------------------------------------------------------------------------------------------------------------------------------------------------------------------------------------|-----------------------------------------------------------------------------------------------------------------------------------------------------------------------------------------------------------------------------------------------------------------------------------------------------------------------------------------------------------------------------------------------------------------------------------------------------------------------------------------------------------------------------------------------------------------------------------------------------------------------------------------------------------------------------------------------------------------|
| 24 | Cox NS, et al. Feasibility and acceptability of an Internet-Based program to promote physical activity in adults with cystic fibrosis. <i>Respiratory Care</i> . 2015;60(3):422-9.            | 2015 | Australia | Cystic fibrosis             | ActivOnline                                                   | Research             | Journal article     | Tailored exercise program without risk of infection                                                                                             |                                                                                                                                                                                                                                                                                                                                                                                                                                                                                                                              | website active  | Not given                                             | internet-based physical activity program for 8 weeks for adults. Also fortnightly phone consult                                                                                                                                                                                                                        | Feasible and acceptable                                                                                                                                                                                                                                                                                                                                                                                                                                                                                                                                                                                                                                                                                         |
| 25 | Cummings E, et al. Enhancing self-efficacy for self-management in people with cystic fibrosis. <i>Studies in Health Technology and Informatics</i> . 2011;169:33-37.                          | 2011 | Australia | Cystic fibrosis             |                                                               |                      |                     | Complicated self-management                                                                                                                     | Health mentoring project with 3 groups: (1) Self-efficacy web-based program + mentor via phone, (2) mentor via phone + self-efficacy program +App, (3) usual care.                                                                                                                                                                                                                                                                                                                                                           | App             | English                                               | App consisted on Symptom diary plus optional feedback on progress                                                                                                                                                                                                                                                      | Results show the intervention was generally considered to be useful and allowed CF individuals to focus on changes in symptoms. Self-efficacy increased in subjects in both intervention groups, but it is unclear from the results if the application provided additional benefits beyond supporting the mentoring intervention.                                                                                                                                                                                                                                                                                                                                                                               |
| 26 | D'Ambrosio C. Open versus closed social networking groups. <i>Haemophilia</i> . 2014;3:183.                                                                                                   | 2014 | USA       | Bleeding disorders in women | MyGirlsBlood                                                  | publicly available   | Conference abstract | Little information for this group of women; social isolation                                                                                    | Debate over whether open or closed group better. Closed for safety discussing personal details but reinforces it as a "secret" and shuts out others who may help / get it on the research agenda.                                                                                                                                                                                                                                                                                                                            | social platform | Not given                                             | Open group (not closed) on Facebook where people can ask questions or share experiences.                                                                                                                                                                                                                               | Having closed social networks are needed for groups that need privacy and security in their communications. WWBD need privacy to learn from one another and to solve intimate problems. However, when there are only closed groups, awareness ceases to exist across the larger multi-disciplinary and diverse worldwide community. Many would like to help, but would not be permitted in a closed group for WWBD.                                                                                                                                                                                                                                                                                             |
| 27 | Decker K, Meilleur C. CBDR and MyCBDR advancing hemophilia nursing practice in Canada. Conference Abstract presented at Haemophilia; May, 2018                                                | 2018 | Canada    | Haemophilia                 | MyCBDR (linked to Canadian Bleeding Disorder Registry (CBDR)) | limited availability | Conference abstract | Complicated self-management                                                                                                                     | Better outcomes from new treatment regimes but requires detailed record keeping to accurately monitor bleeding episodes, factor usage and adherence to treatment regimens.                                                                                                                                                                                                                                                                                                                                                   | App             | Not reported                                          | Links to CBDR - app allows people with a bleeding disorder to add track infusions and symptoms. Data available to all Haemophilia Treatment Centres in Canada meaning greater integration of specialist services.                                                                                                      | Useful tool that allows access to detailed information to the care teams and by implication, better treatment outcomes                                                                                                                                                                                                                                                                                                                                                                                                                                                                                                                                                                                          |
| 28 | Fidika A, et al. A web-based psychological support program for caregivers of children with cystic fibrosis: A pilot study. <i>Health and Quality of Life Outcomes</i> . 2015;13(1)            | 2015 | Germany   | Cystic fibrosis             | WEP-CARE                                                      | Research             | Journal article     | Parents caring for a child with Cystic Fibrosis (CF) are at high risk for psychological distress and have limited access to psychological care. | Severe distress not unusual. Lack of appropriate and knowledgeable support.                                                                                                                                                                                                                                                                                                                                                                                                                                                  | website active  | Not given                                             | Web-based writing therapy - 9 sessions, tailored for the specific needs of caregivers. Written assignments that were given feedback within 48 hours. The intervention program was provided by two trained and supervised psychotherapists with expertise in psychosocial care for patients with CF and their families. | On average, the caregivers' symptoms of anxiety decreased statistically significant and clinical relevant about five points from an elevated (M=11.4; SD =2.6) to a normal level (M=6.7; SD =2.6; p < .001) between pre and post treatment. Fear of disease progression (p < .001) and symptoms of depression (p = .02) significantly decreased as well. Quality of life significantly improved (p = .01). The effects were maintained at the 3-months follow-up assessment.                                                                                                                                                                                                                                    |
| 29 | Floch J, et al. Users' Experiences of a Mobile Health Self-Management Approach for the Treatment of Cystic Fibrosis: Mixed Methods Study. <i>JMIR mHealth and uHealth</i> . 2020;8(7):e15896. | 2020 | Europe    | Cystic fibrosis             | MyCyFAPP                                                      | Research             | Journal article     | Complicated self-management                                                                                                                     | Overall positive experience but food recording was seen as too complicated. Once people met their goals, lost motivation to continue using the app. HCPs also reported that information communicated by patients is more reliable and accurate. Normally, patients do not record data systematically. They forget details or get information mixed up. Empowering patients to record events at the time they occur, HCPs felt that the data they receive are more precise and better reflect the reality of patients' status | App             | Dutch, English, Flemish, Italian, Portuguese, Spanish | Food diary, nutrition follow-up (goals), symptoms diary (health diary), nutrition educational material (living with CF) and messages among other functions                                                                                                                                                             | Patients and parents had different skills, requiring follow-up by HCPs in an introductory phase. HCPs valued obtaining precise information about the patients, allowing for more personalized advice. However, the tight follow-up of several patients led to an increased workload. Over time, as patient self-efficacy increased, patient motivation for using the app decreased and the quality of the reported data was reduced. They suggest focusing on patients with poor control using the app; all patients using it for the week before a consult. Introducing all the features of the app at once can be overwhelming - staged approach better. Personalising it with help from the HCP also useful. |

|    | A                                                                                                                                                                                                                            | B    | C          | D                                     | E                                                    | F                    | G                   | H                                                                                                                         | I                                                                                                                                                                                       | J               | K            | L                                                                                                                                                                                                        | M                                                                                                                                                                                                                                                                                                                                                                                                                                                                                                                                |
|----|------------------------------------------------------------------------------------------------------------------------------------------------------------------------------------------------------------------------------|------|------------|---------------------------------------|------------------------------------------------------|----------------------|---------------------|---------------------------------------------------------------------------------------------------------------------------|-----------------------------------------------------------------------------------------------------------------------------------------------------------------------------------------|-----------------|--------------|----------------------------------------------------------------------------------------------------------------------------------------------------------------------------------------------------------|----------------------------------------------------------------------------------------------------------------------------------------------------------------------------------------------------------------------------------------------------------------------------------------------------------------------------------------------------------------------------------------------------------------------------------------------------------------------------------------------------------------------------------|
| 30 | Gow J, et al. Participation in patient support forums may put rare disease patient data at risk of re-identification. Orphanet Journal of Rare Diseases. 2020;15(1)                                                          | 2020 | UK         | Rare diseases                         | Social support groups generally for people with RD   | publicly available   | Journal article     | Vulnerable to re-identification on social support platforms                                                               | Online social support groups may not have sufficient security to prevent malicious matching of health and personal data to re-identify anonymised data                                  | social platform |              |                                                                                                                                                                                                          |                                                                                                                                                                                                                                                                                                                                                                                                                                                                                                                                  |
| 31 | Grande SW, et al. Improving care for pediatric cystic fibrosis in Sweden using a successful mHealth patient support system. Conference Abstract presented at Pediatric Pulmonology; September, 2017.                         | 2017 | Sweden     | Cystic fibrosis                       | Genia                                                | limited availability | Conference abstract | Complicated self-management/tracking symptoms and treatments                                                              | Parents don't always recall symptoms and treatments for their child making it hard for HCPs to accurately assess the patient.                                                           | App             | Not reported | Patients/parents record daily health observations and complete reports about symptoms, medications, and goals immediately prior to a clinic appointment. Data available to HCPs at the consult.          | High uptake at the study hospital; HCP took QI approach to its implementation. Considered to have improved coordination and patient-provider consensus without greater HCP burden.                                                                                                                                                                                                                                                                                                                                               |
| 32 | Guilliams JM, et al. Feasibility and usefulness of a mobile health exercise intervention in women with lymphangioma myomatosis. Conference Abstract presented at Cardiopulmonary Physical Therapy Journal; July, 2021.       | 2021 | Not given  | Lymphangioma myomatosis (LAM)         | Home based exercise program for women with LAM       | Research             | Conference abstract | Require tailored exercise program                                                                                         | Patients have reduced lung function and exercise tolerance; and a recent report indicates lower physical activity levels in LAM compared to patients with COPD and healthy populations. | App             | Not reported | App on smartphone with interfacing wearable and home monitoring devices. Check in with Physio weekly.                                                                                                    | 12 wk trial. Initial findings indicate feasibility and usefulness of an mHealth home exercise program for LAM, including good patient adherence and satisfaction with the program.                                                                                                                                                                                                                                                                                                                                               |
| 33 | Haik D, et al. The Online Support Group as a Community: A Thematic Content Analysis of an Online Support Group for Idiopathic Subglottic Stenosis. Annals of Otolaryngology, Rhinology and Laryngology. 2019;128(4):293-299. | 2019 | USA        | Idiopathic subglottic stenosis (iSGS) | Living With Idiopathic Subglottic Stenosis (LwiSGS), | publicly available   | Conference abstract | Access to information, sharing of experiences                                                                             |                                                                                                                                                                                         | social platform | Not given    | Online community specifically for people with iSGS                                                                                                                                                       | Analysis demonstrated that communications primarily encompassed three major thematic elements: (1) information sharing; (2) emotional support, expression, and experience sharing; and (3) community building. Positively toned posts grossly overshadowed negatively toned posts by almost a factor of 3. A significant portion of group members requested information from their peers, suggesting a high level of trust toward the resources provided in this group, even those involving a surgical procedure or medication. |
| 34 | Ho G, et al. Metabolic Diet App Suite for inborn errors of amino acid metabolism. Molecular Genetics and Metabolism. 2016;117(3):322-327.                                                                                    | 2016 | Canada     | Inborn errors of metabolism (IEM)     | Metabolic DietAppSuite                               | publicly available   | Journal article     | Burden of daily adherence to complex and time-consuming medical diet to attain metabolic control and prevent organ damage | Diet is only one of a number of competing priorities for people with IEM, but one of the most onerous. Poor nutritional labelling on many foods - restricts diet further.               | App             | Not reported | Online tool for mobile phones and desktops for 15 different IEMs. Creates a personalised dashboard including specific nutrient goals. Food diary, nutrient counts and able to add your homemade recipes. |                                                                                                                                                                                                                                                                                                                                                                                                                                                                                                                                  |
| 35 | Howard S, The All Wales Adult Cystic Fibrosis Centre (AWACFC) Virtual Instruction of Exercise with Technology to Enhance Care-VIEWTEC Programme. Journal of Cystic Fibrosis. 2014;2:520                                      | 2014 | UK (Wales) | Cystic fibrosis                       | VIEWTEC Programme                                    | Research             | Conference abstract | Patients live 2 and 3 hours away from treatment centre but benefit from tailored exercise programs                        | Group exercise is more motivating                                                                                                                                                       | telehealth      | Not given    | virtual exercise sessions with a CF Gym Instructor. Email invitations and delivered via Cisco Webex                                                                                                      | Feasible and patients liked it.                                                                                                                                                                                                                                                                                                                                                                                                                                                                                                  |

|    | A                                                                                                                                                                                                                                                                                           | B    | C               | D                                        | E                                                   | F        | G                   | H                                                                                                                           | I                                                                                                                                                  | J               | K                                                 | L                                                                                                                                                                                                                                                                                                                                                                                                                      | M                                                                                                                                                                                                                                                                                                                            |
|----|---------------------------------------------------------------------------------------------------------------------------------------------------------------------------------------------------------------------------------------------------------------------------------------------|------|-----------------|------------------------------------------|-----------------------------------------------------|----------|---------------------|-----------------------------------------------------------------------------------------------------------------------------|----------------------------------------------------------------------------------------------------------------------------------------------------|-----------------|---------------------------------------------------|------------------------------------------------------------------------------------------------------------------------------------------------------------------------------------------------------------------------------------------------------------------------------------------------------------------------------------------------------------------------------------------------------------------------|------------------------------------------------------------------------------------------------------------------------------------------------------------------------------------------------------------------------------------------------------------------------------------------------------------------------------|
| 36 | Huang X, et al. Developing and evaluating HE-APP: Acceptability and usability of a smartphone APP system to improve self-management in Chinese patients with hemophilia. Conference Abstract presented at Haemophilia; June, 2020                                                           | 2020 | China           | Haemophilia                              | HE-APP                                              |          | Conference abstract | Complicated self-management linked to outcomes                                                                              | Outcomes linked to self management and accurate symptom-tracking.                                                                                  | App             | Mandarin?                                         | (1) recording of bleeding symptoms; (2) monitoring of treatment adherence; (3) education, training and support system; (4) accounting and analysing the use of the medicine; and (5) recording the economic cost.                                                                                                                                                                                                      | Acceptability and susability levels high among patients and their parents. Small trial with 10 patients.                                                                                                                                                                                                                     |
| 37 | Ingravallo F, et al. Telemedicine with mobile internet devices for innovative multidisciplinary patientcentred care of patients with narcolepsy. Protocol of the randomized controlled trial TENAR (TElemedicine for NARcolepsy). European Journal of Neurology. 2020;27(Supplement 1):516. | 2020 | Italy           | Narcolepsy                               | TENAR trial (Protocol)                              | Research | Conference abstract | disease burden is increased by the need for traveling for medical consultations, with high costs for patients and families. |                                                                                                                                                    | telehealth      |                                                   |                                                                                                                                                                                                                                                                                                                                                                                                                        |                                                                                                                                                                                                                                                                                                                              |
| 38 | Kauw D, et al. The Contribution of Online Peer-to-Peer Communication Among Patients With Adrenal Disease to Patient-Centered Care. J Med Internet Res. 2015;17(3):e54.                                                                                                                      | 2015 | The Netherlands | Addison's disease and Cushing's syndrome | online forum moderated by the Dutch Adrenal Society |          | publicly available  | Journal article                                                                                                             | Peer-to-peer information sharing                                                                                                                   | social platform | Not given                                         | Public area and password prtected area. Rules for posting e.g., posting medical information - must provide references. Moderated by vounteers.                                                                                                                                                                                                                                                                         | Analysis of content: 81% asking for more info about the disease; 10% asking for emotional support; Answers mostly practical tips and sharing own experiences. Seen as an important information source. Social support in the form of experiential info and emotional support - not able to be obtained from HCPs.            |
| 39 | Khair K, et al. Social networking for adolescents with haemophilia. Haemophilia. 2011;17(2):369.                                                                                                                                                                                            | 2011 | UK              | Haemophilia                              | VivaSix                                             | Research | Conference abstract | Adherence to treatment difficult for adolescent boys with severe haemophilia                                                | Parents are offtensole source of information outside of HCPs. Few know of other boys with haemophilia                                              | social platform | Not given                                         | Restricted social network for boys 11-18 years with severe haemophilia. Will include games and other features to promote sharing of self management skills.                                                                                                                                                                                                                                                            |                                                                                                                                                                                                                                                                                                                              |
| 40 | Khair K, et al. The role of social networking in haemophilia management. Haemophilia. 2010;4):129-130.                                                                                                                                                                                      | 2010 | UK              | Haemophilia                              | hiFive                                              | Research | Conference abstract | Adherence to treatment difficult for adolescent boys with severe haemophilia                                                | Parental influence lessens. Potential for peer to peer transmission of self management skills                                                      | social platform | Not given                                         | hiFive - small group for 11-19 year olds living with severe haemophilia. Closed to parents.                                                                                                                                                                                                                                                                                                                            |                                                                                                                                                                                                                                                                                                                              |
| 41 | Kirk S, Milnes L. An exploration of how young people and parents use online support in the context of living with cystic fibrosis. Health expectations. 2016;19(2):309-321.                                                                                                                 | 2016 | UK              | Cystic fibrosis                          | Online forum for people with CF                     | Research | Journal article     | Can be hard to find information and support for people with a rare disease or caring for a child with a rare disease        |                                                                                                                                                    | social platform | Not given                                         | Participants exchanged experientially derived advice and views on how to manage treatments, emotions, relationships, identity and support from services. While parents sought information and support on managing specific therapies/services and ways of maintaining their child's health, the information and support young people desired appeared to be more directed at how to 'fit' CF into their everyday lives | Online support groups appear to supplement professional support in relation to self-management. They enable young people and parents to share experiences, feelings and strategies for living with long-term conditions with peers and develop the expertise to empower them in interactions with health-care professionals. |
| 42 | Kühnte L, et al. Development of a Social Network for People Without a Diagnosis (RarePairs): Evaluation Study. J Med Internet Res. 2020;22(9):e21849                                                                                                                                        | 2020 | Germany         | Undiagnosed rare diseases                | RarePairs                                           | Research | Journal article     | Diagnostic delay is a regular feature of rare diseases                                                                      | Diagnosis can be difficult with limited infromation and experience of rare diseases. This uses information from a database of 973 diagnosed people | social platform | German, English, Chinese, Portuguese, and Finnish | Social network platform with built in algorithm to match individuals with similar disease burden in the lead up to diagnosis.                                                                                                                                                                                                                                                                                          |                                                                                                                                                                                                                                                                                                                              |

|    | A                                                                                                                                                                                             | B    | C            | D                                  | E                                                                     | F                    | G                   | H                                                                                                      | I                                                                                                                                                                   | J               | K               | L                                                                                                                                                                                                                                                                                                                                                                                                                                  | M                                                                                                                                                      |
|----|-----------------------------------------------------------------------------------------------------------------------------------------------------------------------------------------------|------|--------------|------------------------------------|-----------------------------------------------------------------------|----------------------|---------------------|--------------------------------------------------------------------------------------------------------|---------------------------------------------------------------------------------------------------------------------------------------------------------------------|-----------------|-----------------|------------------------------------------------------------------------------------------------------------------------------------------------------------------------------------------------------------------------------------------------------------------------------------------------------------------------------------------------------------------------------------------------------------------------------------|--------------------------------------------------------------------------------------------------------------------------------------------------------|
| 43 | Lassandro G, et al. EMO.TI.ON.: Technologies for the safety of children with hemophilia. Blood Transfusion; November 2017. p. s539.                                                           | 2017 | Italy        | Haemophilia                        | EMO.TI.ON. system                                                     | Research             | Conference abstract | Home care decreasing reliance on hospital                                                              | Diagnosing suspected bleeds into joints requiring hospital visit for diagnosis                                                                                      | telehealth      | Not given       | an ultrasound diagnostic solution using at home by parents or caregivers. Moreover, the system can transfer, live, images by world wide web to specialist physician creating a network. The solution will be achieved by attending the design related to familiarization processes. Other function of the system are: teleconsulting tools, semantic scientific search, recording data (i.e. clinical chart, infusional diary...). | Ongoing trial but results of parent use comparable to HCP use.                                                                                         |
| 44 | Lee Yeong J, et al. A Newly Developed Web-Based Resource on Genetic Eye Disorders for Users With Visual Impairment (Gene.Vision): Usability Study. J Med Internet Res. 2021;23(1):e19151.     | 2021 | UK (England) | Genetic eye disorders              | Gene.Vision                                                           | Research             | Journal article     | Educational web-based materials need to be accessible by people with low vision                        |                                                                                                                                                                     | website passive | Not given       | Gene.vision web site on genetic eye disorders optimised for people with vision problems                                                                                                                                                                                                                                                                                                                                            |                                                                                                                                                        |
| 45 | Lewis T. Improving quality of life in patients with cystic fibrosis with exercise: CF foundation impact grant update. Conference Abstract presented at Pediatric Pulmonology; October, 2019.  | 2019 | USA          | Cystic fibrosis                    | Exercise program via App                                              | Research             | Conference abstract | Require tailored exercise program in isolation                                                         | Deliver an at home exercise program to people with CF - indirect supervision by exercise physiologist.                                                              | App             | English         | Guided exercise program (3 levels to choose from) and assessment tasks. Supported by live recorded discussions and Q and A sessions.                                                                                                                                                                                                                                                                                               | Suggests it is feasible and could lead to improvements in QoL                                                                                          |
| 46 | Lomotey RK, et al. Mobile self-management guide for young men with mild hemophilia in cases of minor injuries. Network Modeling Analysis in Health Informatics and Bioinformatics. 2014;3(1). | 2014 | Canada       | Haemophilia                        | Hemophilia Injury Recognition Tool ("HIRT?")                          | limited availability | Journal article     | Patients may be slow to recognise injuries if their disease is mild                                    | People with mild haemophilia may only experience bleeds after a significant injury and so not recognise sequelae of milder events - not seek appropriate treatment. | App             | English, French | Structured assessment of suspected bleeds plus appropriate first-aid if needed. If more help required, phone number of all Haemophilia Treatment Centres in Canada are given to enquire about further management.                                                                                                                                                                                                                  | High usability for all users whether tech savvy or not.                                                                                                |
| 47 | Manu-Pereira MM, et al. ENERCA: Towards a European Reference Network (ERN) in rare haematological diseases. British Journal of Haematology. 2016;173(Supplement 1):39-40.                     | 2016 | Europe       | Rare and Congenital Anaemias       | e-ENERCA (European Network for Rare and Congenital Anaemias (ENERCA)) | Research             | Conference abstract | Distance from specialist centres, lack of relevant information and need to share data with expert HCP. | European reference Networks - hub and spoke model for rare disease care                                                                                             | website active  | Not given       | 3 separate platforms linked to the e-ENERCA website 1) e-Registry, a Pan European registry of RAs for epidemiological surveillance 2) e-Learning for the dissemination of knowledge, continuous medical education, and best practices awareness, and 3) Telemedicine, a platform to provide expertise, at distance, for complex cases.                                                                                             |                                                                                                                                                        |
| 48 | Moon H, Moon J. Comparative readability analysis of information on exercise for hemophilia patients. Haemophilia. 2021;27(SUPPL 2):57.                                                        | 2021 | South Korea  | Haemophilia                        | Existing online exercise programs for Haemophilia                     | publicly available   | Conference abstract | Tailored online exercise programs need to be understandable.                                           | Readability and other access features not always present                                                                                                            | website passive | Not given       | Existing web-based resources                                                                                                                                                                                                                                                                                                                                                                                                       | Sites had higher than recommended readability scores and came low down in search algorithm rankings making them hard to find.                          |
| 49 | Naik H, et al. Experience with a pilot skype internet support group for symptomatic patients with acute intermittent porphyria. Clinical Chemistry and Laboratory Medicine. 2013;51(5):eA10.  | 2013 | USA          | Acute Intermittent Porphyria (AIP) | Skype support group mediated by HCPs                                  | Research             | Conference abstract | Psychosocial and emotional isolation leading to poor mental health in this group                       | Life-threatening acute episodes - painful with sequelae - chronic symptoms. Poorly understood psychosocial needs.                                                   | social platform | Not given       | Skype support group mediated by a porphyria expert physician, and the genetic counselor/coordinator of the porphyria clinic and an available psychologist with 4 women with AIP.                                                                                                                                                                                                                                                   | Participants reported that this was a very comforting experience, reducing the feeling of isolation and increasing their understanding of the disease. |

|    | A                                                                                                                                                                                                                                                        | B    | C       | D                                                                            | E                                                                                                                                        | F                    | G                   | H                                                                                                                                                                               | I                                                                                                                                                                                                                                                                                                                                                                                                                                                                                                                  | J              | K                           | L                                                                                                                                                                                                                                                                                                                                                                                                                                                                                                                                                                                       | M                                                                                                  |
|----|----------------------------------------------------------------------------------------------------------------------------------------------------------------------------------------------------------------------------------------------------------|------|---------|------------------------------------------------------------------------------|------------------------------------------------------------------------------------------------------------------------------------------|----------------------|---------------------|---------------------------------------------------------------------------------------------------------------------------------------------------------------------------------|--------------------------------------------------------------------------------------------------------------------------------------------------------------------------------------------------------------------------------------------------------------------------------------------------------------------------------------------------------------------------------------------------------------------------------------------------------------------------------------------------------------------|----------------|-----------------------------|-----------------------------------------------------------------------------------------------------------------------------------------------------------------------------------------------------------------------------------------------------------------------------------------------------------------------------------------------------------------------------------------------------------------------------------------------------------------------------------------------------------------------------------------------------------------------------------------|----------------------------------------------------------------------------------------------------|
| 50 | Nicholl H, et al. Internet Use by Parents of Children With Rare Conditions: Findings From a Study on Parents' Web Information Needs. <i>J Med Internet Res</i> . 2017;19(2):e51.                                                                         | 2017 | Ireland | Rare diseases                                                                | Hypothetical                                                                                                                             | publicly available   | Journal article     | Recommendations for a consumer facing website                                                                                                                                   | <ul style="list-style-type: none"> <li>The content needs to be relevant, accurate, trustworthy, and up to date.</li> <li>The topics most frequently searched for (Table 5) need to be addressed.</li> <li>It should contain a Web-based forum or a social network component.</li> <li>The website should be integrated with social media and be mobile friendly.</li> </ul>                                                                                                                                        | other          |                             |                                                                                                                                                                                                                                                                                                                                                                                                                                                                                                                                                                                         |                                                                                                    |
| 51 | Nilson J, et al. Are you HIRT? (Hemophilia Injury Recognition Tool): Perceptions of the mobile app on injury self-management from young men with mild hemophilia in Canada. Conference Abstract presented at Haemophilia; July, 2016.                    | 2016 | Canada  | Haemophilia                                                                  | Hemophilia Injury Recognition Tool ("HIRT?")                                                                                             | limited availability | Conference abstract | Patients may be slow to recognise injuries if their disease is mild                                                                                                             | People with mild haemophilia may only experience bleeds after a significant injury and so not recognise sequelae of milder events - not seek appropriate treatment.                                                                                                                                                                                                                                                                                                                                                | App            | English, French             | Structured assessment of suspected bleeds plus appropriate first-aid if needed. If more help required, phone number of all Haemophilia Treatment Centres in Canada are given to enquire about further management.                                                                                                                                                                                                                                                                                                                                                                       | Increased confidence dealing with injuries but no change in self management                        |
| 52 | Osara Y, et al. Development of newborn screening connect (NBS connect): a self-reported patient registry and its role in improvement of care for patients with inherited metabolic disorders. <i>Orphanet Journal Of Rare Diseases</i> . 2017;12(1):132. | 2017 | USA     | Phenylketonuria (PKU), maple syrup urine disease (MSUD) or tyrosinemia (TYR) | Newborn Screening Connect (NBS Connect)                                                                                                  |                      | Journal article     | Patients/carers isolated by rareness of disease.                                                                                                                                | Linking patients/carers with information. Registries are generating useful data and contributing to the research agenda.                                                                                                                                                                                                                                                                                                                                                                                           | website active | Not given                   | Registry - patient initiated and enters data. Resources such as education materials, information on the latest research and clinical trials, recipes, interactive health tracking systems, and professional support tools                                                                                                                                                                                                                                                                                                                                                               |                                                                                                    |
| 53 | Paglialonga A, et al. eHealth for patients with rare diseases: the eHealth Working Group of the European Reference Network on Rare Multisystemic Vascular Diseases (VASCERN). <i>Orphanet Journal of Rare Diseases</i> . 2021;16(1):164.                 | 2021 | Europe  | Rare Multisystemic Vascular Diseases                                         | Mobile app developed by VASCERN (European Reference Network on Rare Multisystemic Vascular Diseases); Pills of Knowledge YouTube channel | limited availability | Journal article     | (1) Finding a suitable expert; (2) finding a patient support agency; (3) need for timely info about the patient in an emergency situation; (4) information needs of the patient | (1) In Europe can mean travelling across borders, languages - incurring time and money. Difficult to find appropriate RD expert. This RD is multisystem so may need several specialists; (2) Not always named after your disease / group of diseases (3) Paper records carried by the patient are common but may be lost and can only contain a limited amount of information; (4) High quality and easy to understand - combining patient and carer needs, HCP expertise and patient advocacy agency perspectives | App            | Multiple European languages | However, further research is needed as digital patient passports may also pose new challenges, for example in terms of data management, patient privacy, informed consent, and control of shared data. In addition, digital passports may not necessarily fit the needs of every patient with the disease as, for example, people with limited digital skills and people not willing to use a smartphone to handle clinical issues might still prefer to use conventional paper documents. Issues about confidentiality and ethical rules in various EU countries, remain to be solved. |                                                                                                    |
| 54 | Parrott H, et al. A digital solution for virtual consultation and sharing health data in adults with cystic fibrosis. <i>Journal of Cystic Fibrosis</i> . 2019;18(Supplement 1):S51                                                                      | 2019 | UK      | Cystic fibrosis                                                              | Virtual consults and remote monitoring                                                                                                   | Research             | Conference abstract | Frequent clinic visits are having a huge impact on the quality of life.                                                                                                         | Also growing cohort of patients as they are living longer - concerns about Health system capacity                                                                                                                                                                                                                                                                                                                                                                                                                  | telehealth     | Not given                   | Virtual clinics and spirometry done by patients at home                                                                                                                                                                                                                                                                                                                                                                                                                                                                                                                                 | Considerable savings of time for both patients and clinicians. So far no issues. Patients like it. |
| 55 | Polineni D, et al. A stakeholder-informed feasibility study of tele-coaching to improve treatment adherence in patients with cystic fibrosis. <i>Pediatric Pulmonology</i> . 2017;52(Supplement 47):479.                                                 | 2017 | USA     | Cystic fibrosis                                                              | Tele-coaching                                                                                                                            | Research             | Conference abstract | Adherence to treatment not optimal                                                                                                                                              | Proposed intervention= tele-coaching                                                                                                                                                                                                                                                                                                                                                                                                                                                                               | telehealth     |                             |                                                                                                                                                                                                                                                                                                                                                                                                                                                                                                                                                                                         |                                                                                                    |



|    | A                                                                                                                                                                                                                                          | B    | C                    | D                                | E                                               | F                  | G                   | H                                                                                        | I                                                                                                                                                                                                                                                                                           | J               | K            | L                                                                                                                                                                                                                         | M                                                                                                                                                                                                                                                                                                                                                                                                                                                                                                                                                                                                                                                                                                                                                                                                                                                                                                                                                                                                                                                                                      |
|----|--------------------------------------------------------------------------------------------------------------------------------------------------------------------------------------------------------------------------------------------|------|----------------------|----------------------------------|-------------------------------------------------|--------------------|---------------------|------------------------------------------------------------------------------------------|---------------------------------------------------------------------------------------------------------------------------------------------------------------------------------------------------------------------------------------------------------------------------------------------|-----------------|--------------|---------------------------------------------------------------------------------------------------------------------------------------------------------------------------------------------------------------------------|----------------------------------------------------------------------------------------------------------------------------------------------------------------------------------------------------------------------------------------------------------------------------------------------------------------------------------------------------------------------------------------------------------------------------------------------------------------------------------------------------------------------------------------------------------------------------------------------------------------------------------------------------------------------------------------------------------------------------------------------------------------------------------------------------------------------------------------------------------------------------------------------------------------------------------------------------------------------------------------------------------------------------------------------------------------------------------------|
| 56 | Richesson RL, et al. An automated communication system in a contact registry for persons with rare diseases: Scalable tools for identifying and recruiting clinical research participants. Contemporary Clinical Trials. 2009;30(1):55-62. | 2009 | USA                  | Rare diseases                    | Notifications of relevant new research projects | Research           | Journal article     | Patients have a lack of access to new trials; Researchers - hard to recruit patients     | All related to rarity of the conditions                                                                                                                                                                                                                                                     | website passive | Not given    | web-based automated system generates periodic and customized communications to notify registrants of relevant studies in the NIH Rare Diseases Clinical Research Network (RDCRN).                                         |                                                                                                                                                                                                                                                                                                                                                                                                                                                                                                                                                                                                                                                                                                                                                                                                                                                                                                                                                                                                                                                                                        |
| 57 | Rits S, et al. Weekly patient webcasts: An adult CF center's response to the COVID-19 pandemic. Conference Abstract presented at Pediatric Pulmonology; October, 2020.                                                                     | 2020 | USA                  | Cystic fibrosis                  | Webcasts on COVID                               | publicly available | Conference abstract | Urgent need for disease specific information during COVID pandemic                       | Plenty of information for the general public but not for people with a rare disease. Concerns from people with CF adequate infection control, access to care, medications and supplies, clinical outcomes as they relate to CF, employment status and disability, and overall mental health | other           | Not given    | Weekly webcasts on COVID made available Could ask questions through Google form. Email notification out to patients and carers.                                                                                           |                                                                                                                                                                                                                                                                                                                                                                                                                                                                                                                                                                                                                                                                                                                                                                                                                                                                                                                                                                                                                                                                                        |
| 58 | Rodman J, et al. Patient perspectives on electronic access to registry health records: An Irish-Slovene online survey. Journal of Cystic Fibrosis. 2016;15(Supplement 1):S36.                                                              | 2016 | Ireland and Slovenia | Cystic fibrosis                  | European CF Registry                            | Research           | Conference abstract | Lack of patient access to their own medical records                                      | Thought to be useful for self management                                                                                                                                                                                                                                                    | website active  | Not given    | Hypothetical access to the Register                                                                                                                                                                                       | Patients in favour of it but concerned about security                                                                                                                                                                                                                                                                                                                                                                                                                                                                                                                                                                                                                                                                                                                                                                                                                                                                                                                                                                                                                                  |
| 59 | Rudolf I, et al. Assessment of a Mobile App by Adolescents and Young Adults With Cystic Fibrosis: Pilot Evaluation. JMIR mHealth and uHealth. 2019;7(11):e12442.                                                                           | 2019 | Germany              | Cystic fibrosis                  | Kinderhilfe Organtransplantation (KIOAPP)       | publicly available | Journal article     | Lung function decline in transition from 12 and 24 years.                                | Improving self management and independence from parents important for ongoing outcomes. Poor self management only slowly manifests itself.                                                                                                                                                  | App             | ?German      | App contains a diary function for recording vital signs and personal observations, communication platform for sending information to the HCP, a medication plan, and medication reminder function. Age appropriate format | Perceived as useful and supportive overall. Most useful feature was the medication plan and reminders. Diary use became less frequent quickly at odds with its high usefulness rating.                                                                                                                                                                                                                                                                                                                                                                                                                                                                                                                                                                                                                                                                                                                                                                                                                                                                                                 |
| 60 | Ruther DF, et al. Mobile app requirements for patients with rare liver diseases: A single center survey for the ERN RARE-LIVER. Clinics and Research in Hepatology and Gastroenterology. 2021;45(6).                                       | 2021 | Europe               | autoimmune liver diseases (AILD) | Hypothetical                                    | Research           | Journal article     | Research into what consumers want in a Rare Liver disorder app                           |                                                                                                                                                                                                                                                                                             | App             | Not reported | Hypothetical                                                                                                                                                                                                              | A substantial majority of patients expected to benefit from the app due to constant access to health data (81%), better overview of the course of the disease (80%), better understanding of the disease (70%) and faster detection of drug side effects (64%). only the minority of patients believed that an app could help to improve quality of life (21%), reduce fears associated with the disease (24%), reduce mistakes in taking medication (32%) or improve medication adherence (37%) (Fig. 3). Significantly desired features were information on new developments (93%), access to one's own medical records (89%), notifications to practitioner in case of concerns (84%), automatic ordering of follow-up prescriptions (81%), information on clinical trials (79%), disease information (79%) and recording of health concerns with symptom trackers (73%). In contrast, significantly undesired features were gamification or reward system (5%), networking (27%) and comparisons (35%) with other persons affected (Fig. 3). Did not all match with HCP responses. |
| 61 | Sottiolotta G, et al. The HEMONLINE project: Preliminary results. Haemophilia. 2012;3:77.                                                                                                                                                  | 2012 | Italy                | Haemophilia                      | HEMONLINE                                       | Research           | Conference abstract | Distance to treatment centre burdensome and results in expenses including loss of wages. |                                                                                                                                                                                                                                                                                             | telehealth      | Not given    | Web-cam and internet connection provided to patients to allow them to contact HCPs in addition to in person home visits by the MDT                                                                                        | In progress but suggests better use of health services and patient satisfaction                                                                                                                                                                                                                                                                                                                                                                                                                                                                                                                                                                                                                                                                                                                                                                                                                                                                                                                                                                                                        |



|    | A                                                                                                                                                                                                                                                                                  | B    | C                   | D                                     | E                                      | F                    | G                   | H                                                                                                                                    | I                                                                                                                                                                                                                                                                                                                                    | J               | K                 | L                                                                                                                                                                                                                                                                                                                                                                  | M                                                             |
|----|------------------------------------------------------------------------------------------------------------------------------------------------------------------------------------------------------------------------------------------------------------------------------------|------|---------------------|---------------------------------------|----------------------------------------|----------------------|---------------------|--------------------------------------------------------------------------------------------------------------------------------------|--------------------------------------------------------------------------------------------------------------------------------------------------------------------------------------------------------------------------------------------------------------------------------------------------------------------------------------|-----------------|-------------------|--------------------------------------------------------------------------------------------------------------------------------------------------------------------------------------------------------------------------------------------------------------------------------------------------------------------------------------------------------------------|---------------------------------------------------------------|
| 62 | Stevenson Won A, et al. Assessing the Feasibility of an Open-Source Virtual Reality Mirror Visual Feedback Module for Complex Regional Pain Syndrome: Pilot Usability Study. J Med Internet Res. 2021;23(5):e16536.                                                                | 2021 | USA                 | Complex regional pain syndrome (CRPS) | Virtual Reality Visual Feedback Module | Research             | Journal article     | Few treatment options for CRPS.                                                                                                      | Mirror visual feedback therapies promising. Can be delivered using VR but costly and not so far popular. Now cheaper and HCPs developing skills to deliver it                                                                                                                                                                        | Website active  | Not reported      | HCP led VR sessions in a clinic with a view to extending it to home use. Provides therapy platform and information.                                                                                                                                                                                                                                                | Did not improve pain but usability, feasibility and all good. |
| 63 | Storf H, et al. Vision and challenges of a cartographic representation of expert medical centres for rare diseases. Studies in health technology and informatics. 2014;205:677-81.                                                                                                 | 2014 | Germany             | Rare diseases                         | se-atlas                               | Research             | Journal article     | Difficult for people with rare diseases to find appropriate specialist centre in Germany                                             |                                                                                                                                                                                                                                                                                                                                      | website active  | Not given         | Interactive map and list                                                                                                                                                                                                                                                                                                                                           |                                                               |
| 64 | Timmer AM, et al. A Blended Physiotherapy Intervention for Persons With Hemophilic Arthropathy: Development Study. J Med Internet Res. 2020;22(6):e16631.                                                                                                                          | 2020 | Netherlands         | Haemophilia                           | e-Exercise HA                          | Research             | Journal article     | Few PTs understand haemophilic arthropathy and so access to one is difficult for this common complication; Cost of specialist physio | most critical barriers to adhering to physiotherapy were the limited reimbursement by the health insurance, execution of boring exercises, and stubbornness of the patients to accept advice. The patients mentioned that a good relationship with their physiotherapist facilitated their adherence to the physiotherapy treatment. | website active  | Not given         | A 12-week blended intervention was developed, integrating face-to-face physiotherapy sessions with a web-based app. The intervention consists of information modules for persons with HA and information modules for physiotherapists, a graded activity program using a self-chosen activity, and personalized video-supported exercises. The information modules |                                                               |
| 65 | Verkleij M, et al. Development and evaluation of an internet-based cognitive behavioral therapy intervention for anxiety and depression in adults with cystic fibrosis (eHealth CF-CBT): An international collaboration. Internet Interventions. 2021;24.                          | 2021 | Netherlands         | Cystic fibrosis                       | eHealth CF-CBT                         | Research             | Journal article     | Anxiety and depression in people with CF common and can affect adherence, health and QoL                                             | Access to evidence-based mental health care can be limited adding to the cost and burden of care for people with CF.                                                                                                                                                                                                                 | website active  | English and Dutch | Internet delivered CBT sessions guided by a therapist. Trialled with 16 people with CF                                                                                                                                                                                                                                                                             | high levels of acceptability and usability                    |
| 66 | Verkleij M, et al. Development of a therapist-guided internet-delivered cognitive behavioral therapy intervention for anxiety and depression in adults with cystic fibrosis (e-Health CF-CBT): An international collaboration. Pediatric Pulmonology. 2019;54(Supplement 2):406-7. | 2019 | Netherlands         | Cystic fibrosis                       | eHealth CF-CBT                         | Research             | Conference abstract | Anxiety and depression in people with CF common and can affect adherence, health and QoL                                             | Access to evidence-based mental health care can be limited adding to the cost and burden of care for people with CF.                                                                                                                                                                                                                 | website active  | English and Dutch | Pilot Internet delivered CBT sessions guided by a therapist                                                                                                                                                                                                                                                                                                        |                                                               |
| 67 | Verkleij M, et al. Development and evaluation of an internet-based cognitive behavioral therapy intervention for anxiety and depression in adults with cystic fibrosis: An international collaboration. Pediatric Pulmonology. 2020;55(SUPPL 2):267.                               | 2020 | Netherlands         | Cystic fibrosis                       | eHealth CF-CBT                         | Research             | Conference abstract | Anxiety and depression in people with CF common and can affect adherence, health and QoL                                             | Access to evidence-based mental health care can be limited adding to the cost and burden of care for people with CF.                                                                                                                                                                                                                 | website active  | English and Dutch | Internet delivered CBT sessions guided by a therapist. Trialled with 16 people with CF                                                                                                                                                                                                                                                                             | High levels of acceptability and usability                    |
| 68 | Wagner B, et al. Establishing an online physical exercise program for people with hemophilia. Wiener Klinische Wochenschrift. 2019;131(21-22):558-66.                                                                                                                              | 2019 | Germany and Austria | Haemophilia                           | online exercise program                | limited availability | Journal article     | Distance to attend exercise program at the specialist centre not feasible                                                            |                                                                                                                                                                                                                                                                                                                                      | website passive | Not given         | Online exercise lessons for adults and young people conducted by physician. Also have consultation hours (? Online) when you can speak to someone at the clinic about the program)                                                                                                                                                                                 |                                                               |

|    | A                                                                                                                                                                                                                                | B    | C         | D                              | E                                                       | F                  | G               | H                                                                                         | I                                                                          | J               | K            | L                                                                                                                                                                                                                    | M                                                                                                                                                                                                                                                                                                                                                                                                                                                                                                                                                                                       |
|----|----------------------------------------------------------------------------------------------------------------------------------------------------------------------------------------------------------------------------------|------|-----------|--------------------------------|---------------------------------------------------------|--------------------|-----------------|-------------------------------------------------------------------------------------------|----------------------------------------------------------------------------|-----------------|--------------|----------------------------------------------------------------------------------------------------------------------------------------------------------------------------------------------------------------------|-----------------------------------------------------------------------------------------------------------------------------------------------------------------------------------------------------------------------------------------------------------------------------------------------------------------------------------------------------------------------------------------------------------------------------------------------------------------------------------------------------------------------------------------------------------------------------------------|
| 69 | Walker KK. Cognitive and affective uses of a Thoracic Outlet Syndrome Facebook support group. 2014                                                                                                                               | 2014 | USA       | Thoracic Outlet Syndrome (TOS) | Thoracic Outlet Syndrome (TOS) Awareness Facebook group | publicly available | Journal article | Finding reliable information difficult for people with a rare disease                     | HCPs may not be knowledgeable. Support from peers difficult due to rarity. | social platform | Not given    | Facebook group for people with TOS                                                                                                                                                                                   | Analysis of cognitive needs indicated TOS patients used the site more to share information about their own TOS symptoms and journey with diagnosis than to seek information. Analysis of affective needs found patients were more likely to use the site to give support and encouragement to others than to express concerns and complaints. The complaints they did express were primarily related to their frustration with the general medical community's perceived inability to diagnose and understand their disease or to question a specific doctor's diagnosis/recommendation |
| 70 | Wittmeier K, et al. Analysis of a Parent-Initiated Social Media Campaign for Hirschsprung's Disease. J Med Internet Res. 2014;16(12):e288.                                                                                       | 2014 | Canada    | Hirschsprung's Disease         | Social media campaign "Shit happens"                    | publicly available | Journal article | Families of children with rare diseases can feel isolated and unsupported                 |                                                                            | social platform | English      | Social media campaign to raise awareness and provide support for families dealing with Hirschsprung's disease. Facebook, Twitter, Blog posts and question and answer style postings. Very engaging for the community | Analytics showed 5400 views of the blog from 37 countries. Across platforms - within 2 hours of posting a question could get 143 views, 20 responses increasing to 30 responses within 5 hours.                                                                                                                                                                                                                                                                                                                                                                                         |
| 71 | Wood J, et al. A smartphone application for reporting symptoms in adults with cystic fibrosis improves the detection of exacerbations: Results of a randomised controlled trial. Journal of Cystic Fibrosis. 2020;19(2):271-276. | 2020 | Australia | Cystic fibrosis                | Not given                                               | Research           | Journal article | Delayed reporting of symptoms can result in more severe exacerbations and worse outcomes. |                                                                            | App             | Not reported | 12 questions re symptoms associated with exacerbation that alert a nurse if respondents answer yes.                                                                                                                  | No change in IV antibiotic use. Number of courses of oral antibiotics increased and the median (IQR) time to detection of exacerbation requiring oral or IV antibiotics was shorter in the intervention group compared with the control group. No detectable change in lung function.                                                                                                                                                                                                                                                                                                   |
| 72 | Wood J, et al. High usability of a smartphone application for reporting symptoms in adults with cystic fibrosis. J Telemed Telecare. 2018;24(8):547-552.                                                                         | 2018 | Australia | Cystic fibrosis                | Not given                                               | Research           | Journal article | Delayed reporting of symptoms can result in more severe exacerbations and worse outcomes. |                                                                            | App             | Not reported | 12 questions re symptoms associated with exacerbation that alert a nurse if respondents answer yes.                                                                                                                  | Study looked at HCP response to the app questions using 45 clinical scenarios. Excellent usability and near-perfect agreement interpreting the app responses.                                                                                                                                                                                                                                                                                                                                                                                                                           |

# BMJ Open

## Needs of people with rare diseases that can be supported by electronic resources: a scoping review

|                                 |                                                                                                                                                                                                                                                                                                                                                                                                                                                                                                                                                                                                                                                                                                                                                                                                                                |
|---------------------------------|--------------------------------------------------------------------------------------------------------------------------------------------------------------------------------------------------------------------------------------------------------------------------------------------------------------------------------------------------------------------------------------------------------------------------------------------------------------------------------------------------------------------------------------------------------------------------------------------------------------------------------------------------------------------------------------------------------------------------------------------------------------------------------------------------------------------------------|
| Journal:                        | <i>BMJ Open</i>                                                                                                                                                                                                                                                                                                                                                                                                                                                                                                                                                                                                                                                                                                                                                                                                                |
| Manuscript ID                   | bmjopen-2021-060394.R1                                                                                                                                                                                                                                                                                                                                                                                                                                                                                                                                                                                                                                                                                                                                                                                                         |
| Article Type:                   | Original research                                                                                                                                                                                                                                                                                                                                                                                                                                                                                                                                                                                                                                                                                                                                                                                                              |
| Date Submitted by the Author:   | 10-Jun-2022                                                                                                                                                                                                                                                                                                                                                                                                                                                                                                                                                                                                                                                                                                                                                                                                                    |
| Complete List of Authors:       | Long, Janet; Macquarie University, Australian Institute of Health Innovation<br>Best, Stephanie; Macquarie University, Australian Institute of Health Innovation; Murdoch Childrens Research Institute, Australian Genomics<br>Nic Giolla Easpaig, Bróna; Macquarie University, Australian Institute of Health Innovation<br>Hatem, Sarah; Macquarie University, Australian Institute of Health Innovation<br>Fehlberg, Zoe; Macquarie University, Australian Institute of Health Innovation; Murdoch Children's Research Institute, Australian Genomics Health Alliance<br>Christodoulou, John; Murdoch Childrens Research Institute, Brain and Mitochondrial Research Group; The University of Melbourne, Department of Paediatrics<br>Braithwaite, Jeffrey; Macquarie University, Australian Institute of Health Innovation |
| <b>Primary Subject Heading</b>: | Health services research                                                                                                                                                                                                                                                                                                                                                                                                                                                                                                                                                                                                                                                                                                                                                                                                       |
| Secondary Subject Heading:      | Patient-centred medicine                                                                                                                                                                                                                                                                                                                                                                                                                                                                                                                                                                                                                                                                                                                                                                                                       |
| Keywords:                       | Quality in health care < HEALTH SERVICES ADMINISTRATION & MANAGEMENT, Organisation of health services < HEALTH SERVICES ADMINISTRATION & MANAGEMENT, Health & safety < HEALTH SERVICES ADMINISTRATION & MANAGEMENT                                                                                                                                                                                                                                                                                                                                                                                                                                                                                                                                                                                                             |
|                                 |                                                                                                                                                                                                                                                                                                                                                                                                                                                                                                                                                                                                                                                                                                                                                                                                                                |

SCHOLARONE™  
Manuscripts



I, the Submitting Author has the right to grant and does grant on behalf of all authors of the Work (as defined in the below author licence), an exclusive licence and/or a non-exclusive licence for contributions from authors who are: i) UK Crown employees; ii) where BMJ has agreed a CC-BY licence shall apply, and/or iii) in accordance with the terms applicable for US Federal Government officers or employees acting as part of their official duties; on a worldwide, perpetual, irrevocable, royalty-free basis to BMJ Publishing Group Ltd ("BMJ") its licensees and where the relevant Journal is co-owned by BMJ to the co-owners of the Journal, to publish the Work in this journal and any other BMJ products and to exploit all rights, as set out in our [licence](#).

The Submitting Author accepts and understands that any supply made under these terms is made by BMJ to the Submitting Author unless you are acting as an employee on behalf of your employer or a postgraduate student of an affiliated institution which is paying any applicable article publishing charge ("APC") for Open Access articles. Where the Submitting Author wishes to make the Work available on an Open Access basis (and intends to pay the relevant APC), the terms of reuse of such Open Access shall be governed by a Creative Commons licence – details of these licences and which [Creative Commons](#) licence will apply to this Work are set out in our licence referred to above.

Other than as permitted in any relevant BMJ Author's Self Archiving Policies, I confirm this Work has not been accepted for publication elsewhere, is not being considered for publication elsewhere and does not duplicate material already published. I confirm all authors consent to publication of this Work and authorise the granting of this licence.

1  
2  
3  
4  
5 1 Needs of people with rare diseases that can be supported by  
6  
7  
8  
9 2 electronic resources: a scoping review  
10  
11  
12  
13  
14 3

15  
16 4 Janet C Long\*<sup>1</sup>

17  
18  
19 5 Stephanie Best<sup>1,2</sup>

20  
21  
22 6 Brona Nic Giolla Easpaig<sup>1</sup>

23  
24  
25 7 Sarah Hatem<sup>1</sup>

26  
27  
28 8 Zoe Fehlberg<sup>1,2</sup>

29  
30  
31 9 John Christodoulou<sup>3</sup>

32  
33  
34 10 Jeffrey Braithwaite<sup>1</sup>

35  
36  
37 11 <sup>1</sup> Australian Institute of Health Innovation, Macquarie University, Australia

38  
39  
40 12 <sup>2</sup> Australian Genomics Health Alliance, Murdoch Children's Research Institute, Melbourne, Australia.

41  
42  
43 13 <sup>3</sup> Department of Paediatrics, Murdoch Children's Research Institute, University of Melbourne,  
44 Melbourne, Australia

45  
46  
47 15 \*Corresponding author

48  
49  
50 16 [Janet.long@mq.edu.au](mailto:Janet.long@mq.edu.au)

51  
52  
53 17  
54  
55  
56  
57  
58  
59  
60

## 18 Abstract

### 19 Objectives:

20 Rare diseases are characterised by low incidence, often with little evidence for effective treatments.  
21 Isolated patients and specialist centres for rare diseases are increasingly connected thanks to the  
22 internet. This scoping review aimed to identify issues facing people with a rare disease that authors  
23 report may be addressed by electronic resources (mobile applications, websites, social media  
24 platforms, telehealth and online portals).

### 25 Design:

26 Scoping review guided by the PRISMA-ScR guidelines.

### 27 Data sources:

28 Medline, Embase and PsycInfo were searched, supplemented by hand searches of selected journals,  
29 in July 2021.

### 30 Eligibility Criteria:

31 Peer-reviewed literature in English was searched using terms for rare disease (incidence <1:2,000),  
32 electronic modalities (e.g., mobile phone) and patient support terms. No date limit was set.  
33 Conference abstracts were included.

### 34 Data extraction and synthesis:

35 Data extracted: rare disease/group of diseases, name of the e-resource, need identified in the  
36 patient cohort, features of the e-resource, any other findings or observations of interest. From this, a  
37 framework was developed synthesising features across diseases and resources.

### 38 Results:

39 Seventy-two papers were found (from 383). Fifty-six electronic resources were described in 64  
40 papers, while 12 papers were exploratory studies. Cystic fibrosis (n=28) was most frequently  
41 addressed, followed by haemophilia (n=16).

1  
2  
3 42 Four domains and 23 subdomains of needs were extracted from the papers. The domains of needs  
4  
5 43 were: support for self-management, access to high-quality information, access to appropriate  
6  
7 44 specialist services, and social support. Subdomains sometimes related to needs of individual rare  
8  
9 45 diseases (e.g., social isolation due to infection risk in people with cystic fibrosis). Fifteen electronic  
10  
11 46 resources were identified that supported parents of children with rare disorders.  
12  
13  
14

## 15 47 Conclusions:

16 48 While it can be argued that rare diseases per se may be no less distressing or onerous to care for  
17  
18 49 than a high prevalence disease, rare diseases have unique features: the lengthy odyssey to find a  
19  
20 50 diagnosis, then appropriate specialists, the lack of evidence around effective treatments, guidelines,  
21  
22 51 or access to knowledgeable general health service providers. Designers of electronic resources are  
23  
24 52 urged to consult key stakeholders to enhance the effectiveness and usability of resources for people  
25  
26 53 with a rare disease.  
27  
28  
29  
30  
31  
32  
33

## 34 55 Article summary

### 36 56 Strengths and limitations of this study

- 37  
38  
39  
40  
41 57
- 42 • Individual named rare diseases/groups of diseases were included in the search terms to  
43 overcome deficiencies of searching only using “rare diseases,” but could not cover all rare  
44 58 diseases.  
45  
46 59
  - 47 • There are estimated to be 7-8,000 rare diseases so searching by name (plus their synonyms)  
48 60 was not feasible.  
49  
50 61
  - 51 • Data extraction considered the type of electronic resource proposed, by disease and by need  
52 62 the resource addressed.  
53  
54 63  
55  
56  
57  
58  
59  
60

1  
2  
3  
4  
5  
6  
7  
8  
9  
10  
11  
12  
13  
14  
15  
16  
17  
18  
19  
20  
21  
22  
23  
24  
25  
26  
27  
28  
29  
30  
31  
32  
33  
34  
35  
36  
37  
38  
39  
40  
41  
42  
43  
44  
45  
46  
47  
48  
49  
50  
51  
52  
53  
54  
55  
56  
57  
58  
59  
60

- 64 • Electronic resources were categorised into mobile applications, social support platforms,  
65 telehealth tools and online portals, and active (containing interactive content e.g., quizzes)  
66 and passive websites (information only).

67 **Key words**

68 Rare disease, patient resources, patient empowerment, e-health, mobile apps

69

For peer review only



## 70 Introduction

71 There are an estimated 6-7,000 different types of rare disease, many of them genetic.(1) We define  
72 a rare disease as a condition that has an incidence of less than 1 per 2,000 live births in the  
73 population.(1) Examples of rare diseases are Fragile X syndrome, haemophilia A, osteogenesis  
74 imperfecta, cystic fibrosis, spinal muscular atrophy type 1, and neurofibromatosis type 2. The low  
75 incidence of rare diseases mean that specifics of individual diseases are not covered in medical  
76 education programs which must prioritise more common conditions, and also that many health  
77 professionals will have never seen a case before.(2) Rare diseases are often difficult to diagnose,  
78 leading to the often described “diagnostic odyssey.”(3) The case has been made that even after this  
79 odyssey is concluded with a definitive diagnosis, the journey continues as people with a rare disease  
80 seek to access the best management care.(4)

81 Less than 5% of the estimated 7,000 rare diseases currently have an effective treatment.(1) The low  
82 numbers of cases of each rare disease means that evidence is often lacking to guide best practice.  
83 For example, CLN12 disease with an incidence of only 1 per million has too few people with the  
84 disease to set up a clinical trial to test the effectiveness of potential treatments or even map the  
85 “typical” progression of the disease.(5) Guidance on best practice must be determined through  
86 consensus recommendations of specialists in the condition(6, 7), which are often enhanced by the  
87 input of consumers who are living with the condition.(8)

88 A number of studies have explored the specific needs of people with a rare condition.(e.g., 9, 10, 11)  
89 Access to appropriate specialist services, finding a generalist health provider who is willing to learn  
90 about the condition, living with uncertainty of what is best practice and the trial and error nature of  
91 discovering it have all been reported.(e.g., 4)

92 Electronic resources, by which we mean mobile applications, websites, virtual monitoring devices,  
93 social media platforms, telehealth capability and online portals, hold promise of greater connectivity  
94 and collaboration in the field of rare diseases. Electronic resources are already being used to

1  
2  
3 95 improve understandings of rare diseases as national and international online registries, (e.g., 12, 13)  
4  
5 96 and virtual research consortiums (14, 15) pool their data and consolidate findings.  
6  
7

8 97 Electronic resources have a key role for people living with a rare disease. It is recognised that a  
9  
10 98 useful lever to accessing the best management care for people with a rare disease is empowerment,  
11  
12 99 in which people become knowledgeable about their illness and feel able to advocate for their  
13  
14 100 care.(16) Tools to foster empowerment are particularly relevant in this group and electronic  
15  
16 101 resources hold great promise to make information and resources more easily accessible. To our  
17  
18 102 knowledge no one has surveyed this fragmented field to determine the role of electronic resources  
19  
20 103 for people with a rare disease.  
21  
22  
23

24 104 This paper aims to systematically scope the peer-reviewed literature to: (i) identify issues facing  
25  
26 105 people with a rare disease that authors report may be addressed by electronic resources, and (ii)  
27  
28 106 collate evidence around features of effective and user-friendly e-resources.  
29  
30  
31

## 32 107 **Methods**

33 108 We systematically searched for peer-reviewed literature on consumer-facing electronic resources for  
34  
35 109 people with a rare disease, guided by the Preferred Reporting Items for Systematic Reviews and  
36  
37 110 Meta-Analyses extension for Scoping Reviews (17) (see supplementary file 1 for the completed  
38  
39 111 PRISMA-ScR checklist). The search was supplemented with a hand search of relevant peer-reviewed  
40  
41 112 journals. Patients and public were not directly involved in the design, reporting or dissemination  
42  
43 113 plan of this paper.  
44  
45  
46  
47

48 114 Three databases, Medline, Embase and PsycInfo were searched in July 2021. No date limits were set  
49  
50 115 but we only included articles in the English language. We targeted empirical peer-reviewed full  
51  
52 116 articles but initial exploratory searches showed that a large proportion of the retrieved items were  
53  
54 117 conference presentations on resources not reported elsewhere. These were therefore also included  
55  
56 118 in the review. Search terms were developed through exploration of Medical Subject Heading terms,  
57  
58 119 and key words from equivalent papers from other fields. Search strings combined terms for rare  
59  
60

1  
2  
3 120 disease, (including specific named rare disease conditions to maximise results), with patient and  
4  
5 121 carer facing resources (e.g., health resources, patient participation), and terms associated with  
6  
7 122 electronic resources (e.g., mobile applications, cell phone, e-health). In addition, a hand search was  
8  
9 123 performed in *Orphanet Journal of Rare Diseases* (searching for patient focused electronic resources)  
10  
11 124 and *Journal of Medical Internet Research* (searching for applications for rare diseases). Search strings  
12  
13  
14 125 are shown in supplementary file 2.

16  
17 126 The definition of a rare disease as having an incidence of less than 1:2,000 was used as a guide only  
18  
19 127 as the grouping together of related rare diseases muddied the waters on exact rates, as did the  
20  
21 128 range of definitions employed when reporting on rare diseases. The search therefore drew on  
22  
23 129 named rare conditions/groups of conditions the most common types of rare diseases (based on  
24  
25 130 research effort for therapeutic companies around the world.(18) Imperfect as that list is, it retrieved  
26  
27 131 many more useful articles than the generic rare disease terms. "Mitochondrial respiratory chain  
28  
29 132 disorders" was also added as a large group of rare diseases that are not amenable to pharmaceutical  
30  
31 133 treatment. The condition groups searched for by name therefore were narcolepsy, primary biliary  
32  
33 134 cholangitis, Fabry disease, cystic fibrosis, haemophilia, spinal muscular atrophy, retinal dystrophy, X-  
34  
35 135 linked hypophosphatemia, urea cycle disorders, pulmonary arterial hypotension, cerebral  
36  
37 136 adrenoleukodystrophy, hereditary angioedema, AA amyloidosis, Cushing's syndrome, and  
38  
39 137 mitochondrial respiratory chain disorders.

40  
41  
42 138 The following inclusion criteria needed to be met for a paper to be included: (a) the paper was  
43  
44 139 framed around the needs of people diagnosed with a rare disease or group of rare diseases (defined  
45  
46 140 as incidence <1:2,000 (1)); (b) the focus was on how an electronic resource could meet that need in  
47  
48 141 some way (c) either proposed and described a particular electronic resource, or reported on the  
49  
50 142 development, testing or evaluation of an actual electronic resource. Exclusion criteria were: (i) not  
51  
52 143 about a rare disease or group of rare diseases; (ii) electronic resources were not consumer-facing  
53  
54 144 (e.g., virtual monitoring where the consumer has a passive role and no access to the data,  
55  
56  
57  
58  
59  
60

1  
2  
3 145 applications that consumers used altruistically to collect data for researchers; electronic tools for  
4  
5 146 health care professionals only).

7  
8 147 Search results were downloaded into reference management software EndNote X9 and two  
9  
10 148 researchers (JL and SB) independently screened 50% of titles and abstracts using the eligibility  
11  
12 149 criteria. Disagreements were discussed until consensus was met. Remaining articles were screened  
13  
14 150 by JL. Included articles were read in full and eligibility criteria again applied (by JL and validated by  
15  
16 151 SB). Data was extracted from the final set: rare disease/group of diseases, name of the e-resource,  
17  
18 152 need identified in the patient cohort, features of the e-resource, any other findings or observations  
19  
20 153 of interest.

21  
22  
23  
24 154 The final step was collating and synthesising the needs of people with a rare disease discussed in the  
25  
26 155 articles, looking for similarities and differences across different rare diseases, and the electronic  
27  
28 156 solutions proposed for each. From this, a framework was developed describing the synthesised  
29  
30 157 domains of needs and examples of electronic resources designed to meet the need.

## 31 32 33 34 158 **Results**

35  
36  
37  
38 159 The search resulted in 383 papers. Title and abstract screening removed 223 papers and full text  
39  
40 160 screening, another 33. This left 72 papers for data extraction and analysis. Figure 1 shows the  
41  
42 161 PRISMA flow chart for the search.

43  
44  
45 162 Studies were set in 16 different countries including seven papers that included all of Europe. United  
46  
47 163 States of America (n=14), the United Kingdom (n=11), and Canada (n=10) were the best represented  
48  
49 164 countries. Figure 2 shows frequencies of all countries. Twenty-one different rare diseases were  
50  
51 165 represented mostly in single papers, while 8 papers focused on rare diseases generally (n=8). The  
52  
53 166 most common rare disease reported was cystic fibrosis (n=28) followed by haemophilia (n=19). Table  
54  
55 167 1 gives details.

56  
57  
58  
59 168  
60

169 <<Figure 1: PRISMA flowchart for the search. (JMIR = *Journal of Medical Internet Research*; OJRD =  
 170 *Orphanet Journal of Rare Diseases*)>>

171 <<Figure 2: Countries in which included studies were undertaken (frequency of papers).>>

172 Table 1: Overview of included papers. (\* refers to papers focussed on women with non sex-specific  
 173 Mendelian rare bleeding disorders)

| Rare disease / group of diseases                            | Number of papers |
|-------------------------------------------------------------|------------------|
| Acute Intermittent Porphyria (AIP)                          | 1                |
| Addison's disease                                           | 3                |
| Autoimmune liver diseases                                   | 1                |
| Bleeding disorders in women*                                | 1                |
| Complex regional pain syndrome                              | 1                |
| Congenital hypogonadotropic hypogonadism, Kallmann syndrome | 1                |
| Cystic fibrosis                                             | 28               |
| Genetic eye disorders                                       | 1                |
| Haemophilia                                                 | 19               |
| Hirschsprung's Disease                                      | 1                |
| Idiopathic subglottic stenosis                              | 1                |
| Inborn errors of metabolism                                 | 1                |
| Lymphangiomyomatosis                                        | 1                |
| Narcolepsy                                                  | 2                |
| Osteogenesis Imperfecta                                     | 1                |
| Phenylketonuria, maple syrup urine disease or tyrosinemia   | 1                |
| Rare and Congenital Anaemias                                | 1                |
| Rare diseases                                               | 6                |
| Rare Multisystemic Vascular Diseases                        | 1                |
| Thoracic Outlet Syndrome                                    | 1                |

174

175 Most papers reported on e-resources that were being trialled or were under development (n=56 e-  
 176 resources from 64 papers), while 12 were framed as scoping exercises or explored usability of  
 177 existing websites. For example, Nicholl and colleagues (19) explored the needs of people with rare

1  
2  
3 178 diseases that could be met by a consumer facing website, Ruther and colleagues (20) researched  
4  
5 179 what people with rare liver disorders need in an app, and Aizawa and colleagues (21) critiqued  
6  
7 180 information available on the internet for people with narcolepsy.  
8  
9  
10 181 E-resources fell into five broad categories: (i) mobile applications (apps) for cell phones or tablets  
11  
12 182 (n=22), (ii) social networking platforms (n=14), (iii) telehealth and virtual care platforms (n=13), (iv)  
13  
14 183 websites (interactive content e.g., education modules with quizzes) (n=15), and (v) websites (passive  
15  
16 184 content e.g., information) (n=7). Some e-resources fit into more than one category (e.g., WhatsApp  
17  
18 185 platform for parents of newly diagnosed infants with haemophilia provided social support from  
19  
20 186 other parents as well as virtual consults with specialists.(22) In these cases, the main function  
21  
22 187 decided the category. Table 2 lists the types of resources, their features and their benefits.  
23  
24  
25  
26

| Type of e-resource                    | Features and benefits                                                                                                                                                                                                                                                                                                          |
|---------------------------------------|--------------------------------------------------------------------------------------------------------------------------------------------------------------------------------------------------------------------------------------------------------------------------------------------------------------------------------|
| Mobile applications (apps)            | Apps for phones and tablets can provide portable, always available and easily accessed information, data entry (e.g., symptom trackers, guidelines, calculators), and links to other resources.                                                                                                                                |
| Social networking platforms           | Facilitating contact /emotional support between isolated people with the same rare disease; access to advice for day to day management queries                                                                                                                                                                                 |
| Telehealth and virtual care platforms | Rare disease specialists are also rare, often involving long journeys to see them face to face. Telehealth consults allow easier access. Virtual care, where patient uploaded data can be shared with a health professional also overcomes the burden of travel and facilitates access to care from an appropriate specialist. |
| Websites (interactive)                | Websites with interactive components allow the patient to enter their data and tailor content. Patient education through quizzes and games especially useful for younger people.                                                                                                                                               |
| Websites (passive)                    | High quality information can be made easily accessible on a website                                                                                                                                                                                                                                                            |

188

1  
2  
3 189 Synthesised themes from the data extraction led to the identification of four domains and 23 sub-  
4  
5 190 domains of needs of people with a rare disease or parents of children with a rare disease. A range of  
6  
7 191 unique needs arising from features of individual diseases were identified (e.g., risk of life-threatening  
8  
9 192 acute episodes in Addison's Disease in a context of few emergency health professionals being  
10  
11 193 knowledgeable or confident to deal with adrenal crisis (23)), as well as more global needs that were  
12  
13 194 common across all presentations (e.g., the scarcity of high quality, relevant information about  
14  
15 195 individual rare diseases). (19-21, 23-51)  
16  
17  
18  
19 196 Needs are summarised in Table 3 giving examples of disease specific needs in each sub-domain, and  
20  
21 197 examples of the e-resources that had been developed or proposed to address those needs. Data  
22  
23 198 extracted from the final set of items is given in full in supplementary file 3.  
24  
25  
26  
27  
28  
29  
30  
31  
32  
33  
34  
35  
36  
37  
38  
39  
40  
41  
42  
43  
44  
45  
46  
47  
48  
49  
50  
51  
52  
53  
54  
55  
56  
57  
58  
59  
60

| Domain                                                              | Sub-domains with disease-specific examples                                                                                                                                                                 | e-resource examples                                                                                                                                                                                                                               |
|---------------------------------------------------------------------|------------------------------------------------------------------------------------------------------------------------------------------------------------------------------------------------------------|---------------------------------------------------------------------------------------------------------------------------------------------------------------------------------------------------------------------------------------------------|
| Chronic diseases requiring self-management                          | Complicated self-management (e.g., monitoring for bleeds and factor usage for haemophilia <b>(35, 52)</b> )                                                                                                | Online tool (Metabolic DietAppSuite) for smartphones/desktops for 15 different Inborn Errors of Metabolism. Creates a personalised dashboard including specific nutrient goals. Food diary, nutrient counts <b>(53)</b>                           |
|                                                                     | Some treatment regimes require detailed record keeping to optimise outcomes (e.g., treatment of infections in CF <b>(33, 51, 54, 55)</b> )                                                                 | MyCBDR (linked to Canadian Bleeding Disorder Registry (CBDR) is an app that allows people with a bleeding disorder to track infusions and add symptoms. Data can be shared with all Haemophilia Treatment Centres in Canada <b>(35)</b>           |
|                                                                     | Transition to self-care as adolescents become adults (e.g., teens with severe haemophilia <b>(29, 56-58)</b> )                                                                                             | Smartphone app (Faccio Centro) aimed at adolescents with CF that lists daily therapy, with instructions on order, progress tracking, alerts for when to start and when checks are needed. Also can email questions to healthcare team <b>(59)</b> |
|                                                                     | Exercise programs need to be tailored to the rare disease (e.g., reduced lung function and exercise tolerance in people with CF <b>(60-62)</b> )                                                           | LAM App on smartphone with interfacing wearable devices for women with Lymphangioliomyomatosis (LAM). Tailored exercise program and physio check in <b>(63)</b>                                                                                   |
|                                                                     | Monitoring changes in symptoms and treatments (e.g., recognising bleeds in mild haemophilia <b>(64, 65)</b> )                                                                                              | MyCyFAPP calculates Pancreatic enzyme replacement therapy-doses for fat digestion, a symptoms diary, educational material, and linked to a web tool allowing health professionals to view data and give feedback <b>(28, 30, 66)</b>              |
|                                                                     | Burden of hospital attendance (e.g., living far away from only specialist centre for narcolepsy <b>(67)</b> ; rare diseases with high disease burden (e.g., CF <b>(68)</b> )                               | An ultrasound diagnostic solution for children with haemophilia, the EMO.TI.ON. System used at home by parents or caregivers to diagnose suspected bleeds. System can transfer live images to specialist physician <b>(69)</b>                    |
|                                                                     | Depression, anxiety, distress affect adherence to treatment regimes, which in turn affect health and quality of life (e.g., distress of parents of newly diagnosed children with haemophilia <b>(27)</b> ) | Internet delivered cognitive behavioural therapy sessions, eHealth CF-CBT guided by a qualified therapist for people with cystic fibrosis experiencing depression or anxiety <b>(70)</b>                                                          |
| Lack of high-quality information on all aspects of the rare disease | Information that is readable, accessible and from a credible source (e.g., lack of specific information on rare and congenital anaemias <b>(71)</b> )                                                      | Newborn Screening Connect (NBS Connect) provides high quality information for parents of children diagnosed with a disorder included in the newborn screening panel performed routinely in USA <b>(43)</b>                                        |
|                                                                     | Information available in your language, appropriate for your culture (e.g., Canadian haemophilia resources in English and French <b>(56, 64)</b> )                                                         | Online education package for congenital hypogonadotropic hypogonadism and the olfacto-genital syndrome is available in 20 European languages. Readability score meets recommended level <b>(26)</b>                                               |
|                                                                     | Appropriate to age group, or special needs (e.g., information for teens with CF <b>(72)</b> )                                                                                                              | Gene.vision website on genetic eye disorders optimised for people with impaired vision <b>(40)</b>                                                                                                                                                |
|                                                                     | Access to relevant clinical trials, or new research findings may be difficult to find <b>(45)</b>                                                                                                          | NIH Rare Diseases Clinical Research Network (RDCRN) notifies registrants with a range of rare disorders of relevant studies <b>(45)</b>                                                                                                           |



|                                                                     |                                                                                                                                                                                                               |                                                                                                                                                                                                                                              |
|---------------------------------------------------------------------|---------------------------------------------------------------------------------------------------------------------------------------------------------------------------------------------------------------|----------------------------------------------------------------------------------------------------------------------------------------------------------------------------------------------------------------------------------------------|
|                                                                     | Disease specific information on niche topics like family planning (e.g., for genetic disorders such as CF <b>(32)</b> )                                                                                       | Facebook group (MyGirlsBlood) for women with bleeding disorders where women can ask questions or share experiences especially around menstruation <b>(34)</b>                                                                                |
|                                                                     | Urgent need for disease specific information during COVID-19 pandemic <b>(46)</b>                                                                                                                             | Weekly webcasts on COVID for people with CF with questions through Google forms. Email notifications of webcasts sent to known patients in USA <b>(46)</b>                                                                                   |
| Specialist centres may be geographically dispersed and hard to find | Identifying appropriate care for rare disease (e.g., nearest specialist; appropriately trained allied health professionals (e.g., physios who know risks of exercise with haemophilia <b>(73)</b> )           | Mobile app developed by VASCERN (European Reference Network on Rare Multisystemic Vascular diseases) contains an easily searchable Directory to find closest expert and to find appropriate patient advocacy group within Europe <b>(44)</b> |
|                                                                     | Burden of hospital attendance (e.g., living far away from only specialist centre; rare diseases with high disease burden (e.g., severe haemophilia <b>(74)</b> )                                              | Virtual Reality Visual Feedback Module for people with complex regional pain syndrome (who have few treatment options and for whom travel is onerous). After initial in-person training and assessment, can be continued at home <b>(75)</b> |
|                                                                     | Knowledgeable emergency care for acute events may be hard to find (e.g., for infants with newly diagnosed haemophilia <b>(27)</b> )                                                                           | Quick response (QR coded) bracelet has a scannable QR code that links to emergency management information for people in adrenal crisis <b>(23)</b>                                                                                           |
|                                                                     | Information on daily management may be lacking for both the person with the rare disease and the health professionals supporting them (e.g., for parents of infants with Hirschsprung's Disease <b>(50)</b> ) | Thoracic Outlet Syndrome (TOS) Awareness Facebook group for both people with TOS and health professionals. Most posts encouraging and giving sound advice <b>(49)</b>                                                                        |
| Social isolation from peers and advice networks                     | Unable to connect with people with the same disorder (e.g., being the only parent you know with a child with a rare disorder <b>(25)</b> )                                                                    | Online forum for people with Addison's Disease or Cushing's syndrome, moderated by the Dutch Adrenal Society <b>(37)</b>                                                                                                                     |
|                                                                     | Disorders that require isolation for infection control, or safety are isolated from unaffected peers as well (e.g., fracture risk for children with OI in new surroundings <b>(31)</b> )                      | Online conferences (BreatheCon) for people with cystic fibrosis who must isolate for infection control <b>(32)</b>                                                                                                                           |
|                                                                     | Emotional support needed for distressed parents (e.g., for parents of children with OI <b>(31)</b> )                                                                                                          | Skype support groups for women with acute intermittent porphyria mediated by a porphyria experts <b>(76)</b>                                                                                                                                 |
|                                                                     | Support for daily management issues (e.g., online for people with idiopathic subglottic stenosis <b>(36)</b> )                                                                                                | Social media campaign around living with Hirschsprung's Disease: Shit happens on Facebook, Twitter, Blog posts <b>(50)</b>                                                                                                                   |
|                                                                     | Information and peer knowledge sharing for adolescents transitioning to full self-management (e.g., for teens with CF <b>(72)</b> )                                                                           | hiFive - small online group for 11-19 year-olds living with severe haemophilia. Closed to parents. Trying to harness peer to peer transmission of self-management skills <b>(57)</b>                                                         |
|                                                                     | Social support associated with better mental health / health outcomes (e.g., parents of newly diagnosed infants with Phenylketonuria <b>(43)</b> )                                                            | Online peer support program (CFOne) for adolescents and young adults with CF <b>(77)</b>                                                                                                                                                     |

1  
2  
3  
4  
5  
6  
7  
8  
9  
10  
11  
12  
13  
14  
15  
16  
17  
18  
19  
20  
21  
22  
23  
24  
25  
26  
27  
28  
29  
30  
31  
32  
33  
34  
35  
36  
37  
38  
39  
40  
41  
42  
43  
44  
45  
46

199 **Table 3:** Domains and sub-domains of needs of people with a rare disease that can be solved or supported by a consumer-facing electronic resource. (CF =  
200 cystic fibrosis, OI = osteogenesis imperfecta)

For peer review only

## 201 Chronic diseases requiring complicated self-management

202 Many rare diseases were described as having a high disease burden relying on complicated self-  
203 management regimes. The association of adherence to specific treatments with better health  
204 outcomes is strongly supported by evidence for cystic fibrosis (78), metabolic diseases requiring  
205 medical diets (79), and haemophilia (80), providing a clear rationale for supporting self-  
206 management. Optimal self-management in many cases required careful record-keeping of  
207 symptoms and tracking of treatments. Mobile apps were often designed to assist with this need.  
208 Symptom trackers were a common feature with or without medication alerts or treatment  
209 information (pancreatic enzyme replacement therapy for people with cystic fibrosis (28, 66)). Some  
210 had a function that allowed sharing of patient entered data with their health care team (e.g., 54, 81).  
211 Others tracked dietary intake for those on a medical diet (e.g., 53).

## 212 Lack of high-quality information

213 A common problem across all the rare diseases represented in this review was access to high-  
214 quality, culturally and demographically appropriate information from a credible source that was easy  
215 to find and understand. Information sought could be around the nature of the disease, medical  
216 treatments, prognoses, etc. for the person with the disease and sometimes also for the health  
217 professionals supporting them (e.g., 23, 26, 49). Links to registries and research consortiums helped  
218 people stay up to date with treatment options (e.g., 45). Information about day-to-day management  
219 issues was often sought from social networks of people with experience of the same disease rather  
220 than specialist health professionals (e.g., 34, 37, 38). One paper critiqued existing online information  
221 on the rare disorder narcolepsy, following a study that showed access to high quality web-based  
222 information could reduce time to diagnosis through better understanding of signs and symptoms  
223 (21). Some informational needs related to “niche” topics, e.g., an app for the subset of people with  
224 mild haemophilia to help them assess for cryptic bleeds after injury (64).

## 225 Specialist centres for rare diseases may be geographically dispersed

226 Another common problem was the small number of rare disease specialist centres that could be  
227 widely dispersed geographically. Some e-resources provided directories for the nearest specialist  
228 centre (40, 48), or nearest, appropriately skilled allied health provider or patient advocacy agency  
229 (71). Others provided virtual consultations (e.g., 82) or tailored exercise (e.g., 60) or mental health  
230 services (70) via telehealth.

## 231 Social isolation from peers and advice networks

232 The social isolation that comes from having a rare disease is often discussed as a need unique to  
233 people with a rare disease. Khair and colleagues (83) note that for many adolescent boys with  
234 haemophilia, the only person other than their doctor who knows about their disease is their parent.  
235 Limited access to specialist services means people or parents of a child with a rare condition have to  
236 face non-urgent day-to-day issues by themselves unless they find appropriate social support. Social  
237 support could be with people with the same disease (e.g., Facebook / Twitter group for  
238 Hirschsprung's disease (50)) or include health professionals (e.g., online support group for thoracic  
239 outlet syndrome (49)).

## 240 Discussion

241 This review found 72 papers outlining the needs of people with a rare disease, or their carers that  
242 could be addressed by an e-resource. Four domains and 23 subdomains of needs were identified and  
243 e-resources to address or support those needs were broadly categorised into five groups: mobile  
244 apps, social support platforms, telehealth and virtual health tools, and active and passive websites.  
245 A range of unique needs arising from features of individual diseases were identified. Examples  
246 included the burden of constant physical isolation to prevent infection for people with cystic fibrosis  
247 (32), the acute distress of parents of infants with osteogenesis imperfecta at suspicions of child

1  
2  
3 248 abuse that often preceded diagnosis (31), and the difficulty of recognising signs of an impending  
4  
5 249 adrenal crisis for people with Addison's Disease that can be life threatening.(23, 37) While the  
6  
7 250 burden of disease for rare disorders may be similar to higher incidence conditions such as stroke or  
8  
9  
10 251 breast cancer, the added burden of the lack of a solid evidence base of effective treatments, best  
11  
12 252 practice guidelines and competent and knowledgeable health service providers is not. The well  
13  
14 253 documented diagnostic odyssey for people with rare diseases (3) and laments that health  
15  
16 254 professionals had never heard of their disease (4) is a burden unique to this group.  
17  
18  
19 255 This burden of uniqueness spills over to other needs. Exercise is crucial for physical and mental  
20  
21 256 wellbeing but for many people with a rare disease, any exercise program must be tailored and  
22  
23 257 supervised by a suitably knowledgeable health professional. Reduced exercise tolerance for people  
24  
25 258 with cystic fibrosis and LAM, and risk of bleeds into their joints for people with haemophilia were  
26  
27 259 addressed by telehealth or online modules.(60, 63, 81, 84-86) Social support of group exercise  
28  
29 260 classes is known to be motivating but is not possible for people with cystic fibrosis who are at risk of  
30  
31 261 cross infection. Online solutions went some way to solving this need (e.g., 85).  
32  
33  
34  
35 262 Resources supporting peer to peer support for people and carers of children with a rare disease  
36  
37 263 were well represented in the articles. The value of social support from someone who is on the same  
38  
39 264 journey is well documented. (e.g., 87)) Although the quality of the advice and information  
40  
41 265 exchanged on social support platforms is often criticised,(88) there was no evidence of this in our  
42  
43 266 sample, with some sites convened or facilitated by a trained health professional. Four studies  
44  
45 267 critiqued the content of posts on social support platforms for people with different rare diseases and  
46  
47 268 found them to be overwhelmingly positive and supportive.(36, 37, 49, 50) Real-time, knowledgeable  
48  
49 269 solutions to problems, plus emotional support were demonstrated as highly valuable to members  
50  
51 270 and these benefits were noted as important goals for any proposed new e-resources.(20, 31)  
52  
53  
54  
55 271 It has been argued that an often overlooked need for people with a rare disease is support for their  
56  
57 272 parents or carers, on whom the burden of management often falls.(89) This review identified 15 e-  
58  
59  
60

1  
2  
3 273 resources that supported carers (mostly parents). The distress that parents feel on diagnosis of a  
4  
5 274 child with a rare disease was frequently discussed and provided the rationale for social support  
6  
7 275 platforms and messaging apps, management support apps, and telehealth tools. One German study  
8  
9 276 provided parents of children with cystic fibrosis online writing-based therapy to alleviate  
10  
11  
12 277 psychological distress and anxiety.(90)

13  
14  
15 278 Readability of information found on the internet has been widely critiqued and criticised. A typical  
16  
17 279 example is a review of online education resources from government and health care organisations  
18  
19 280 on multiple sclerosis and rheumatoid arthritis (neither considered rare diseases) were found to be  
20  
21 281 written at 11<sup>th</sup> or 12<sup>th</sup> grade standard, whereas the average American reads at a 5<sup>th</sup> grade  
22  
23 282 standard.(91) The authors state material that is too complex limits its usefulness and increases  
24  
25 283 inequities. E-resources in this review were often noted to be co-designed by health professionals,  
26  
27 284 patient advocacy agencies, parents, and people with a rare disease as well as education experts to  
28  
29 285 mitigate this risk. (e.g., 26, 53) Usability and acceptability studies were reported for some but not all  
30  
31 286 the resources found in this review. Ensuring resources are easy to understand, appeal to the target  
32  
33 287 group's demographics (e.g., adolescents versus older adults), and suited to the skills of the users is  
34  
35 288 an obvious goal but one that this scoping review did not always find was done well. Patient advocacy  
36  
37 289 agencies are noted in the broader literature to be particularly proactive in ensuring acceptable and  
38  
39 290 easy to understand resources. A survey of patient advocacy groups for people with rare diseases,  
40  
41 291 found 100% of respondents would be interested in collaborating with relevant healthcare or  
42  
43 292 research groups to develop complementary resources suited to their members, and avoid wasted  
44  
45 293 effort involved in duplication.(89)

46  
47  
48 294 The very low incidence of rare diseases mean that patients and appropriate services are  
49  
50  
51 295 geographically widely distributed. Electronic resources such as telehealth, social networking  
52  
53 296 platforms and specialised apps are therefore ideal solutions to provide appropriate care. Progress in  
54  
55  
56 297 understanding diseases that are rare has been accelerated in recent years as clinicians and scientists  
57  
58  
59  
60

1  
2  
3 298 around the world pool the data they have on local. A similar benefit comes for patients as they find  
4  
5 299 or are linked to others with knowledge and experience of their unique situation. Currently, the  
6  
7 300 efficacy of e-resources for people with a rare disease is being realised one disease group at a time.  
8  
9 301 While each disease has its unique features, we have shown here that the needs of all people with  
10  
11 302 rare disease are basically the same. These domains of needs should be addressed by any team  
12  
13  
14 303 wishing to develop new e-resources for this cohort.  
15  
16

### 17 304 Strengths and limitations

18  
19  
20 305 The nature of the topic (e-resources) lent itself more to conference presentations rather than full  
21  
22 306 peer-reviewed articles. A strength of our search was that we included these items although a  
23  
24 307 weakness is that limited information was able to be extracted from some abstracts. Further there  
25  
26 308 was likely an element of publication bias where only successfully developed e-resources were  
27  
28 309 reported. The main limitation to our review was the difficulty capturing articles focussed on people  
29  
30 310 with a rare disease. Our search was systematic but does not claim to be exhaustive. In particular, the  
31  
32 311 search terms to capture rare diseases was problematic. Since there are over 7,000 rare diseases, it  
33  
34 312 was not feasible to search for each by name. Our strategy was therefore to search for a limited  
35  
36 313 number of named rare disease groups. The list of needs identified are characteristic of any rare  
37  
38 314 disease, and while some needs are unique to some specific disease manifestation, the majority were  
39  
40 315 applicable to all. This generalisability will be useful for anyone designing e-resources to support  
41  
42 316 people with a rare disease.  
43  
44  
45  
46  
47

### 48 317 Conclusion

49  
50  
51  
52 318 This review scoped the peer-reviewed literature to identify needs unique to people, or carers of  
53  
54 319 people with a rare disease. It identified four broad domains of need: (i) support for complicated self-  
55  
56 320 management regimes, (ii) access to high-quality, easy to understand information, (iii) access to  
57  
58 321 appropriate specialist services, and (iv) social support. Most studies involved needs of people or  
59  
60

1  
2  
3 322 carers of children with haemophilia or cystic fibrosis but also addressed another 20 named rare  
4  
5 323 diseases or rare disease groups (e.g., inborn errors of metabolism). While the physical burden of a  
6  
7 324 rare disease may be comparable to higher prevalence conditions such as stroke or cancer, rare  
8  
9 325 diseases have unique overlying issues: the lengthy odyssey to find a diagnosis, the quest to find  
10  
11 326 appropriate specialists to manage your care, the lack of a solid evidence base of effective treatments  
12  
13 327 or best practice guidelines, or access to competent and knowledgeable general health service  
14  
15 328 providers are unique to those with a rare disease. E-resources are well placed to address many of  
16  
17 329 these problems but must be carefully co-designed with key stakeholders lest their complexity,  
18  
19 330 narrow scope or cultural inappropriateness further disempower this already marginalised group.  
20  
21  
22  
23  
24 331  
25  
26  
27 332

## 332 Abbreviations

|     |             |                                             |
|-----|-------------|---------------------------------------------|
| 333 | AIP         | Acute intermittent porphyria                |
| 334 | CF          | cystic fibrosis                             |
| 335 | e-resource  | electronic resource                         |
| 336 | <i>JMIR</i> | <i>Journal of Medical Internet Research</i> |
| 337 | LAM         | Lymphangiomyomatosis                        |
| 338 | OI          | osteogenesis imperfecta                     |
| 339 | <i>OJRD</i> | <i>Orphanet Journal of Rare Diseases</i>    |

340  
51  
52  
53  
54  
55  
56  
57  
58  
59  
60



1  
2  
3  
4 341 **Declarations**

5  
6  
7 342 **Conflict of interest**

8  
9  
10 343 The authors have no conflicts of interest to declare.

11  
12  
13  
14 344 **Ethics**

15  
16  
17 345 No ethical approval was required as all data was publicly available.

18  
19  
20 346 **Patient consent for publication**

21  
22  
23 347 Not applicable

24  
25  
26 348 **Patient and Public Involvement**

27  
28  
29 349 No involvement

30  
31  
32 350

33  
34 351 **Data availability statement**

35  
36  
37 352 All data is provided in the paper, supplementary files or in the public domain.

38  
39  
40 353 **Funding**

41  
42  
43 354 This project was funded by a Mito Foundation Project Grant 2019-21.

44  
45  
46 355 **Acknowledgements**

47  
48  
49 356 The research conducted at the Murdoch Children's Research Institute was supported by the

50  
51  
52 357 Victorian Government's Operational Infrastructure Support Program. The Chair in Genomic Medicine

53  
54 358 awarded to JC is generously supported by The Royal Children's Hospital Foundation.

55  
56  
57  
58  
59  
60

## 359 Author contributions

360 JL, SB, SH and BNGE designed the study. JL and SB collected data and undertook the analysis. SH, ZF,  
361 BNGE, JC and JB critically reviewed and commented on the results. JL wrote the first draft of the  
362 paper which was reviewed by SB, SH, ZF, BNGE, JC and JB. All authors approved the final version.

## 363 Supplementary file 1: PRISMA-ScR Checklist

## 364 Supplementary file 2: Search strings

## 365 Supplementary file 3: Full data extraction sheet for included papers

366

## 367 References

- 368 1. Boycott KM, Vanstone MR, Bulman DE, MacKenzie AE. Rare-disease genetics in the era of  
369 next-generation sequencing: discovery to translation. *Nature Reviews Genetics*. 2013;14(10):681-91.
- 370 2. Ramalle-Gómara E, Domínguez-Garrido E, Gómez-Eguílaz M, Marzo-Sola ME, Ramón-  
371 Trapero JL, Gil-de-Gómez J. Education and information needs for physicians about rare diseases in  
372 Spain. *Orphanet J Rare Dis*. 2020;15(1):18.
- 373 3. Thevenon J, Duffourd Y, Masurel-Paulet A, Lefebvre M, Feillet F, El Chehadeh-Djebbar S, et  
374 al. Diagnostic odyssey in severe neurodevelopmental disorders: toward clinical whole-exome  
375 sequencing as a first-line diagnostic test. *Clin Genet*. 2016;89(6):700-7.
- 376 4. Long JC, Best S, Hatem S, Theodorou T, Catton T, Murray S, et al. The long and winding road:  
377 perspectives of people and parents of children with mitochondrial conditions negotiating  
378 management after diagnosis. *Orphanet J Rare Dis*. 2021;16(1):310.
- 379 5. Augustine EF, Adams HR, Mink JW. *Clinical Trials in Rare Disease: Challenges and*  
380 *Opportunities*. *J Child Neurol*. 2013;28(9):1142-50.
- 381 6. Parikh S, Goldstein A, Koenig MK, Scaglia F, Enns GM, Saneto R, et al. Diagnosis and  
382 management of mitochondrial disease: a consensus statement from the Mitochondrial Medicine  
383 Society. *Genet Med*. 2015;17(9):689-701.
- 384 7. Geberhiwot T, Moro A, Dardis A, Ramaswami U, Sirrs S, Marfa MP, et al. Consensus clinical  
385 management guidelines for Niemann-Pick disease type C. *Orphanet J Rare Dis*. 2018;13(1):50.
- 386 8. Kaufmann P, Pariser AR, Austin C. From scientific discovery to treatments for rare diseases –  
387 the view from the National Center for Advancing Translational Sciences – Office of Rare Diseases  
388 Research. *Orphanet J Rare Dis*. 2018;13(1):196.
- 389 9. Depping MK, Uhlenbusch N, von Kodolitsch Y, Klose HFE, Mautner VF, Löwe B. Supportive  
390 care needs of patients with rare chronic diseases: multi-method, cross-sectional study. *Orphanet J*  
391 *Rare Dis*. 2021;16(1):44.

- 1  
2  
3 392 10. Kreuter M, Bendstrup E, Russell AM, Bajwah S, Lindell K, Adir Y, et al. Palliative care in  
4 393 interstitial lung disease: living well. *Lancet Respir Med*. 2017;5(12):968-80.
- 5 394 11. Quinn L, Davis K, Yee A, Snyder H. Understanding genetic learning needs of people affected  
6 395 by rare disease. *J Genet Couns*. 2020;29(6):1050-8.
- 7 396 12. Rubio-Gozalbo ME, Haskovic M, Bosch AM, Burnyte B, Coelho AI, Cassiman D, et al. The  
8 397 natural history of classic galactosemia: lessons from the GalNet registry. *Orphanet J Rare Dis*.  
9 398 2019;14(1):86.
- 10 399 13. Scalco RS, Lucia A, Santalla A, Martinuzzi A, Vavla M, Reni G, et al. Data from the European  
11 400 registry for patients with McArdle disease and other muscle glycogenoses (EUROMAC). *Orphanet J*  
12 401 *Rare Dis*. 2020;15(1):330.
- 13 402 14. Woodward L, Johnson S, Walle JV, Beck J, Gasteyer C, Licht C, et al. An innovative and  
14 403 collaborative partnership between patients with rare disease and industry-supported registries: the  
15 404 Global aHUS Registry. *Orphanet J Rare Dis*. 2016;11(1):154.
- 16 405 15. Pavan S, Rommel K, Mateo Marquina ME, Höhn S, Lanneau V, Rath A. Clinical Practice  
17 406 Guidelines for Rare Diseases: The Orphanet Database. *PLoS One*. 2017;12(1):e0170365.
- 18 407 16. Le Cam Y, Bolz-Johnson M. Expert by experience: Valuing patient engagement in healthcare.  
19 408 In: Pomey M-P, Denis J-L, Dumez V, editors. *Patient Engagement: How patient-provider partnerships*  
20 409 *transform healthcare organisations*. Cham, Switzerland: Palgrave Macmillan; 2019. p. p. 233-67.
- 21 410 17. Tricco AC, Lillie E, Zarin W, O'Brien KK, Colquhoun H, Levac D, et al. PRISMA Extension for  
22 411 Scoping Reviews (PRISMA-ScR): Checklist and Explanation. *Ann Intern Med*. 2018;169(7):467-73.
- 23 412 18. Ghosh I. Infographic: which rare diseases are the most common? : Visual Capitalist; 2019  
24 413 [Available from: <https://www.visualcapitalist.com/which-rare-diseases-are-the-most-common/>].
- 25 414 19. Nicholl H, Tracey C, Begley T, King C, Lynch MA. Internet Use by Parents of Children With  
26 415 Rare Conditions: Findings From a Study on Parents? *Web Information Needs*. *J Med Internet Res*.  
27 416 2017;19(2):e51.
- 28 417 20. Ruther DF, Sebode M, Lohse AW, Wernicke S, Bottinger E, Casar C, et al. Mobile app  
29 418 requirements for patients with rare liver diseases: A single center survey for the ERN RARE-LIVER.  
30 419 *Clinics and Research in Hepatology and Gastroenterology*. 2021;45(6).
- 31 420 21. Aizawa R, Sunahara H, Kume K, Tsuchiya S, Adachi H, Kanbayashi T, et al. Status of  
32 421 narcolepsy-related information available on the Internet in Japan and its effective use. *Sleep and*  
33 422 *Biological Rhythms*. 2008;6(4):201-7.
- 34 423 22. Barazani Brutman T, Bashari D, Lenda H, Leiba Fisher R, Azar Avivi S, Kenet G. New  
35 424 communication technologies improve hemophilia care. *Haemophilia*; February2017. p. 134-5.
- 36 425 23. Colman AW, Sellick JFK, Weaver JU. Use of Quick Response (QR) coded bracelets and cards  
37 426 for the improvement of cortisol deficiency/Addison's disease management: An audit of quality of  
38 427 care of the management of steroid deficiency in acute illness. *BMJ Innovations*. 2018;4(3):115-22.
- 39 428 24. Ackbarali TA, Croteau SE, Pipe SW, Tickle K, Long L, Wilkes S, et al. Assessing Patient and  
40 429 Provider Perspectives, Clinical Practice, Behaviors, and Knowledge on Hemophilia A Care. *Blood*; 05  
41 430 Nov2020. p. 24-5.
- 42 431 25. Armayones M, Hernandez-Encuentra E, Gomez-Zuniga B, Guillamon N, Ontiveros G, Bosque  
43 432 A, et al. APTIC: A social network to improve the quality of life of members of patients' associations.  
44 433 *Orphanet Journal of Rare Diseases Conference: 5th European Conference on Rare Diseases,*  
45 434 *ECRD2010*.
- 46 435 26. Badiu C, Bonomi M, Borshchevsky I, Cools M, Craen M, Ghervan C, et al. Developing and  
47 436 evaluating rare disease educational materials co-created by expert clinicians and patients: the  
48 437 paradigm of congenital hypogonadotropic hypogonadism. *Orphanet Journal of Rare Diseases*.  
49 438 2017;12(1) (no pagination).
- 50 439 27. Barazani Brutman T, Bashari D, Lenda H, Leiba Fisher R, Azar Avivi S, Kenet G. New  
51 440 communication technologies improve hemophilia care. *Haemophilia*. 2017;23(Supplement 2):134-5.
- 52 441 28. Boon M, Calvo-Lerma J, Claes I, Havermans T, Asseiceira I, Bulfamante A, et al. Use of a  
53 442 mobile application for self-management of pancreatic enzyme replacement therapy is associated

1  
2  
3  
4  
5  
6  
7  
8  
9  
10  
11  
12  
13  
14  
15  
16  
17  
18  
19  
20  
21  
22  
23  
24  
25  
26  
27  
28  
29  
30  
31  
32  
33  
34  
35  
36  
37  
38  
39  
40  
41  
42  
43  
44  
45  
46  
47  
48  
49  
50  
51  
52  
53  
54  
55  
56  
57  
58  
59  
60

with improved gastro-intestinal related quality of life in children with Cystic Fibrosis. *Journal of Cystic Fibrosis*. 2020;19(4):562-8.

29. Breakey VR, Ignas DM, Warias AV, White M, Blanchette VS, Stinson JN. A pilot randomized control trial to evaluate the feasibility of an Internet-based self-management and transitional care program for youth with haemophilia. *Haemophilia*. 2014;20(6):784-93.

30. Calvo-Lerma J, Boon M, Hulst J, Colombo C, Asseiceira I, Garriga M, et al. Change in nutrient and dietary intake in european children with cystic fibrosis after a 6-month intervention with a self-management mhealth tool. *Nutrients*. 2021;13(6) (no pagination).

31. Castro RA, Chougui K, Bilodeau C, Tsimicalis A. Exploring the Views of Osteogenesis Imperfecta Caregivers on Internet-Based Technologies: Qualitative Descriptive Study. *J Med Internet Res*. 2019;21(12):e15924.

32. Cipriani D, Dulcan E. See and be seen: The CF community. *Pediatric Pulmonology*; September2017. p. 147-8.

33. Cummings E, Hauser J, Cameron-Tucker H, Fitzpatrick P, Jessup M, Walters EH, et al. Enhancing self-efficacy for self-management in people with cystic fibrosis. *Studies in Health Technology and Informatics*. 2011;169:33-7.

34. D'Ambrosio C. Open versus closed social networking groups. *Haemophilia*; May2014. p. 183.

35. Decker K, Meilleur C. CBDR and MyCBDR advancing hemophilia nursing practice in Canada. *Haemophilia*; May2018. p. 37.

36. Haik D, Kashanchi K, Tajran S, Heilbronn C, Anderson C, Francis DO, et al. The Online Support Group as a Community: A Thematic Content Analysis of an Online Support Group for Idiopathic Subglottic Stenosis. *Annals of Otology, Rhinology and Laryngology*. 2019;128(4):293-9.

37. Kauw D, Repping-Wuts H, Noordzij A, Stikkelbroeck N, Hermus A, Faber M. The Contribution of Online Peer-to-Peer Communication Among Patients With Adrenal Disease to Patient-Centered Care. *J Med Internet Res*. 2015;17(3):e54.

38. Kirk S, Milnes L. An exploration of how young people and parents use online support in the context of living with cystic fibrosis. *Health expectations*. 2016;19(2):309-21.

39. Kühnle L, Mücke U, Lechner MW, Klawonn F, Grigull L. Development of a Social Network for People Without a Diagnosis (RarePairs): Evaluation Study. *J Med Internet Res*. 2020;22(9):e21849.

40. Lee Yeong J, Thomas P, Buller J, Moosajee M. A Newly Developed Web-Based Resource on Genetic Eye Disorders for Users With Visual Impairment (Gene.Vision): Usability Study. *J Med Internet Res*. 2021;23(1):e19151.

41. Manu-Pereira MM, Gutierrez-Valle V, Vives-Corrans JL, Laudet IPE. ENERCA: Towards a European Reference Network (ERN) in rare haematological diseases. *British Journal of Haematology*; April2016. p. 39-40.

42. Moon H, Moon J. Comparative readability analysis of information on exercise for hemophilia patients. *Haemophilia*. 2021;27(SUPPL 2):57.

43. Osara Y, Coakley K, Devarajan A, Singh RH. Development of newborn screening connect (NBS connect): a self-reported patient registry and its role in improvement of care for patients with inherited metabolic disorders. *Orphanet Journal Of Rare Diseases*. 2017;12(1):132.

44. Paglialonga A, Gaetano R, Robert L, Hurard M, Botella LM, Barr N, et al. eHealth for patients with rare diseases: the eHealth Working Group of the European Reference Network on Rare Multisystemic Vascular Diseases (VASCERN). *Orphanet Journal of Rare Diseases*. 2021;16(1):164.

45. Richesson RL, Lee HS, Cuthbertson D, Lloyd J, Young K, Krischer JP. An automated communication system in a contact registry for persons with rare diseases: Scalable tools for identifying and recruiting clinical research participants. *Contemporary Clinical Trials*. 2009;30(1):55-62.

46. Rits S, Snell C, Uluer AZ. Weekly patient webcasts: An adult CF center's response to the COVID-19 pandemic. *Pediatric Pulmonology*; October2020. p. 78.

47. Rodman J, Krivec U, Jackson A. Patient perspectives on electronic access to registry health records: An Irish-Slovene online survey. *Journal of Cystic Fibrosis*. 2016;15(Supplement 1):S36.

- 1  
2  
3 494 48. Storf H, Hartz T, Tegtbauer N, Pfeiffer W, Schmidtke J, Graessner H, et al. Vision and  
4 495 challenges of a cartographic representation of expert medical centres for rare diseases. *Studies in*  
5 496 *health technology and informatics*. 2014;205:677-81.  
6 497 49. Walker KK. Cognitive and affective uses of a Thoracic Outlet Syndrome Facebook support  
7 498 group. *Health Communication*. 2014;29(8):773-81.  
8 499 50. Wittmeier K, Holland C, Hobbs-Murison K, Crawford E, Beauchamp C, Milne B, et al. Analysis  
9 500 of a Parent-Initiated Social Media Campaign for Hirschsprung's Disease. *J Med Internet Res*.  
10 501 2014;16(12):e288.  
11 502 51. Wood J, Jenkins S, Putrino D, Mulrennan S, Morey S, Cecins N, et al. A smartphone  
12 503 application for reporting symptoms in adults with cystic fibrosis improves the detection of  
13 504 exacerbations: Results of a randomised controlled trial. *Journal of Cystic Fibrosis*. 2020;19(2):271-6.  
14 505 52. Huang X, Chen L, Shao S, Yang R, Ma X, Xue F. Developing and evaluating HE-APP:  
15 506 Acceptability and usability of a smartphone APP system to improve self-management in Chinese  
16 507 patients with hemophilia. *Haemophilia*; June2020. p. 99.  
17 508 53. Ho G, Ueda K, Houben RFA, Joa J, Giezen A, Cheng B, et al. Metabolic Diet App Suite for  
18 509 inborn errors of amino acid metabolism. *Molecular Genetics and Metabolism*. 2016;117(3):322-7.  
19 510 54. Floch J, Vilarinho T, Zettl A, Ibanez-Sanchez G, Calvo-Lerma J, Stav E, et al. Users' Experiences  
20 511 of a Mobile Health Self-Management Approach for the Treatment of Cystic Fibrosis: Mixed Methods  
21 512 Study. *JMIR mHealth and uHealth*. 2020;8(7):e15896.  
22 513 55. Grande SW, Kotzbauer G, Hager A, Martensson M, Longacre M. Improving care for pediatric  
23 514 cystic fibrosis in Sweden using a successful mHealth patient support system. *Pediatric Pulmonology*;  
24 515 September2017. p. 435.  
25 516 56. Breakey VR, Warias A, Ignas DM, Blanchette VS, Stinson J. Usability testing of an online  
26 517 transition program for adolescents with hemophilia. *Haemophilia*; March2012. p. 31.  
27 518 57. Khair K, Collier C, Holland M, Smith S. The role of social networking in haemophilia  
28 519 management. *Haemophilia*; July2010. p. 129-30.  
29 520 58. Khair K, Holland M, Carrington S. Social networking for adolescents with severe haemophilia.  
30 521 *Haemophilia*. 2012;18(3):e290-e6.  
31 522 59. Balestri E, Vergnani S, Dall'Ara S, Grazioli C, Mannozi B, Ambroni M, et al. 'F (accio) C  
32 523 (entro)': Project for a smartphone application to increase adherence to aerosol treatment in  
33 524 adolescents with cystic fibrosis. *Italian Journal of Pediatrics Conference: 25th Italian Congress of*  
34 525 *Cystic Fibrosis and the 15th National Congress of Cystic Fibrosis Italian Society Milan Italy2020*.  
35 526 60. Carr SB, Ronan P, Lorenc A, Mian A, Madge SL, Robinson N. Children and adults Tai Chi study  
36 527 (CF-CATS2): A randomised controlled feasibility study comparing internet-delivered with face-to-face  
37 528 Tai Chi lessons in cystic fibrosis. *ERJ Open Research*. 2018;4(4).  
38 529 61. Cox NS, Alison JA, Button BM, Wilson JW, Holland AE. Feasibility and acceptability of an  
39 530 Internet-Based program to promote physical activity in adults with cystic fibrosis. *Respiratory Care*.  
40 531 2015;60(3):422-9.  
41 532 62. Howard S, Speight L, Mills-Bennett R, Lau D, Ketchell RI, Duckers J. The All Wales Adult Cystic  
42 533 Fibrosis Centre (AWACFC) Virtual Instruction of Exercise with Technology to Enhance Care-VIEWTEC  
43 534 Programme. *J Cystic Fibrosis*; June2014. p. S20.  
44 535 63. Guilliams JM, Garvin M, Szelove H, Lea Kelly M, Lynch Y, Luo SW, et al. Feasibility and  
45 536 usefulness of a mobile health exercise intervention in women with lymphangioleiomyomatosis.  
46 537 *Cardiopulmonary Physical Therapy Journal*; July2021. p. e7.  
47 538 64. Lomotey RK, Mulder K, Nilson J, Schachter C, Wittmeier K, Deters R. Mobile self-  
48 539 management guide for young men with mild hemophilia in cases of minor injuries. *Network*  
49 540 *Modeling Analysis in Health Informatics and Bioinformatics*. 2014;3(1).  
50 541 65. Nilson J, Mulder K, Schachter C, Wittmeier K, Lomotey R, Arnold C, et al. Development,  
51 542 evaluation and updates of HIRT? (Hemophilia injury recognition tool). *Haemophilia*; May2018. p.  
52 543 136.  
53  
54  
55  
56  
57  
58  
59  
60



- 1  
2  
3 544 66. Calvo-Lerma J, Boon M, Colombo C, de Koning B, Asseiceira I, Garriga M, et al. Clinical  
4 545 evaluation of an evidence-based method based on food characteristics to adjust pancreatic enzyme  
5 546 supplements dose in cystic fibrosis. *Journal of Cystic Fibrosis*. 2020.
- 6 547 67. Ingravallo F, Vignatelli L, Pagotto U, Vandi S, Mangiaruga A, Moresco M, et al. Telemedicine  
7 548 with mobile internet devices for innovative multidisciplinary patientcentred care of patients with  
8 549 narcolepsy. Protocol of the randomized controlled trial TENAR (TElemedicine for NARcolepsy). *Euro*  
9 550 *J Neurol*; May2020. p. 516.
- 10 551 68. Parrott H, Elborn S, Madge S. A digital solution for virtual consultation and sharing health  
11 552 data in adults with cystic fibrosis. *J Cystic Fibrosis*; June2019. p. S51.
- 12 553 69. Lassandro G, Annichiarico G, Scherillo MR, Cassone C, Giordano P. EMO.TI.ON.: Technologies  
13 554 for the safety of children with hemophilia. *Blood Transfusion*; November2017. p. s539.
- 14 555 70. Verkleij M, Georgiopoulos AM, Friedman D. Development and evaluation of an internet-  
15 556 based cognitive behavioral therapy intervention for anxiety and depression in adults with cystic  
16 557 fibrosis (eHealth CF-CBT): An international collaboration. *Internet Interventions*. 2021;24 (no  
17 558 pagination).
- 18 559 71. Manu-Pereira MM, Gutierrez-Valle V, Vives-Corrans JL, Laudet IPE. ENERCA: Towards a  
19 560 European Reference Network (ERN) in rare haematological diseases. *British Journal of Haematology*.  
20 561 2016;173(Supplement 1):39-40.
- 21 562 72. Rudolf I, Pieper K, Nolte H, Junge S, Dopfer C, Sauer-Heilborn A, et al. Assessment of a  
22 563 Mobile App by Adolescents and Young Adults With Cystic Fibrosis: Pilot Evaluation. *JMIR mHealth*  
23 564 *and uHealth*. 2019;7(11):e12442.
- 24 565 73. Timmer AM, Kloek JCJ, de Kleijn P, Kuijlaars RIA, Schutgens GRE, Veenhof C, et al. A Blended  
25 566 Physiotherapy Intervention for Persons With Hemophilic Arthropathy: Development Study. *J Med*  
26 567 *Internet Res*. 2020;22(6):e16631.
- 27 568 74. Sottilotta G, Arrigo P, Drago L, Mallamace E, Martorano S, Romeo E, et al. The HEMONLINE  
28 569 project: Preliminary results. *Haemophilia*; July2012. p. 77.
- 29 570 75. Stevenson Won A, Barreau CA, Gaertner M, Stone T, Zhu J, Wang YC, et al. Assessing the  
30 571 Feasibility of an Open-Source Virtual Reality Mirror Visual Feedback Module for Complex Regional  
31 572 Pain Syndrome: Pilot Usability Study. *J Med Internet Res*. 2021;23(5):e16536.
- 32 573 76. Naik H, Balwani M, Doheny D, Liu L, Desnick R. Experience with a pilot skype internet  
33 574 support group for symptomatic patients with acute intermittent porphyria. *Clinical Chemistry and*  
34 575 *Laboratory Medicine*; May2013. p. eA10.
- 35 576 77. Blackwell LS, Romero SL, Romero CV, McLean KA, Dawkins K, Hoag J, et al. Cffone: A social  
36 577 networking site for adolescents and young adults with cf. *Pediatric Pulmonology*; September2012.  
37 578 p. 430.
- 38 579 78. Sanders DB, Bittner RCL, Rosenfeld M, Hoffman LR, Redding GJ, Goss CH. Failure to Recover  
39 580 to Baseline Pulmonary Function after Cystic Fibrosis Pulmonary Exacerbation. *Am J Resp Critical Care*  
40 581 *Med*. 2010;182(5):627-32.
- 41 582 79. Cipriano LE, Rupar CA, Zaric GS. The Cost-Effectiveness of Expanding Newborn Screening for  
42 583 up to 21 Inherited Metabolic Disorders Using Tandem Mass Spectrometry: Results from a Decision-  
43 584 Analytic Model. *Value in Health*. 2007;10(2):83-97.
- 44 585 80. Nilsson IM, Berntorp E, Löfqvist T, Pettersson H. Twenty-five years' experience of  
45 586 prophylactic treatment in severe haemophilia A and B. *J Intern Med*. 1992;232(1):25-32.
- 46 587 81. Howard S, Speight L, Mills-Bennett R, Lau D, Ketchell RI, Duckers J. The All Wales Adult Cystic  
47 588 Fibrosis Centre (AWACFC) Virtual Instruction of Exercise with Technology to Enhance Care-VIEWTEC  
48 589 Programme. *Journal of Cystic Fibrosis*. 2014;2):S20.
- 49 590 82. Sottilotta G, Arrigo P, Drago L, Mallamace E, Martorano S, Romeo E, et al. The HEMONLINE  
50 591 project: Preliminary results. *Haemophilia*. 2012;3):77.
- 51 592 83. Khair K, Holland M, Carrington S. Social networking for adolescents with haemophilia.  
52 593 *Haemophilia*; March2011. p. 369.
- 53  
54  
55  
56  
57  
58  
59  
60

- 1  
2  
3 594 84. Cox NS, Eldridge B, Rawlings S, Dreger J, Corda J, Hauser J, et al. A web-based intervention to  
4 595 promote physical activity in adolescents and young adults with cystic fibrosis: protocol for a  
5 596 randomized controlled trial. *BMC polm*. 2019;19(1):253.  
6  
7 597 85. Lewis T. Improving quality of life in patients with cystic fibrosis with exercise: CF foundation  
8 598 impact grant update. *Pediatric Pulmonology*; October 2019. p. 385-6.  
9 599 86. Wagner B, Seuser A, Kruger S, Herzig ML, Hilberg T, Ay C, et al. Establishing an online  
10 600 physical exercise program for people with hemophilia. *Wiener Klinische Wochenschrift*.  
11 601 2019;131(21-22):558-66.  
12 602 87. Foronda CL, Kelley CN, Nadeau C, Prather SL, Lewis-Pierre L, Sarik DA, et al. Psychological  
13 603 and Socioeconomic Burdens Faced by Family Caregivers of Children With Asthma: An Integrative  
14 604 Review. *Journal of Pediatric Health Care*. 2020;34(4):366-76.  
15 605 88. Suarez-Lledo V, Alvarez-Galvez J. Prevalence of Health Misinformation on Social Media:  
16 606 Systematic Review. *J Med Internet Res*. 2021;23(1):e17187.  
17 607 89. McMullan J, Crowe AL, Bailie C, Moore K, McMullan LS, Shamandi N, et al. Improvements  
18 608 needed to support people living and working with a rare disease in Northern Ireland: current rare  
19 609 disease support perceived as inadequate. *Orphanet Journal of Rare Diseases*. 2020;15(1):315.  
20 610 90. Fidika A, Herle M, Lehmann C, Weiss C, Knaevelsrud C, Goldbeck L. A web-based  
21 611 psychological support program for caregivers of children with cystic fibrosis: A pilot study. *Health  
22 612 and Quality of Life Outcomes*. 2015;13(1) (no pagination).  
23 613 91. Linton L, Aruru M. Evaluating the readability of patient education materials across multiple  
24 614 sclerosis and rheumatoid arthritis disease states. *J Am Pharm Assoc*. 2013;53 (2):e28.

615

## 616 Figure legends

617 Figure 1: PRISMA flowchart for the search. (*JMIR* = *Journal of Medical Internet Research*; *OJRD* =  
618 *Orphanet Journal of Rare Diseases*)

619 Figure 2: Countries in which included studies were undertaken (frequency of papers).

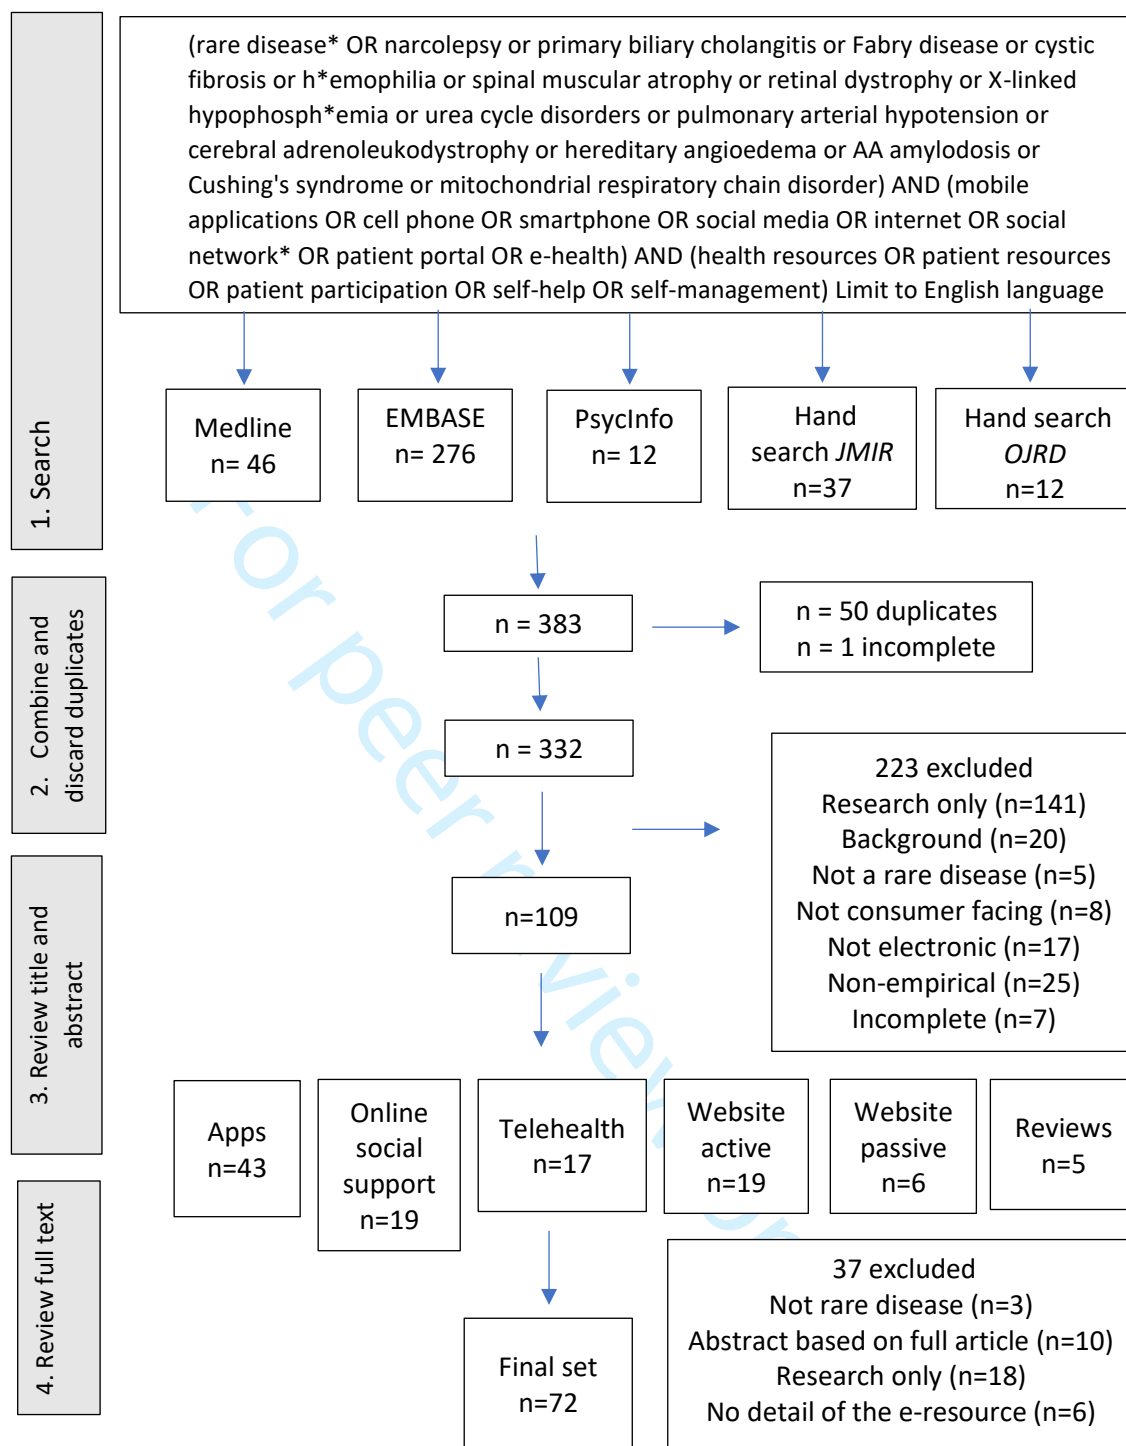



1  
2  
3  
4  
5  
6  
7  
8  
9  
10  
11  
12  
13  
14  
15  
16  
17  
18  
19  
20  
21  
22  
23  
24  
25  
26  
27  
28  
29  
30  
31  
32  
33  
34  
35  
36  
37  
38  
39  
40  
41  
42  
43  
44  
45  
46  
47  
48  
49  
50  
51  
52  
53  
54  
55  
56  
57  
58  
59  
60

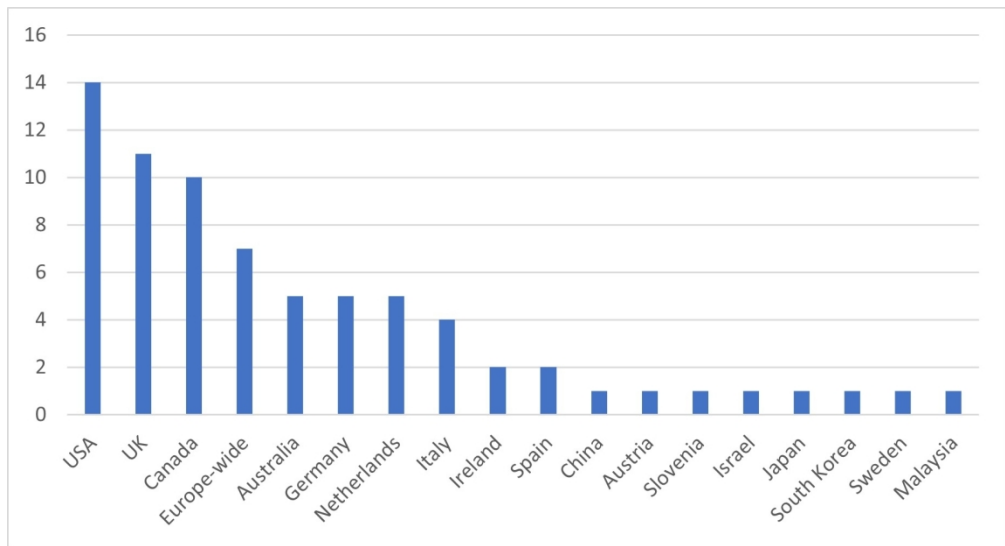

Figure 2: Countries in which included studies were undertaken (frequency of papers).

141x76mm (330 x 330 DPI)

## PRISMA-ScR Checklist

| Section             | Subsection                                           | Item | Page of Mss                |
|---------------------|------------------------------------------------------|------|----------------------------|
| <b>Title</b>        |                                                      | 1    | 1                          |
| <b>Abstract</b>     | Structured summary                                   | 2    | 1                          |
| <b>Introduction</b> | Rationale                                            | 3    | 3                          |
|                     | Objectives                                           | 4    | 4                          |
| <b>Methods</b>      | Protocol and registration                            | 5    | 4                          |
|                     | Eligibility criteria                                 | 6    | 4                          |
|                     | Information sources                                  | 7    | 4                          |
|                     | Search                                               | 8    | 4                          |
|                     | Selection of sources of evidence                     | 9    | 4                          |
|                     | Data charting process                                | 10   | 5                          |
|                     | Data items                                           | 11   | 5                          |
|                     | Critical appraisal of individual sources of evidence | 12   | NA for this scoping review |
|                     | Summary measures                                     | 13   | NA for scoping reviews     |
|                     | Synthesis of results                                 |      | 5                          |
|                     | Risk of bias across studies                          | 15   | NA for scoping reviews     |
|                     | Additional analysis                                  | 16   | NA for scoping reviews     |
| <b>Results</b>      | Selection of sources of evidence                     | 17   | 5 ff                       |
|                     | Characteristics of sources of evidence               | 18   | 7 ff                       |
|                     | Critical appraisal within sources of evidence        | 19   | NA for this scoping review |
|                     | Synthesis of results                                 | 20   | 8, 12                      |
|                     | Risk of bias across studies                          | 22   | NA for scoping reviews     |
|                     | Additional analysis                                  | 23   | NA for scoping reviews     |
| <b>Discussion</b>   | Summary of evidence                                  | 24   | 13                         |
|                     | Limitations                                          | 25   | 14                         |
|                     | Conclusions                                          | 26   | 14                         |
| <b>Funding</b>      |                                                      | 27   | 15                         |

From: Tricco AC, Lillie E, Zarin W, O'Brien KK, Colquhoun H, Levac D, et al. PRISMA Extension for Scoping Reviews (PRISMA-ScR): Checklist and Explanation. Ann Intern Med. 2018;169(7):467-73.

1  
2  
3  
4  
5  
6  
7  
8  
9  
10  
11  
12  
13  
14  
15  
16  
17  
18  
19  
20  
21  
22  
23  
24  
25  
26  
27  
28  
29  
30  
31  
32  
33  
34  
35  
36  
37  
38  
39  
40  
41  
42  
43  
44  
45  
46  
47  
48  
49  
50  
51  
52  
53  
54  
55  
56  
57  
58  
59  
60

For peer review only

1  
2  
3  
4 Search string Ovid: Medline, Embase, Psycinfo

5 rare disease.mp. [mp=ti, ab, hw, tn, ot, dm, mf, dv, kw, fx, dq, nm, kf, ox, px, rx, an, ui, sy, tc, id, tm,  
6 mh]

7  
8 OR

9  
10 (narcolepsy or primary biliary cholangitis or Fabry disease or cystic fibrosis or h\*emophilia or spinal  
11 muscular atrophy or retinal dystrophy or X-linked hypophosph\*emia or urea cycle disorders or  
12 pulmonary arterial hypotension or cerebral adrenoleukodystrophy or hereditary angioedema or AA  
13 amyloidosis or Cushing's syndrome or mitochondrial respiratory chain disorders).mp. [mp=ti, ab, hw,  
14 tn, ot, dm, mf, dv, kw, fx, dq, nm, kf, ox, px, rx, an, ui, sy, tc, id, tm, mh]

15  
16 AND

17  
18 "Quality of Life"/ or "Delivery of Health Care"/ or Patient Advocacy/ or Patient Participation/ or  
19 patient education.mp / or Self-Help Groups/ or Health Resources.mp. [mp=ti, ab, hw, tn, ot, dm, mf,  
20 dv, kw, fx, dq, nm, kf, ox, px, rx, an, ui, sy, tc, id, tm, mh]

21  
22 AND

23  
24 Mobile Applications/ or Cell Phone/ or Smartphone/ or Social Media/ or Internet/ or Social  
25 Networking/ or Patient Portal.mp/ e-health [mp=ti, ab, hw, tn, ot, dm, mf, dv, kw, fx, dq, nm, kf, ox,  
26 px, rx, an, ui, sy, tc, id, tm, mh]

27  
28 Limit to English language

29  
30  
31  
32 Hand search of Orphanet Journal of Rare Diseases

33  
34 Electronic resources/ or e-health/ or m-health/ or apps/ or mobile/ or telehealth/ or virtual

35  
36  
37  
38 Hand search of Journal of Medical Internet Research

39  
40 Rare dis\*/ narcolepsy/ or primary biliary cholangitis/ or Fabry disease/ or cystic fibrosis/ or  
41 h\*emophilia/ or spinal muscular atrophy/ or retinal dystrophy/ or X-linked hypophosph\*emia/ or  
42 urea cycle disorders/ or pulmonary arterial hypotension/ or cerebral adrenoleukodystrophy/ or  
43 hereditary angioedema/ or AA amyloidosis/ or Cushing's syndrome/ or mitochondrial respiratory  
44 chain disorders.  
45  
46  
47  
48  
49  
50  
51  
52  
53  
54  
55  
56  
57  
58  
59  
60

|   | A                                                                                                                                                                                                                                                                               | B    | C       | D               | E                                                                         | F                     | G                   | H                                                                                                                                 | I                                                                                                                                                                                                                                                                                                                                                                                        | J               | K            | L                                                                                                                                                                                                                                                                                                                                                             | M                                                                                                          |
|---|---------------------------------------------------------------------------------------------------------------------------------------------------------------------------------------------------------------------------------------------------------------------------------|------|---------|-----------------|---------------------------------------------------------------------------|-----------------------|---------------------|-----------------------------------------------------------------------------------------------------------------------------------|------------------------------------------------------------------------------------------------------------------------------------------------------------------------------------------------------------------------------------------------------------------------------------------------------------------------------------------------------------------------------------------|-----------------|--------------|---------------------------------------------------------------------------------------------------------------------------------------------------------------------------------------------------------------------------------------------------------------------------------------------------------------------------------------------------------------|------------------------------------------------------------------------------------------------------------|
|   | Reference                                                                                                                                                                                                                                                                       | Year | Country | Rare disease    | Name of intervention/resource if applicable                               | Research or available |                     | Needs/barriers to care                                                                                                            | Details                                                                                                                                                                                                                                                                                                                                                                                  | e-resource      | Language/s   | e-resource details                                                                                                                                                                                                                                                                                                                                            | Findings (If research only)                                                                                |
| 1 | Ackbarali TA, et al. Assessing Patient and Provider Perspectives, Clinical Practice, Behaviors, and Knowledge on Hemophilia A Care. <i>Blood</i> ; 05 Nov2020. p. 24-5.                                                                                                         | 2020 | USA     | Haemophilia     | a web-based joint educational initiative for patients/caregivers and HCPs | Research              | Conference abstract | Management of severe haemophilia is rapidly evolving - patients, carers and HCPs alike unsure of new treatments but keen to learn |                                                                                                                                                                                                                                                                                                                                                                                          | website active  | Not given    | 1-hour online video-based CME activity for HCPs and 1-hour healthcare education activity for patients were created in June, 2020 to address identified practice and knowledge needs among HCPs, and knowledge, communication and self-efficacy behaviors among patients. Each activity consisted of slides, polling and live questions, and remains on-demand |                                                                                                            |
| 2 | Aizawa R, et al. Status of narcolepsy-related information available on the Internet in Japan and its effective use. <i>Sleep and Biological Rhythms</i> . 2008;6(4):201-7.                                                                                                      | 2008 | Japan   | Narcolepsy      | Existing internet resources                                               | publicly available    | Journal article     | High quality web-based information can reduce time to diagnosis for people with narcolepsy                                        | Useful, harmful information is low on search engine rankings.                                                                                                                                                                                                                                                                                                                            | website passive | Not given    | Existing web-based resources                                                                                                                                                                                                                                                                                                                                  | Patients were asking for info on the hereditary nature of the disease and ways to deal with their disease. |
| 3 | Al-Saleh H, et al. Beta testing of the "MY CF" smartphone/tablet app: In patients with cystic fibrosis. Conference Abstract presented at American Journal of Respiratory and Critical Care Medicine. Conference: American Thoracic Society International Conference, ATS; 2014. | 2014 | USA     | Cystic fibrosis | MY CF                                                                     | Research              | Conference abstract | Complicated self-management                                                                                                       | Difficulties keeping track of medications, test results and symptoms for adolescents or parents of younger children with CF.                                                                                                                                                                                                                                                             | App             |              | Android OS for phone or tablet. The three most favored functionalities of the app were: Medication list, Symptom Diary, and Weight/Height/Body Mass Index monitoring. 32 invited to participate; of 23 who did, majority wanted to continue using it and would recommend it                                                                                   |                                                                                                            |
| 4 | Armayones M, et al. APTIC: A social network to improve the quality of life of members of patients' associations. Conference Abstract presented at Orphanet Journal of Rare Diseases. Conference: 5th European Conference on Rare Diseases, ECRD; 2010.                          | 2010 | Spain   | Rare diseases   | APTIC                                                                     | publicly available    | Conference abstract | Fragmentation of information regarding rare diseases                                                                              | Need for people to learn from one another, share experiences                                                                                                                                                                                                                                                                                                                             | social platform | Not given    | Social networking platform that aims at enabling the individual members of patients' associations (mostly parents of children with chronic and rare diseases) to share experiences, information, advice                                                                                                                                                       |                                                                                                            |
| 5 | Aznar J, et al. Telemedicine in Hemophilia: Virtual consultation for the hematologist at patient's home. <i>Haemophilia</i> ; July2012. p. 72.                                                                                                                                  | 2012 | Spain   | Haemophilia     | domiciliary virtual consultation and virtual monitoring tools             | Research              | Conference abstract | Frequent hospital visits impact QoL                                                                                               | Domiciliary replacement therapy (DRT) ensures rapid infusion of lacking factors when any bleeding episode occurs and reduces hospital dependency of patients with hemophilia. However, these patients still have to visit the hospital frequently because the hematologist can prescribe general guidelines for home-replacement therapy but cannot adapt them to the bleeding evolution | telehealth      | Not reported | Three interventions: (1) patient entered bleeding episode and self managed treatment; (2) virtual monitoring by ultrasound of haemarthroses, (3) Virtual consult                                                                                                                                                                                              | Successful in 45 patients which in turn may decrease dependency on hospital visits and by association QoL  |
| 6 |                                                                                                                                                                                                                                                                                 |      |         |                 |                                                                           |                       |                     |                                                                                                                                   |                                                                                                                                                                                                                                                                                                                                                                                          |                 |              |                                                                                                                                                                                                                                                                                                                                                               |                                                                                                            |

|    | A                                                                                                                                                                                                                                                                                                                                                                         | B    | C      | D                                                                                          | E                                       | F        | G                   | H                                                                                                                                                                  | I                                                                                                                                                                                                                                                                                                                                                                                                      | J               | K                                                    | L                                                                                                                                                                                                                                                                                                                                                                                                                                                                     | M                                                                                                                                                                                                                        |
|----|---------------------------------------------------------------------------------------------------------------------------------------------------------------------------------------------------------------------------------------------------------------------------------------------------------------------------------------------------------------------------|------|--------|--------------------------------------------------------------------------------------------|-----------------------------------------|----------|---------------------|--------------------------------------------------------------------------------------------------------------------------------------------------------------------|--------------------------------------------------------------------------------------------------------------------------------------------------------------------------------------------------------------------------------------------------------------------------------------------------------------------------------------------------------------------------------------------------------|-----------------|------------------------------------------------------|-----------------------------------------------------------------------------------------------------------------------------------------------------------------------------------------------------------------------------------------------------------------------------------------------------------------------------------------------------------------------------------------------------------------------------------------------------------------------|--------------------------------------------------------------------------------------------------------------------------------------------------------------------------------------------------------------------------|
| 7  | Badiu C, et al. Developing and evaluating rare disease educational materials co-created by expert clinicians and patients: the paradigm of congenital hypogonadotropic hypogonadism. Orphanet Journal of Rare Diseases. 2017;12(1)                                                                                                                                        | 2017 | Europe | congenital hypogonadotropic hypogonadism (CHH) and the olfacto-genital (Kallmann) syndrome | Educational package                     | Research | Journal article     | Need for high quality information/education on rare diseases                                                                                                       | Important it is easy to read and engaging                                                                                                                                                                                                                                                                                                                                                              | website passive | 20 languages                                         | patient education materials                                                                                                                                                                                                                                                                                                                                                                                                                                           | Appropriate reading level and accessibility                                                                                                                                                                              |
| 8  | Balestri E, et al. 'F (accio) C (entro)': Project for a smartphone application to increase adherence to aerosol treatment in adolescents with cystic fibrosis. Conference Abstract presented at Italian Journal of Pediatrics. Conference: 25th Italian Congress of Cystic Fibrosis and the 15th National Congress of Cystic Fibrosis Italian Society. Milan Italy; 2020. | 2020 | Italy  | Cystic fibrosis                                                                            | Faccio Centro                           | Research | Conference abstract | Complicated self-management with decreasing adherence from adolescents                                                                                             | Patients with Cystic fibrosis have onerous therapy - respiratory physiotherapy, therapy by aerosol, oral, intravenous and physical activity. During adolescence the therapy adherence, that is undergoing treatments at the right time of the day, in the right sequence and dosage, considerably decreases with negative consequences in terms of: health status, quality of life and hospitalization | App             |                                                      | Mobile phone app - lists daily therapy, with instructions on order, progress tracking, alerts for when to start and when checks are needed. Also can email questions to HCP team.                                                                                                                                                                                                                                                                                     |                                                                                                                                                                                                                          |
| 9  | Barazani Brutman T, et al. New communication technologies improve hemophilia care. Haemophilia. 2017;23(Supplement 2):134-5.                                                                                                                                                                                                                                              | 2017 | Israel | Haemophilia                                                                                | WhatsApp social support group messaging | Research | Conference abstract | Parents with newly diagnosed children require immediate response when things happen                                                                                |                                                                                                                                                                                                                                                                                                                                                                                                        | social platform | Not given                                            | Social support groups of parents, patients and medical staff WhatsApp. Parents, patients and medical staff used the WhatsApp application installed on smartphone to provide immediate response to various issues: queries regarding bleeds (with relevant photos), queries regarding dosage/ frequency of therapy, queries about quality of life (QoL) and specific situations noted at school/ kindergarden, personal communication and general consult and support. | Extension of physical groups at the treatment centre.                                                                                                                                                                    |
| 10 | Blackwell LS, et al. CFone: A social networking site for adolescents and young adults with cf. Pediatric Pulmonology. 2012;35):430.                                                                                                                                                                                                                                       | 2012 | USA    | Cystic fibrosis                                                                            | CFOne                                   | Research | Conference abstract | Transition from child to adult requires increased independence and self efficacy                                                                                   | Social support associated with better psychological wellbeing and better outcomes.                                                                                                                                                                                                                                                                                                                     | social platform | Not given                                            | online peer support program for adolescents and young adults with CF                                                                                                                                                                                                                                                                                                                                                                                                  | Social networking sites for adolescents and young adults with CF may be useful for increasing knowledge of disease management, increasing perceptions of social support and improving mental health and quality of life. |
| 11 | Boon M, et al. Use of a mobile application for self-management of pancreatic enzyme replacement therapy is associated with improved gastro-intestinal related quality of life in children with Cystic Fibrosis. Journal of Cystic Fibrosis. 2020;19(4):562-568                                                                                                            | 2020 | Europe | Cystic fibrosis                                                                            | MyCyFAPP                                | Research | Journal article     | Complicated self (parental)-management for gastrointestinal distress in children                                                                                   | Most patients with cystic fibrosis (CF) suffer from pancreatic insufficiency, leading to fat malabsorption, malnutrition, abdominal discomfort and impaired growth. Pancreatic enzyme replacement therapy (PERT) effective but evidence-base on dosing still being built. This uses a new algorithm.                                                                                                   | App             | Dutch, English, Flemish, Italian, Portugese, Spanish | App calculates individual PERT-doses for optimal fat digestion and includes a symptoms diary, educational material, and it is linked to a web tool allowing HCPs to view data and give feedback.                                                                                                                                                                                                                                                                      | Increased GI QoL measures.                                                                                                                                                                                               |
| 12 | Breakey VR, et al. A feasibility study of "managing hemophilia online": An Internet-based self-management and transitional care program for teens. Haemophilia. 2012;3):207-8.                                                                                                                                                                                            | 2012 | Canada | Haemophilia                                                                                | online self-management intervention     | Research | Conference abstract | Adolescents have heightened educational needs as they learn to manage their disease and become self-sufficient in preparation for transition to adult health care. |                                                                                                                                                                                                                                                                                                                                                                                                        | website passive | English and French                                   | Online course - not clear if it is interactive. Pilot - still working it out                                                                                                                                                                                                                                                                                                                                                                                          |                                                                                                                                                                                                                          |

|    | A                                                                                                                                                                                                                                                         | B    | C      | D               | E                                                | F        | G                   | H                                                                                                                                                                                                           | I                                                                                                                                                                                                                                                                                                    | J              | K                                                    | L                                                                                                                                                                                                | M                                                                                                                                                                                                                                                                                                                                                                                                                                             |
|----|-----------------------------------------------------------------------------------------------------------------------------------------------------------------------------------------------------------------------------------------------------------|------|--------|-----------------|--------------------------------------------------|----------|---------------------|-------------------------------------------------------------------------------------------------------------------------------------------------------------------------------------------------------------|------------------------------------------------------------------------------------------------------------------------------------------------------------------------------------------------------------------------------------------------------------------------------------------------------|----------------|------------------------------------------------------|--------------------------------------------------------------------------------------------------------------------------------------------------------------------------------------------------|-----------------------------------------------------------------------------------------------------------------------------------------------------------------------------------------------------------------------------------------------------------------------------------------------------------------------------------------------------------------------------------------------------------------------------------------------|
| 13 | Breakey VR, et al. A pilot randomized control trial to evaluate the feasibility of an Internet-based self-management and transitional care program for youth with haemophilia. Haemophilia. 2014;20(6):784-93.                                            | 2014 | Canada | Haemophilia     | Teens Taking Charge: Managing Hemophilia Online' | Research | Journal article     | Adolescents have heightened educational needs as they learn to manage their disease and become self-sufficient in preparation for transition to adult health care.                                          |                                                                                                                                                                                                                                                                                                      | website active | English and French                                   | 8 week educational program on line with weekly telephone support from a trained Research Assistant.                                                                                              | Teens on the intervention arm showed significant improvement in disease-specific knowledge (P = 0.004), self-efficacy (P = 0.007) and transition preparedness (P = 0.046). There was a statistically significant improvement in knowledge in the intervention group when compared to the control group (P = 0.01). Overall, the teens found the website to be informative, comprehensive and easy to use and were satisfied with the program. |
| 14 | Breakey VR, et al. Feasibility study of a randomized control trial to evaluate an internet-based self-management program for adolescents with hemophilia: Preliminary results and observations. Journal of Thrombosis and Haemostasis; July2013. p. 1058. | 2013 | Canada | Haemophilia     | Teens Taking Charge: Managing Hemophilia Online' | Research | Conference abstract | Adolescents have heightened educational needs as they learn to manage their disease and become self-sufficient in preparation for transition to adult health care.                                          |                                                                                                                                                                                                                                                                                                      | website active | English and French                                   | 8 week educational program on line with weekly telephone support from a trained Research Assistant.                                                                                              | Overall, these teens found the website to be informative, comprehensive and easy to use and were satisfied with the program.                                                                                                                                                                                                                                                                                                                  |
| 15 | Breakey VR, et al. The value of usability testing for Internet-based adolescent self-management interventions: "Managing Hemophilia Online". BMC medical informatics and decision making. 2013;13:113.                                                    | 2013 | Canada | Haemophilia     | Teens Taking Charge: Managing Hemophilia Online' | Research | Conference abstract | Adolescents have heightened educational needs as they learn to manage their disease and become self-sufficient in preparation for transition to adult health care.                                          |                                                                                                                                                                                                                                                                                                      | website active | English and French                                   | 8 week educational program on line. Course contained multimedia components (videos, animations, quizzes)                                                                                         |                                                                                                                                                                                                                                                                                                                                                                                                                                               |
| 16 | Calvo-Lerma J, et al. Clinical evaluation of an evidence-based method based on food characteristics to adjust pancreatic enzyme supplements dose in cystic fibrosis. Journal of Cystic Fibrosis. 2020.                                                    | 2020 | Europe | Cystic fibrosis | MyCyFAPP                                         | Research | Journal article     | Complicated self (parental)-management for gastrointestinal distress in children                                                                                                                            | Most patients with cystic fibrosis (CF) suffer from pancreatic insufficiency, leading to fat malabsorption, malnutrition, abdominal discomfort and impaired growth. Pancreatic enzyme replacement therapy (PERT) effective but evidence-base on dosing still being built. This uses a new algorithm. | App            | Dutch, English, Flemish, Italian, Portugese, Spanish | App calculates individual PERT-doses for optimal fat digestion and includes a symptoms diary, educational material, and it is linked to a web tool allowing HCPs to view data and give feedback. | Improved fat absorption for those with poor baseline measures.                                                                                                                                                                                                                                                                                                                                                                                |
| 17 | Calvo-Lerma J,et al. Change in nutrient and dietary intake in european children with cystic fibrosis after a 6-month intervention with a self-management mhealth tool. Nutrients. 2021;13(6)                                                              | 2021 | Europe | Cystic fibrosis | MyCyFAPP                                         | Research | Journal article     | People with CF have increased energy needs and a diet with a specific nutrient distribution. Nutritional status is an indicator of disease prognosis and survival. Self(parental)-management is complicated | App provided educational resources about nutrition and dietary advice for parents                                                                                                                                                                                                                    | App            | Dutch, English, Flemish, Italian, Portugese, Spanish | Food diary, nutrition follow-up (goals), symptoms diary (health diary), nutrition educational material (living with CF) and messages among other functions                                       | Users had modest improvements towards the nutritional guidelines                                                                                                                                                                                                                                                                                                                                                                              |
| 18 | Carr SB, et al. Children and adults Tai Chi study (CF-CATS2): A randomised controlled feasibility study comparing internet-delivered with face-to-face Tai Chi lessons in cystic fibrosis. ERI Open Research. 2018;4(4)                                   | 2018 | UK     | Cystic fibrosis | NA                                               | Research | Journal article     | Maintaining exercise difficult for people with CF due to isolation.                                                                                                                                         | 8 lessons over 3 months, delivered face to face (n=22) or via internet (n=18) for 40 adults and children with CF.                                                                                                                                                                                    | telehealth     | English                                              | Lessons delivered over Skype; also had a DVD, booklet, stickers and tshirts aimed at different ages to increase adherence.                                                                       | Feasibility and safety were demonstrated. All participants showed significant improvements in self-reported sleep, cough (both daytime and night-time), stomach ache and breathing. No differences in lung function, health status, quality of life, sleep or mindfulness was shown before or after completing the lessons.                                                                                                                   |
| 19 | Carr SB,et al. Children and adults Tai Chi study (CF-CATS2): A randomised controlled feasibility study comparing internet-delivered with face-to-face Tai Chi lessons in cystic fibrosis. ERI Open Research. 2018;4(4).                                   | 2018 | UK     | Cystic fibrosis | Internet delivered Tai-Chi class                 | Research | Journal article     | Isolation yet needing tailored exercise                                                                                                                                                                     | Maintaining an exercise regime can be difficult in cystic fibrosis: group classes risk potential infection, yet motivation is hard to maintain when alone.                                                                                                                                           | telehealth     | English                                              | Comparison of F2F and internet classes                                                                                                                                                           | Improvements in sleep, cough, GI symptoms and breathing but no diff in lung function, ealth status and QoL. Findings same in both groups.                                                                                                                                                                                                                                                                                                     |

|    | A                                                                                                                                                                                                                                                                        | B    | C            | D                            | E                                                           | F                    | G                   | H                                                                                                                                           | I                                                                                                                                                                                                                                                                                                                                                                                                                                                                                                                                                                                                                                                                                | J               | K         | L                                                                                                | M                                                                                                                                                                                                                                                                                                                                                                                                                                                                                                                                                                                                                                                                                                                                                                                                                                                                                                                                                                                                                                                                                                                                                                                                                                                                                                                                                                                                                                                                                                                                                                                                                                                                                 |
|----|--------------------------------------------------------------------------------------------------------------------------------------------------------------------------------------------------------------------------------------------------------------------------|------|--------------|------------------------------|-------------------------------------------------------------|----------------------|---------------------|---------------------------------------------------------------------------------------------------------------------------------------------|----------------------------------------------------------------------------------------------------------------------------------------------------------------------------------------------------------------------------------------------------------------------------------------------------------------------------------------------------------------------------------------------------------------------------------------------------------------------------------------------------------------------------------------------------------------------------------------------------------------------------------------------------------------------------------|-----------------|-----------|--------------------------------------------------------------------------------------------------|-----------------------------------------------------------------------------------------------------------------------------------------------------------------------------------------------------------------------------------------------------------------------------------------------------------------------------------------------------------------------------------------------------------------------------------------------------------------------------------------------------------------------------------------------------------------------------------------------------------------------------------------------------------------------------------------------------------------------------------------------------------------------------------------------------------------------------------------------------------------------------------------------------------------------------------------------------------------------------------------------------------------------------------------------------------------------------------------------------------------------------------------------------------------------------------------------------------------------------------------------------------------------------------------------------------------------------------------------------------------------------------------------------------------------------------------------------------------------------------------------------------------------------------------------------------------------------------------------------------------------------------------------------------------------------------|
| 20 | Castro RA, et al. Exploring the Views of Osteogenesis Imperfecta Caregivers on Internet-Based Technologies: Qualitative Descriptive Study. J Med Internet Res. 2019;21(12):e15924.                                                                                       | 2019 | Canada       | Osteogenesis Imperfecta (OI) | Exploring use of what's available online and what is needed | publicly available   | Journal article     | Multiple needs                                                                                                                              | (1) Distraction for children after surgery to promote rest and immobilization, or to distract from painful or frightening procedures etc; (2) Isolation from family or friends at a distance or in unsafe places for the child to visit; (3) Carers' self care; (4) Parents and carers feeling distressed by the disease and child's suffering; (5) Managing logistics of caregiving/ HCPs (6) Communication with HCP; (7) Facilitating care; (8) Information seeking; (9) social isolation (10) Updates on research and new treatments (11) Concern about quality, security (12) wishlist (13) caregivers desired child-friendly and age-appropriate (14) In their own language | other           |           |                                                                                                  | (1) Games, videos, audio books have a calming affect to distract from broedom, pain or fear; (2) Social media platforms like FaceTime useful for staying in touch; (3) Can be a lot of waiting for appointments and then keeping the child quiet at home after surgeries etc. Yoga apps, games and ; (4) Watching inspirational videos of other children with OI doing well gave hope; (5) Booking online much easier and e-calendars useful to store all appointments; (6) Some allowed email or messaging (e.g., to SW or PT); (7) Some tools allowed carers to find local community and care resources - e.g., wheelchair accessibility of local shopping centre etc. Appropriately adapted sports programs; (8) Found via Google so not optimal (9) Social media specifically for OI - share day-to-day care information rather than using it for specific information on prognoses or treatments. Some caregivers were more interested in answering others' questions than in having their own questions answered. OI parents were the ones who know practical day-to-day care strategies, such as where to find adaptive clothing and winter boots that would fit her child's physique. Claimed to get faster information from a social media platform group rather than an HCP. (10) Access to information; (11) Concerned about web-based predators or cyberbullies or judgement from other parents. Often were confronted with worst-case scenarios that were not applicable to their own children. (12) Web-based home fracture-splinting videos with diverse techniques for every fracture possible • Web-based videos nortravine OI patients before and after various |
| 21 | Cipriani D, Dulcan E. See and be seen: The CF community. Pediatric Pulmonology. 2017;52(Supplement 47):147-148.                                                                                                                                                          | 2017 | USA          | Cystic fibrosis              | BreatheCon                                                  | limited availability | Conference abstract | CF considered an invisible disease; social support limited by infection risk; niche information hard to find; mental health often impacted. | Lack of understanding or peers and family when the disease is "invisible." Desire to connect with people with the same disease (who "get it") but face-to-face not possible. telling your boss about CF as well as colleagues, classmates, friends, in-laws and other new family. The alienation of invisibility is compounded by uncomfortable, lonely, boring treatments. When life expectancy improves for a cohort of patients, little information about reproduction, family planning, safe pregnancies, genetic                                                                                                                                                            | social platform | Not given | Online conferences for people with CF subdivided into adults, parents/children and young people. |                                                                                                                                                                                                                                                                                                                                                                                                                                                                                                                                                                                                                                                                                                                                                                                                                                                                                                                                                                                                                                                                                                                                                                                                                                                                                                                                                                                                                                                                                                                                                                                                                                                                                   |
| 22 | Colman AW, et al. Use of Quick Response (QR) coded bracelets and cards for the improvement of cortisol deficiency/Addison's disease management: An audit of quality of care of the management of steroid deficiency in acute illness. BMJ Innovations. 2018;4(3):115-22. | 2018 | UK (England) | Addison's disease            | Quick response coded bracelet                               | Research             | Journal article     | Adrenal crisis is life-threatening and requires swift intervention but is very rare                                                         | Study of HCPs - clinically needed / useful?                                                                                                                                                                                                                                                                                                                                                                                                                                                                                                                                                                                                                                      | website passive | Not given | Bracelet has a scannable QR code that links to emergency management information                  | Clinical need identified                                                                                                                                                                                                                                                                                                                                                                                                                                                                                                                                                                                                                                                                                                                                                                                                                                                                                                                                                                                                                                                                                                                                                                                                                                                                                                                                                                                                                                                                                                                                                                                                                                                          |
| 23 | Cox NS, et al. A web-based intervention to promote physical activity in adolescents and young adults with cystic fibrosis: protocol for a randomized controlled trial. BMC polim. 2019;19(1):253.                                                                        | 2019 | Australia    | Cystic fibrosis              | ActivOnline                                                 | Research             | Journal article     | Tailored exercise program without risk of infection                                                                                         |                                                                                                                                                                                                                                                                                                                                                                                                                                                                                                                                                                                                                                                                                  | website active  | Not given | internet-based physical activity program for 12 weeks for adolescents and young adults           | Protocol                                                                                                                                                                                                                                                                                                                                                                                                                                                                                                                                                                                                                                                                                                                                                                                                                                                                                                                                                                                                                                                                                                                                                                                                                                                                                                                                                                                                                                                                                                                                                                                                                                                                          |



|    | A                                                                                                                                                                                             | B    | C         | D                           | E                                                             | F                    | G                   | H                                                                                                                                               | I                                                                                                                                                                                                                                                                                                                                                                                                                                                                                                                            | J               | K                                                    | L                                                                                                                                                                                                                                                                                                                      | M                                                                                                                                                                                                                                                                                                                                                                                                                                                                                                                                                                                                                                                                                                               |
|----|-----------------------------------------------------------------------------------------------------------------------------------------------------------------------------------------------|------|-----------|-----------------------------|---------------------------------------------------------------|----------------------|---------------------|-------------------------------------------------------------------------------------------------------------------------------------------------|------------------------------------------------------------------------------------------------------------------------------------------------------------------------------------------------------------------------------------------------------------------------------------------------------------------------------------------------------------------------------------------------------------------------------------------------------------------------------------------------------------------------------|-----------------|------------------------------------------------------|------------------------------------------------------------------------------------------------------------------------------------------------------------------------------------------------------------------------------------------------------------------------------------------------------------------------|-----------------------------------------------------------------------------------------------------------------------------------------------------------------------------------------------------------------------------------------------------------------------------------------------------------------------------------------------------------------------------------------------------------------------------------------------------------------------------------------------------------------------------------------------------------------------------------------------------------------------------------------------------------------------------------------------------------------|
| 24 | Cox NS, et al. Feasibility and acceptability of an Internet-Based program to promote physical activity in adults with cystic fibrosis. <i>Respiratory Care</i> . 2015;60(3):422-9.            | 2015 | Australia | Cystic fibrosis             | ActivOnline                                                   | Research             | Journal article     | Tailored exercise program without risk of infection                                                                                             |                                                                                                                                                                                                                                                                                                                                                                                                                                                                                                                              | website active  | Not given                                            | internet-based physical activity program for 8 weeks for adults. Also fortnightly phone consult                                                                                                                                                                                                                        | Feasible and acceptable                                                                                                                                                                                                                                                                                                                                                                                                                                                                                                                                                                                                                                                                                         |
| 25 | Cummings E, et al. Enhancing self-efficacy for self-management in people with cystic fibrosis. <i>Studies in Health Technology and Informatics</i> . 2011;169:33-37.                          | 2011 | Australia | Cystic fibrosis             |                                                               |                      |                     | Complicated self-management                                                                                                                     | Health mentoring project with 3 groups: (1) Self-efficacy web-based program + mentor via phone, (2) mentor via phone + self-efficacy program +App, (3) usual care.                                                                                                                                                                                                                                                                                                                                                           | App             | English                                              | App consisted on Symptom diary plus optional feedback on progress                                                                                                                                                                                                                                                      | Results show the intervention was generally considered to be useful and allowed CF individuals to focus on changes in symptoms. Self-efficacy increased in subjects in both intervention groups, but it is unclear from the results if the application provided additional benefits beyond supporting the mentoring intervention.                                                                                                                                                                                                                                                                                                                                                                               |
| 26 | D'Ambrosio C. Open versus closed social networking groups. <i>Haemophilia</i> . 2014;3:183.                                                                                                   | 2014 | USA       | Bleeding disorders in women | MyGirlsBlood                                                  | publicly available   | Conference abstract | Little information for this group of women; social isolation                                                                                    | Debate over whether open or closed group better. Closed for safety discussing personal details but reinforces it as a "secret" and shuts out others who may help / get it on the research agenda.                                                                                                                                                                                                                                                                                                                            | social platform | Not given                                            | Open group (not closed) on Facebook where people can ask questions or share experiences.                                                                                                                                                                                                                               | Having closed social networks are needed for groups that need privacy and security in their communications. WWBD need privacy to learn from one another and to solve intimate problems. However, when there are only closed groups, awareness ceases to exist across the larger multi-disciplinary and diverse worldwide community. Many would like to help, but would not be permitted in a closed group for WWBD.                                                                                                                                                                                                                                                                                             |
| 27 | Decker K, Meilleur C. CBDR and MyCBDR advancing hemophilia nursing practice in Canada. Conference Abstract presented at Haemophilia; May, 2018                                                | 2018 | Canada    | Haemophilia                 | MyCBDR (linked to Canadian Bleeding Disorder Registry (CBDR)) | limited availability | Conference abstract | Complicated self-management                                                                                                                     | Better outcomes from new treatment regimes but requires detailed record keeping to accurately monitor bleeding episodes, factor usage and adherence to treatment regimens.                                                                                                                                                                                                                                                                                                                                                   | App             | Not reported                                         | Links to CBDR - app allows people with a bleeding disorder to add track infusions and symptoms.Data available to all Haemophilia Treatment Centres in Canada meaning greater integration fo specialist services.                                                                                                       | Useful tool that allows access to detailed information to the care teams and by implication, better treatment outcomes                                                                                                                                                                                                                                                                                                                                                                                                                                                                                                                                                                                          |
| 28 | Fidika A, et al. A web-based psychological support program for caregivers of children with cystic fibrosis: A pilot study. <i>Health and Quality of Life Outcomes</i> . 2015;13(1)            | 2015 | Germany   | Cystic fibrosis             | WEP-CARE                                                      | Research             | Journal article     | Parents caring for a child with Cystic Fibrosis (CF) are at high risk for psychological distress and have limited access to psychological care. | Severe distress not unusual. Lack of appropriate and knowledgeable support.                                                                                                                                                                                                                                                                                                                                                                                                                                                  | website active  | Not given                                            | Web-based writing therapy - 9 sessions, tailored for the specific needs of caregivers. Written assignments that were given feedback within 48 hours. The intervention program was provided by two trained and supervised psychotherapists with expertise in psychosocial care for patients with CF and their families. | On average, the caregivers' symptoms of anxiety decreased statistically significant and clinical relevant about five points from an elevated (M=11.4; SD =2.6) to a normal level (M=6.7; SD =2.6; p < .001) between pre and post treatment. Fear of disease progression (p < .001) and symptoms of depression (p = .02) significantly decreased as well. Quality of life significantly improved (p = .01). The effects were maintained at the 3-months follow-up assessment.                                                                                                                                                                                                                                    |
| 29 | Floch J, et al. Users' Experiences of a Mobile Health Self-Management Approach for the Treatment of Cystic Fibrosis: Mixed Methods Study. <i>JMIR mHealth and uHealth</i> . 2020;8(7):e15896. | 2020 | Europe    | Cystic fibrosis             | MyCyFAPP                                                      | Research             | Journal article     | Complicated self-management                                                                                                                     | Overall positive experience but food recording was seen as too complicated. Once people met their goals, lost motivation to continue using the app. HCPs also reported that information communicated by patients is more reliable and accurate. Normally, patients do not record data systematically. They forget details or get information mixed up. Empowering patients to record events at the time they occur, HCPs felt that the data they receive are more precise and better reflect the reality of patients' status | App             | Dutch, English, Flemish, Italian, Portugese, Spanish | Food diary, nutrition follow-up (goals), symptoms diary (health diary), nutrition educational material (living with CF) and messages among other functions                                                                                                                                                             | Patients and parents had different skills, requiring follow-up by HCPs in an introductory phase. HCPs valued obtaining precise information about the patients, allowing for more personalized advice. However, the tight follow-up of several patients led to an increased workload. Over time, as patient self-efficacy increased, patient motivation for using the app decreased and the quality of the reported data was reduced. They suggest focusing on patients with poor control using the app; all patients using it for the week before a consult.Introducing all the dfeatures of the app at once can be overwhelming - staged approach better. Personalising it with help from the HCP also useful. |

|    | A                                                                                                                                                                                                                            | B    | C          | D                                     | E                                                    | F                    | G                   | H                                                                                                                         | I                                                                                                                                                                                       | J               | K            | L                                                                                                                                                                                                        | M                                                                                                                                                                                                                                                                                                                                                                                                                                                                                                                                |
|----|------------------------------------------------------------------------------------------------------------------------------------------------------------------------------------------------------------------------------|------|------------|---------------------------------------|------------------------------------------------------|----------------------|---------------------|---------------------------------------------------------------------------------------------------------------------------|-----------------------------------------------------------------------------------------------------------------------------------------------------------------------------------------|-----------------|--------------|----------------------------------------------------------------------------------------------------------------------------------------------------------------------------------------------------------|----------------------------------------------------------------------------------------------------------------------------------------------------------------------------------------------------------------------------------------------------------------------------------------------------------------------------------------------------------------------------------------------------------------------------------------------------------------------------------------------------------------------------------|
| 30 | Gow J, et al. Participation in patient support forums may put rare disease patient data at risk of re-identification. Orphanet Journal of Rare Diseases. 2020;15(1)                                                          | 2020 | UK         | Rare diseases                         | Social support groups generally for people with RD   | publicly available   | Journal article     | Vulnerable to re-identification on social support platforms                                                               | Online social support groups may not have sufficient security to prevent malicious matching of health and personal data to re-identify anonymised data                                  | social platform |              |                                                                                                                                                                                                          |                                                                                                                                                                                                                                                                                                                                                                                                                                                                                                                                  |
| 31 | Grande SW, et al. Improving care for pediatric cystic fibrosis in Sweden using a successful mHealth patient support system. Conference Abstract presented at Pediatric Pulmonology; September, 2017.                         | 2017 | Sweden     | Cystic fibrosis                       | Genia                                                | limited availability | Conference abstract | Complicated self-management/tracking symptoms and treatments                                                              | Parents don't always recall symptoms and treatments for their child making it hard for HCPs to accurately assess the patient.                                                           | App             | Not reported | Patients/parents record daily health observations and complete reports about symptoms, medications, and goals immediately prior to a clinic appointment. Data available to HCPs at the consult.          | High uptake at the study hospital; HCP took QI approach to its implementation. Considered to have improved coordination and patient-provider consensus without greater HCP burden.                                                                                                                                                                                                                                                                                                                                               |
| 32 | Guilliams JM, et al. Feasibility and usefulness of a mobile health exercise intervention in women with lymphangioleiomyomatosis. Conference Abstract presented at Cardiopulmonary Physical Therapy Journal; July, 2021.      | 2021 | Not given  | Lymphangioleiomyomatosis (LAM)        | Home based exercise program for women with LAM       | Research             | Conference abstract | Require tailored exercise program                                                                                         | Patients have reduced lung function and exercise tolerance; and a recent report indicates lower physical activity levels in LAM compared to patients with COPD and healthy populations. | App             | Not reported | App on smartphone with interfacing wearable and home monitoring devices. Check in with Physio weekly.                                                                                                    | 12 wk trial. Initial findings indicate feasibility and usefulness of an mHealth home exercise program for LAM, including good patient adherence and satisfaction with the program.                                                                                                                                                                                                                                                                                                                                               |
| 33 | Haik D, et al. The Online Support Group as a Community: A Thematic Content Analysis of an Online Support Group for Idiopathic Subglottic Stenosis. Annals of Otolaryngology, Rhinology and Laryngology. 2019;128(4):293-299. | 2019 | USA        | Idiopathic subglottic stenosis (iSGS) | Living With Idiopathic Subglottic Stenosis (LwiSGS), | publicly available   | Conference abstract | Access to information, sharing of experiences                                                                             |                                                                                                                                                                                         | social platform | Not given    | Online community specifically for people with iSGS                                                                                                                                                       | Analysis demonstrated that communications primarily encompassed three major thematic elements: (1) information sharing; (2) emotional support, expression, and experience sharing; and (3) community building. Positively toned posts grossly overshadowed negatively toned posts by almost a factor of 3. A significant portion of group members requested information from their peers, suggesting a high level of trust toward the resources provided in this group, even those involving a surgical procedure or medication. |
| 34 | Ho G, et al. Metabolic Diet App Suite for inborn errors of amino acid metabolism. Molecular Genetics and Metabolism. 2016;117(3):322-327.                                                                                    | 2016 | Canada     | Inborn errors of metabolism (IEM)     | Metabolic DietAppSuite                               | publicly available   | Journal article     | Burden of daily adherence to complex and time-consuming medical diet to attain metabolic control and prevent organ damage | Diet is only one of a number of competing priorities for people with IEM, but one of the most onerous. Poor nutritional labelling on many foods - restricts diet further.               | App             | Not reported | Online tool for mobile phones and desktops for 15 different IEMs. Creates a personalised dashboard including specific nutrient goals. Food diary, nutrient counts and able to add your homemade recipes. |                                                                                                                                                                                                                                                                                                                                                                                                                                                                                                                                  |
| 35 | Howard S, The All Wales Adult Cystic Fibrosis Centre (AWACFC) Virtual Instruction of Exercise with Technology to Enhance Care-VIEWTEC Programme. Journal of Cystic Fibrosis. 2014;2:520                                      | 2014 | UK (Wales) | Cystic fibrosis                       | VIEWTEC Programme                                    | Research             | Conference abstract | Patients live 2 and 3 hours away from treatment centre but benefit from tailored exercise programs                        | Group exercise is more motivating                                                                                                                                                       | telehealth      | Not given    | virtual exercise sessions with a CF Gym Instructor. Email invitations and delivered via Cisco Webex                                                                                                      | Feasible and patients liked it.                                                                                                                                                                                                                                                                                                                                                                                                                                                                                                  |

|    | A                                                                                                                                                                                                                                                                                           | B    | C               | D                                        | E                                                   | F                  | G                   | H                                                                                                                           | I                                                                                                                                                  | J               | K                                                 | L                                                                                                                                                                                                                                                                                                                                                                                                                      | M                                                                                                                                                                                                                                                                                                                            |
|----|---------------------------------------------------------------------------------------------------------------------------------------------------------------------------------------------------------------------------------------------------------------------------------------------|------|-----------------|------------------------------------------|-----------------------------------------------------|--------------------|---------------------|-----------------------------------------------------------------------------------------------------------------------------|----------------------------------------------------------------------------------------------------------------------------------------------------|-----------------|---------------------------------------------------|------------------------------------------------------------------------------------------------------------------------------------------------------------------------------------------------------------------------------------------------------------------------------------------------------------------------------------------------------------------------------------------------------------------------|------------------------------------------------------------------------------------------------------------------------------------------------------------------------------------------------------------------------------------------------------------------------------------------------------------------------------|
| 36 | Huang X, et al. Developing and evaluating HE-APP: Acceptability and usability of a smartphone APP system to improve self-management in Chinese patients with hemophilia. Conference Abstract presented at Haemophilia; June, 2020                                                           | 2020 | China           | Haemophilia                              | HE-APP                                              |                    | Conference abstract | Complicated self-management linked to outcomes                                                                              | Outcomes linked to self management and accurate symptom-tracking.                                                                                  | App             | Mandarin?                                         | (1) recording of bleeding symptoms; (2) monitoring of treatment adherence; (3) education, training and support system; (4) accounting and analysing the use of the medicine; and (5) recording the economic cost.                                                                                                                                                                                                      | Acceptability and susability levels high among patients and their parents. Small trial with 10 patients.                                                                                                                                                                                                                     |
| 37 | Ingravallo F, et al. Telemedicine with mobile internet devices for innovative multidisciplinary patientcentred care of patients with narcolepsy. Protocol of the randomized controlled trial TENAR (TElemedicine for NARcolepsy). European Journal of Neurology. 2020;27(Supplement 1):516. | 2020 | Italy           | Narcolepsy                               | TENAR trial (Protocol)                              | Research           | Conference abstract | disease burden is increased by the need for traveling for medical consultations, with high costs for patients and families. |                                                                                                                                                    | telehealth      |                                                   |                                                                                                                                                                                                                                                                                                                                                                                                                        |                                                                                                                                                                                                                                                                                                                              |
| 38 | Kauw D, et al. The Contribution of Online Peer-to-Peer Communication Among Patients With Adrenal Disease to Patient-Centered Care. J Med Internet Res. 2015;17(3):e54.                                                                                                                      | 2015 | The Netherlands | Addison's disease and Cushing's syndrome | online forum moderated by the Dutch Adrenal Society | publicly available | Journal article     | Peer-to-peer information sharing                                                                                            |                                                                                                                                                    | social platform | Not given                                         | Public area and password prtected area. Rules for posting e.g., posting medical information - must provide references. Moderated by vounteers.                                                                                                                                                                                                                                                                         | Analysis of content: 81% asking for more info about the disease; 10% asking for emotional support; Answers mostly practical tips and sharing own experiences. Seen as an important information source. Social support in the form of experiential info and emotional support - not able to be obtained from HCPs.            |
| 39 | Khair K, et al. Social networking for adolescents with haemophilia. Haemophilia. 2011;17(2):369.                                                                                                                                                                                            | 2011 | UK              | Haemophilia                              | VivaSix                                             | Research           | Conference abstract | Adherence to treatment difficult for adolescent boys with severe haemophilia                                                | Parents are offtensole source of information outside of HCPs. Few know of other boys with haemophilia                                              | social platform | Not given                                         | Restricted social network for boys 11-18 years with severe haemophilia. Will include games and other features to promote sharing of self management skills.                                                                                                                                                                                                                                                            |                                                                                                                                                                                                                                                                                                                              |
| 40 | Khair K, et al. The role of social networking in haemophilia management. Haemophilia. 2010;4):129-130.                                                                                                                                                                                      | 2010 | UK              | Haemophilia                              | hiFive                                              | Research           | Conference abstract | Adherence to treatment difficult for adolescent boys with severe haemophilia                                                | Parental influence lessens. Potential for peer to peer transmission of self management skills                                                      | social platform | Not given                                         | hiFive - small group for 11-19 year olds living with severe haemophilia. Closed to parents.                                                                                                                                                                                                                                                                                                                            |                                                                                                                                                                                                                                                                                                                              |
| 41 | Kirk S, Milnes L. An exploration of how young people and parents use online support in the context of living with cystic fibrosis. Health expectations. 2016;19(2):309-321.                                                                                                                 | 2016 | UK              | Cystic fibrosis                          | Online forum for people with CF                     | Research           | Journal article     | Can be hard to find information and support for people with a rare disease or caring for a child with a rare disease        |                                                                                                                                                    | social platform | Not given                                         | Participants exchanged experientially derived advice and views on how to manage treatments, emotions, relationships, identity and support from services. While parents sought information and support on managing specific therapies/services and ways of maintaining their child's health, the information and support young people desired appeared to be more directed at how to 'fit' CF into their everyday lives | Online support groups appear to supplement professional support in relation to self-management. They enable young people and parents to share experiences, feelings and strategies for living with long-term conditions with peers and develop the expertise to empower them in interactions with health-care professionals. |
| 42 | Kühnte L, et al. Development of a Social Network for People Without a Diagnosis (RarePairs): Evaluation Study. J Med Internet Res. 2020;22(9):e21849                                                                                                                                        | 2020 | Germany         | Undiagnosed rare diseases                | RarePairs                                           | Research           | Journal article     | Diagnostic delay is a regular feature of rare diseases                                                                      | Diagnosis can be difficult with limited infromation and experience of rare diseases. This uses information from a database of 973 diagnosed people | social platform | German, English, Chinese, Portuguese, and Finnish | Social network platform with built in algorithm to match individuals with similar disease burden in the lead up to diagnosis.                                                                                                                                                                                                                                                                                          |                                                                                                                                                                                                                                                                                                                              |

|    | A                                                                                                                                                                                             | B    | C            | D                                  | E                                                                     | F                    | G                   | H                                                                                                      | I                                                                                                                                                                   | J               | K               | L                                                                                                                                                                                                                                                                                                                                                                                                                                  | M                                                                                                                                                      |
|----|-----------------------------------------------------------------------------------------------------------------------------------------------------------------------------------------------|------|--------------|------------------------------------|-----------------------------------------------------------------------|----------------------|---------------------|--------------------------------------------------------------------------------------------------------|---------------------------------------------------------------------------------------------------------------------------------------------------------------------|-----------------|-----------------|------------------------------------------------------------------------------------------------------------------------------------------------------------------------------------------------------------------------------------------------------------------------------------------------------------------------------------------------------------------------------------------------------------------------------------|--------------------------------------------------------------------------------------------------------------------------------------------------------|
| 43 | Lassandro G, et al. EMO.TI.ON.: Technologies for the safety of children with hemophilia. Blood Transfusion; November 2017. p. s539.                                                           | 2017 | Italy        | Haemophilia                        | EMO.TI.ON. system                                                     | Research             | Conference abstract | Home care decreasing reliance on hospital                                                              | Diagnosing suspected bleeds into joints requiring hospital visit for diagnosis                                                                                      | telehealth      | Not given       | an ultrasound diagnostic solution using at home by parents or caregivers. Moreover, the system can transfer, live, images by world wide web to specialist physician creating a network. The solution will be achieved by attending the design related to familiarization processes. Other function of the system are: teleconsulting tools, semantic scientific search, recording data (i.e. clinical chart, infusional diary...). | Ongoing trial but results of parent use comparable to HCP use.                                                                                         |
| 44 | Lee Yeong J, et al. A Newly Developed Web-Based Resource on Genetic Eye Disorders for Users With Visual Impairment (Gene.Vision): Usability Study. J Med Internet Res. 2021;23(1):e19151.     | 2021 | UK (England) | Genetic eye disorders              | Gene.Vision                                                           | Research             | Journal article     | Educational web-based materials need to be accessible by people with low vision                        |                                                                                                                                                                     | website passive | Not given       | Gene.vision web site on genetic eye disorders optimised for people with vision problems                                                                                                                                                                                                                                                                                                                                            |                                                                                                                                                        |
| 45 | Lewis T. Improving quality of life in patients with cystic fibrosis with exercise: CF foundation impact grant update. Conference Abstract presented at Pediatric Pulmonology; October, 2019.  | 2019 | USA          | Cystic fibrosis                    | Exercise program via App                                              | Research             | Conference abstract | Require tailored exercise program in isolation                                                         | Deliver an at home exercise program to people with CF - indirect supervision by exercise physiologist.                                                              | App             | English         | Guided exercise program (3 levels to choose from) and assessment tasks. Supported by live recorded discussions and Q and A sessions.                                                                                                                                                                                                                                                                                               | Suggests it is feasible and could lead to improvements in QoL                                                                                          |
| 46 | Lomotey RK, et al. Mobile self-management guide for young men with mild hemophilia in cases of minor injuries. Network Modeling Analysis in Health Informatics and Bioinformatics. 2014;3(1). | 2014 | Canada       | Haemophilia                        | Hemophilia Injury Recognition Tool ("HIRT?")                          | limited availability | Journal article     | Patients may be slow to recognise injuries if their disease is mild                                    | People with mild haemophilia may only experience bleeds after a significant injury and so not recognise sequelae of milder events - not seek appropriate treatment. | App             | English, French | Structured assessment of suspected bleeds plus appropriate first-aid if needed. If more help required, phone number of all Haemophilia Treatment Centres in Canada are given to enquire about further management.                                                                                                                                                                                                                  | High usability for all users whether tech savvy or not.                                                                                                |
| 47 | Manu-Pereira MM, et al. ENERCA: Towards a European Reference Network (ERN) in rare haematological diseases. British Journal of Haematology. 2016;173(Supplement 1):39-40.                     | 2016 | Europe       | Rare and Congenital Anaemias       | e-ENERCA (European Network for Rare and Congenital Anaemias (ENERCA)) | Research             | Conference abstract | Distance from specialist centres, lack of relevant information and need to share data with expert HCP. | European reference Networks - hub and spoke model for rare disease care                                                                                             | website active  | Not given       | 3 separate platforms linked to the e-ENERCA website 1) e-Registry, a Pan European registry of RAs for epidemiological surveillance 2) e-Learning for the dissemination of knowledge, continuous medical education, and best practices awareness, and 3) Telemedicine, a platform to provide expertise, at distance, for complex cases.                                                                                             |                                                                                                                                                        |
| 48 | Moon H, Moon J. Comparative readability analysis of information on exercise for hemophilia patients. Haemophilia. 2021;27(SUPPL 2):57.                                                        | 2021 | South Korea  | Haemophilia                        | Existing online exercise programs for Haemophilia                     | publicly available   | Conference abstract | Tailored online exercise programs need to be understandable.                                           | Readability and other access features not always present                                                                                                            | website passive | Not given       | Existing web-based resources                                                                                                                                                                                                                                                                                                                                                                                                       | Sites had higher than recommended readability scores and came low down in search algorithm rankings making them hard to find.                          |
| 49 | Naik H, et al. Experience with a pilot skype internet support group for symptomatic patients with acute intermittent porphyria. Clinical Chemistry and Laboratory Medicine. 2013;51(5):eA10.  | 2013 | USA          | Acute Intermittent Porphyria (AIP) | Skype support group mediated by HCPs                                  | Research             | Conference abstract | Psychosocial and emotional isolation leading to poor mental health in this group                       | Life-threatening acute episodes - painful with sequelae - chronic symptoms. Poorly understood psychosocial needs.                                                   | social platform | Not given       | Skype support group mediated by a porphyria expert physician, and the genetic counselor/coordinator of the porphyria clinic and an available psychologist with 4 women with AIP.                                                                                                                                                                                                                                                   | Participants reported that this was a very comforting experience, reducing the feeling of isolation and increasing their understanding of the disease. |

|    | A                                                                                                                                                                                                                                                       | B    | C       | D                                                                            | E                                                                                                                                        | F                    | G                   | H                                                                                                                                                                               | I                                                                                                                                                                                                                                                                                                                                                                                                                                                                                                                  | J              | K                           | L                                                                                                                                                                                                                                                                                                                                                                                                                                                                                                                                                                                       | M                                                                                                  |
|----|---------------------------------------------------------------------------------------------------------------------------------------------------------------------------------------------------------------------------------------------------------|------|---------|------------------------------------------------------------------------------|------------------------------------------------------------------------------------------------------------------------------------------|----------------------|---------------------|---------------------------------------------------------------------------------------------------------------------------------------------------------------------------------|--------------------------------------------------------------------------------------------------------------------------------------------------------------------------------------------------------------------------------------------------------------------------------------------------------------------------------------------------------------------------------------------------------------------------------------------------------------------------------------------------------------------|----------------|-----------------------------|-----------------------------------------------------------------------------------------------------------------------------------------------------------------------------------------------------------------------------------------------------------------------------------------------------------------------------------------------------------------------------------------------------------------------------------------------------------------------------------------------------------------------------------------------------------------------------------------|----------------------------------------------------------------------------------------------------|
| 50 | Nicholl H, et al. Internet Use by Parents of Children With Rare Conditions: Findings From a Study on Parents' Web Information Needs. <i>J Med Internet Res.</i> 2017;19(2):e51.                                                                         | 2017 | Ireland | Rare diseases                                                                | Hypothetical                                                                                                                             | publicly available   | Journal article     | Recommendations for a consumer facing website                                                                                                                                   | <ul style="list-style-type: none"> <li>The content needs to be relevant, accurate, trustworthy, and up to date.</li> <li>The topics most frequently searched for (Table 5) need to be addressed.</li> <li>It should contain a Web-based forum or a social network component.</li> <li>The website should be integrated with social media and be mobile friendly.</li> </ul>                                                                                                                                        | other          |                             |                                                                                                                                                                                                                                                                                                                                                                                                                                                                                                                                                                                         |                                                                                                    |
| 51 | Nilson J, et al. Are you HIRT? (Hemophilia Injury Recognition Tool): Perceptions of the mobile app on injury self-management from young men with mild hemophilia in Canada. Conference Abstract presented at Haemophilia; July, 2016.                   | 2016 | Canada  | Haemophilia                                                                  | Hemophilia Injury Recognition Tool ("HIRT?")                                                                                             | limited availability | Conference abstract | Patients may be slow to recognise injuries if their disease is mild                                                                                                             | People with mild haemophilia may only experience bleeds after a significant injury and so not recognise sequelae of milder events - not seek appropriate treatment.                                                                                                                                                                                                                                                                                                                                                | App            | English, French             | Structured assessment of suspected bleeds plus appropriate first-aid if needed. If more help required, phone number of all Haemophilia Treatment Centres in Canada are given to enquire about further management.                                                                                                                                                                                                                                                                                                                                                                       | Increased confidence dealing with injuries but no change in self management                        |
| 52 | Osara Y, et al. Development of newborn screening connect (NBS connect): a self-reported patient registry and its role in improvement of care for patients with inherited metabolic disorders. <i>Orphanet Journal Of Rare Diseases.</i> 2017;12(1):132. | 2017 | USA     | Phenylketonuria (PKU), maple syrup urine disease (MSUD) or tyrosinemia (TYR) | Newborn Screening Connect (NBS Connect)                                                                                                  |                      | Journal article     | Patients/carers isolated by rareness of disease.                                                                                                                                | Linking patients/carers with information. Registries are generating useful data and contributing to the research agenda.                                                                                                                                                                                                                                                                                                                                                                                           | website active | Not given                   | Registry - patient initiated and enters data. Resources such as education materials, information on the latest research and clinical trials, recipes, interactive health tracking systems, and professional support tools                                                                                                                                                                                                                                                                                                                                                               |                                                                                                    |
| 53 | Paglialonga A, et al. eHealth for patients with rare diseases: the eHealth Working Group of the European Reference Network on Rare Multisystemic Vascular Diseases (VASCERN). <i>Orphanet Journal of Rare Diseases.</i> 2021;16(1):164.                 | 2021 | Europe  | Rare Multisystemic Vascular Diseases                                         | Mobile app developed by VASCERN (European Reference Network on Rare Multisystemic Vascular Diseases); Pills of Knowledge YouTube channel | limited availability | Journal article     | (1) Finding a suitable expert; (2) finding a patient support agency; (3) need for timely info about the patient in an emergency situation; (4) information needs of the patient | (1) In Europe can mean travelling across borders, languages - incurring time and money. Difficult to find appropriate RD expert. This RD is multisystem so may need several specialists; (2) Not always named after your disease / group of diseases (3) Paper records carried by the patient are common but may be lost and can only contain a limited amount of information; (4) High quality and easy to understand - combining patient and carer needs, HCP expertise and patient advocacy agency perspectives | App            | Multiple European languages | However, further research is needed as digital patient passports may also pose new challenges, for example in terms of data management, patient privacy, informed consent, and control of shared data. In addition, digital passports may not necessarily fit the needs of every patient with the disease as, for example, people with limited digital skills and people not willing to use a smartphone to handle clinical issues might still prefer to use conventional paper documents. Issues about confidentiality and ethical rules in various EU countries, remain to be solved. |                                                                                                    |
| 54 | Parrott H, et al. A digital solution for virtual consultation and sharing health data in adults with cystic fibrosis. <i>Journal of Cystic Fibrosis.</i> 2019;18(Supplement 1):S51                                                                      | 2019 | UK      | Cystic fibrosis                                                              | Virtual consults and remote monitoring                                                                                                   | Research             | Conference abstract | Frequent clinic visits are having a huge impact on the quality of life.                                                                                                         | Also growing cohort of patients as they are living longer - concerns about Health system capacity                                                                                                                                                                                                                                                                                                                                                                                                                  | telehealth     | Not given                   | Virtual clinics and spirometry done by patients at home                                                                                                                                                                                                                                                                                                                                                                                                                                                                                                                                 | Considerable savings of time for both patients and clinicians. So far no issues. Patients like it. |
| 55 | Polineni D, et al. A stakeholder-informed feasibility study of tele-coaching to improve treatment adherence in patients with cystic fibrosis. <i>Pediatric Pulmonology.</i> 2017;52(Supplement 47):479.                                                 | 2017 | USA     | Cystic fibrosis                                                              | Tele-coaching                                                                                                                            | Research             | Conference abstract | Adherence to treatment not optimal                                                                                                                                              | Proposed intervention= tele-coaching                                                                                                                                                                                                                                                                                                                                                                                                                                                                               | telehealth     |                             |                                                                                                                                                                                                                                                                                                                                                                                                                                                                                                                                                                                         |                                                                                                    |

1  
2  
3  
4  
5  
6  
7  
8  
9  
10  
11  
12  
13  
14  
15  
16  
17  
18  
19  
20  
21  
22  
23  
24  
25  
26  
27  
28  
29  
30  
31  
32  
33  
34  
35  
36  
37  
38  
39  
40  
41  
42  
43  
44  
45  
46

|    | A                                                                                                                                                                                                                                          | B    | C                    | D                                | E                                               | F                  | G                   | H                                                                                        | I                                                                                                                                                                                                                                                                                           | J               | K            | L                                                                                                                                                                                                                         | M                                                                                                                                                                                                                                                                                                                                                                                                                                                                                                                                                                                                                                                                                                                                                                                                                                                                                                                                                                                                                                                                                      |
|----|--------------------------------------------------------------------------------------------------------------------------------------------------------------------------------------------------------------------------------------------|------|----------------------|----------------------------------|-------------------------------------------------|--------------------|---------------------|------------------------------------------------------------------------------------------|---------------------------------------------------------------------------------------------------------------------------------------------------------------------------------------------------------------------------------------------------------------------------------------------|-----------------|--------------|---------------------------------------------------------------------------------------------------------------------------------------------------------------------------------------------------------------------------|----------------------------------------------------------------------------------------------------------------------------------------------------------------------------------------------------------------------------------------------------------------------------------------------------------------------------------------------------------------------------------------------------------------------------------------------------------------------------------------------------------------------------------------------------------------------------------------------------------------------------------------------------------------------------------------------------------------------------------------------------------------------------------------------------------------------------------------------------------------------------------------------------------------------------------------------------------------------------------------------------------------------------------------------------------------------------------------|
| 56 | Richesson RL, et al. An automated communication system in a contact registry for persons with rare diseases: Scalable tools for identifying and recruiting clinical research participants. Contemporary Clinical Trials. 2009;30(1):55-62. | 2009 | USA                  | Rare diseases                    | Notifications of relevant new research projects | Research           | Journal article     | Patients have a lack of access to new trials; Researchers - hard to recruit patients     | All related to rarity of the conditions                                                                                                                                                                                                                                                     | website passive | Not given    | web-based automated system generates periodic and customized communications to notify registrants of relevant studies in the NIH Rare Diseases Clinical Research Network (RDCRN).                                         |                                                                                                                                                                                                                                                                                                                                                                                                                                                                                                                                                                                                                                                                                                                                                                                                                                                                                                                                                                                                                                                                                        |
| 57 | Rits S, et al. Weekly patient webcasts: An adult CF center's response to the COVID-19 pandemic. Conference Abstract presented at Pediatric Pulmonology; October, 2020.                                                                     | 2020 | USA                  | Cystic fibrosis                  | Webcasts on COVID                               | publicly available | Conference abstract | Urgent need for disease specific information during COVID pandemic                       | Plenty of information for the general public but not for people with a rare disease. Concerns from people with CF adequate infection control, access to care, medications and supplies, clinical outcomes as they relate to CF, employment status and disability, and overall mental health | other           | Not given    | Weekly webcasts on COVID made available Could ask questions through Google form. Email notification out to patients and carers.                                                                                           |                                                                                                                                                                                                                                                                                                                                                                                                                                                                                                                                                                                                                                                                                                                                                                                                                                                                                                                                                                                                                                                                                        |
| 58 | Rodman J, et al. Patient perspectives on electronic access to registry health records: An Irish-Slovene online survey. Journal of Cystic Fibrosis. 2016;15(Supplement 1):S36.                                                              | 2016 | Ireland and Slovenia | Cystic fibrosis                  | European CF Registry                            | Research           | Conference abstract | Lack of patient access to their own medical records                                      | Thought to be useful for self management                                                                                                                                                                                                                                                    | website active  | Not given    | Hypothetical access to the Register                                                                                                                                                                                       | Patients in favour of it but concerned about security                                                                                                                                                                                                                                                                                                                                                                                                                                                                                                                                                                                                                                                                                                                                                                                                                                                                                                                                                                                                                                  |
| 59 | Rudolf I, et al. Assessment of a Mobile App by Adolescents and Young Adults With Cystic Fibrosis: Pilot Evaluation. JMIR mHealth and uHealth. 2019;7(11):e12442.                                                                           | 2019 | Germany              | Cystic fibrosis                  | Kinderhilfe Organtransplantation (KIOAPP)       | publicly available | Journal article     | Lung function decline in transition from 12 and 24 years.                                | Improving self management and independence from parents important for ongoing outcomes. Poor self management only slowly manifests itself.                                                                                                                                                  | App             | ?German      | App contains a diary function for recording vital signs and personal observations, communication platform for sending information to the HCP, a medication plan, and medication reminder function. Age appropriate format | Perceived as useful and supportive overall. Most useful feature was the medication plan and reminders. Diary use became less frequent quickly at odds with its high usefulness rating.                                                                                                                                                                                                                                                                                                                                                                                                                                                                                                                                                                                                                                                                                                                                                                                                                                                                                                 |
| 60 | Ruther DF, et al. Mobile app requirements for patients with rare liver diseases: A single center survey for the ERN RARE-LIVER. Clinics and Research in Hepatology and Gastroenterology. 2021;45(6).                                       | 2021 | Europe               | autoimmune liver diseases (AILD) | Hypothetical                                    | Research           | Journal article     | Research into what consumers want in a Rare Liver disorder app                           |                                                                                                                                                                                                                                                                                             | App             | Not reported | Hypothetical                                                                                                                                                                                                              | A substantial majority of patients expected to benefit from the app due to constant access to health data (81%), better overview of the course of the disease (80%), better understanding of the disease (70%) and faster detection of drug side effects (64%). only the minority of patients believed that an app could help to improve quality of life (21%), reduce fears associated with the disease (24%), reduce mistakes in taking medication (32%) or improve medication adherence (37%) (Fig. 3). Significantly desired features were information on new developments (93%), access to one's own medical records (89%), notifications to practitioner in case of concerns (84%), automatic ordering of follow-up prescriptions (81%), information on clinical trials (79%), disease information (79%) and recording of health concerns with symptom trackers (73%). In contrast, significantly undesired features were gamification or reward system (5%), networking (27%) and comparisons (35%) with other persons affected (Fig. 3). Did not all match with HCP responses. |
| 61 | Sottilotto G, et al. The HEMONLINE project: Preliminary results. Haemophilia. 2012;3:77.                                                                                                                                                   | 2012 | Italy                | Haemophilia                      | HEMONLINE                                       | Research           | Conference abstract | Distance to treatment centre burdensome and results in expenses including loss of wages. |                                                                                                                                                                                                                                                                                             | telehealth      | Not given    | Web-cam and internet connection provided to patients to allow them to contact HCPs in addition to in person home visits by the MDT                                                                                        | In progress but suggests better use of health services and patient satisfaction                                                                                                                                                                                                                                                                                                                                                                                                                                                                                                                                                                                                                                                                                                                                                                                                                                                                                                                                                                                                        |

|    | A                                                                                                                                                                                                                                                                                  | B    | C                   | D                                     | E                                      | F                    | G                   | H                                                                                                                                    | I                                                                                                                                                                                                                                                                                                                                    | J               | K                 | L                                                                                                                                                                                                                                                                                                                                                                 | M                                                             |
|----|------------------------------------------------------------------------------------------------------------------------------------------------------------------------------------------------------------------------------------------------------------------------------------|------|---------------------|---------------------------------------|----------------------------------------|----------------------|---------------------|--------------------------------------------------------------------------------------------------------------------------------------|--------------------------------------------------------------------------------------------------------------------------------------------------------------------------------------------------------------------------------------------------------------------------------------------------------------------------------------|-----------------|-------------------|-------------------------------------------------------------------------------------------------------------------------------------------------------------------------------------------------------------------------------------------------------------------------------------------------------------------------------------------------------------------|---------------------------------------------------------------|
| 62 | Stevenson Won A, et al. Assessing the Feasibility of an Open-Source Virtual Reality Mirror Visual Feedback Module for Complex Regional Pain Syndrome: Pilot Usability Study. J Med Internet Res. 2021;23(5):e16536.                                                                | 2021 | USA                 | Complex regional pain syndrome (CRPS) | Virtual Reality Visual Feedback Module | Research             | Journal article     | Few treatment options for CRPS.                                                                                                      | Mirror visual feedback therapies promising. Can be delivered using VR but costly and not so far popular. Now cheaper and HCPs developing skills to deliver it                                                                                                                                                                        | Website active  | Not reported      | HCP led VR sessions in a clinic with a view to extending it to home use. Provides therapy platform and information.                                                                                                                                                                                                                                               | Did not improve pain but usability, feasibility and all good. |
| 63 | Storf H,et al. Vision and challenges of a cartographic representation of expert medical centres for rare diseases. Studies in health technology and informatics. 2014;205:677-81.                                                                                                  | 2014 | Germany             | Rare diseases                         | se-atlas                               | Research             | Journal article     | Difficult for people with rare diseases to find appropriate specialist centre in Germany                                             |                                                                                                                                                                                                                                                                                                                                      | website active  | Not given         | Interactive map and list                                                                                                                                                                                                                                                                                                                                          |                                                               |
| 64 | Timmer AM, et al. A Blended Physiotherapy Intervention for Persons With Hemophilic Arthropathy: Development Study. J Med Internet Res. 2020;22(6):e16631.                                                                                                                          | 2020 | Netherlands         | Haemophilia                           | e-Exercise HA                          | Research             | Journal article     | Few PTs understand haemophilic arthropathy and so access to one is difficult for this common complication; Cost of specialist physio | most critical barriers to adhering to physiotherapy were the limited reimbursement by the health insurance, execution of boring exercises, and stubbornness of the patients to accept advice. The patients mentioned that a good relationship with their physiotherapist facilitated their adherence to the physiotherapy treatment. | website active  | Not given         | A 12-week blended intervention was developed, integrating face-to-face physiotherapy sessions with a web-based app.The intervention consists of information modules for persons with HA and information modules for physiotherapists, a graded activity program using a self-chosen activity, and personalized video-supported exercises. The information modules |                                                               |
| 65 | Verkleij M, et al. Development and evaluation of an internet-based cognitive behavioral therapy intervention for anxiety and depression in adults with cystic fibrosis (eHealth CF-CBT): An international collaboration. Internet Interventions. 2021;24.                          | 2021 | Netherlands         | Cystic fibrosis                       | eHealth CF-CBT                         | Research             | Journal article     | Anxiety and depression in people with CF common and can affect adherence, health and QoL                                             | Access to evidence-based mental health care can be limited adding to the cost and burden of care for people with CF.                                                                                                                                                                                                                 | website active  | English and Dutch | Internet delivered CBT sessions guided bya therapist. Trialled with 16 people with CF                                                                                                                                                                                                                                                                             | high levels of acceptability and usability                    |
| 66 | Verkleij M, et al. Development of a therapist-guided internet-delivered cognitive behavioral therapy intervention for anxiety and depression in adults with cystic fibrosis (e-Health CF-CBT): An international collaboration. Pediatric Pulmonology. 2019;54(Supplement 2):406-7. | 2019 | Netherlands         | Cystic fibrosis                       | eHealth CF-CBT                         | Research             | Conference abstract | Anxiety and depression in people with CF common and can affect adherence, health and QoL                                             | Access to evidence-based mental health care can be limited adding to the cost and burden of care for people with CF.                                                                                                                                                                                                                 | website active  | English and Dutch | Pilot Internet delivered CBT sessions guided by a therapist                                                                                                                                                                                                                                                                                                       |                                                               |
| 67 | Verkleij M,et al. Development and evaluation of an internet-based cognitive behavioral therapy intervention for anxiety and depression in adults with cystic fibrosis: An international collaboration. Pediatric Pulmonology. 2020;55(SUPPL 2):267.                                | 2020 | Netherlands         | Cystic fibrosis                       | eHealth CF-CBT                         | Research             | Conference abstract | Anxiety and depression in people with CF common and can affect adherence, health and QoL                                             | Access to evidence-based mental health care can be limited adding to the cost and burden of care for people with CF.                                                                                                                                                                                                                 | website active  | English and Dutch | Internet delivered CBT sessions guided bya therapist. Trialled with 16 people with CF                                                                                                                                                                                                                                                                             | High levels of acceptability and usability                    |
| 68 | Wagner B,et al. Establishing an online physical exercise program for people with hemophilia. Wiener Klinische Wochenschrift. 2019;131(21-22):558-66.                                                                                                                               | 2019 | Germany and Austria | Haemophilia                           | online exercise program                | limited availability | Journal article     | Distance to attend exercise program at the specialist centre not feasible                                                            |                                                                                                                                                                                                                                                                                                                                      | website passive | Not given         | Online exercise lessons for adults and young people conducted by physician. Also have consultation hours (? Online) when you can speak to someone at the clinic about the program)                                                                                                                                                                                |                                                               |



|    | A                                                                                                                                                                                                                                | B    | C         | D                              | E                                                       | F                  | G               | H                                                                                         | I                                                                          | J               | K            | L                                                                                                                                                                                                                    | M                                                                                                                                                                                                                                                                                                                                                                                                                                                                                                                                                                                       |
|----|----------------------------------------------------------------------------------------------------------------------------------------------------------------------------------------------------------------------------------|------|-----------|--------------------------------|---------------------------------------------------------|--------------------|-----------------|-------------------------------------------------------------------------------------------|----------------------------------------------------------------------------|-----------------|--------------|----------------------------------------------------------------------------------------------------------------------------------------------------------------------------------------------------------------------|-----------------------------------------------------------------------------------------------------------------------------------------------------------------------------------------------------------------------------------------------------------------------------------------------------------------------------------------------------------------------------------------------------------------------------------------------------------------------------------------------------------------------------------------------------------------------------------------|
| 69 | Walker KK. Cognitive and affective uses of a Thoracic Outlet Syndrome Facebook support group. 2014                                                                                                                               | 2014 | USA       | Thoracic Outlet Syndrome (TOS) | Thoracic Outlet Syndrome (TOS) Awareness Facebook group | publicly available | Journal article | Finding reliable information difficult for people with a rare disease                     | HCPs may not be knowledgeable. Support from peers difficult due to rarity. | social platform | Not given    | Facebook group for people with TOS                                                                                                                                                                                   | Analysis of cognitive needs indicated TOS patients used the site more to share information about their own TOS symptoms and journey with diagnosis than to seek information. Analysis of affective needs found patients were more likely to use the site to give support and encouragement to others than to express concerns and complaints. The complaints they did express were primarily related to their frustration with the general medical community's perceived inability to diagnose and understand their disease or to question a specific doctor's diagnosis/recommendation |
| 70 | Wittmeier K, et al. Analysis of a Parent-Initiated Social Media Campaign for Hirschsprung's Disease. J Med Internet Res. 2014;16(12):e288.                                                                                       | 2014 | Canada    | Hirschsprung's Disease         | Social media campaign "Shit happens"                    | publicly available | Journal article | Families of children with rare diseases can feel isolated and unsupported                 |                                                                            | social platform | English      | Social media campaign to raise awareness and provide support for families dealing with Hirschsprung's disease. Facebook, Twitter, Blog posts and question and answer style postings. Very engaging for the community | Analytics showed 5400 views of the blog from 37 countries. Across platforms - within 2 hours of posting a question could get 143 views, 20 responses increasing to 30 responses within 5 hours.                                                                                                                                                                                                                                                                                                                                                                                         |
| 71 | Wood J, et al. A smartphone application for reporting symptoms in adults with cystic fibrosis improves the detection of exacerbations: Results of a randomised controlled trial. Journal of Cystic Fibrosis. 2020;19(2):271-276. | 2020 | Australia | Cystic fibrosis                | Not given                                               | Research           | Journal article | Delayed reporting of symptoms can result in more severe exacerbations and worse outcomes. |                                                                            | App             | Not reported | 12 questions re symptoms associated with exacerbation that alert a nurse if respondents answer yes.                                                                                                                  | No change in IV antibiotic use. Number of courses of oral antibiotics increased and the median (IQR) time to detection of exacerbation requiring oral or IV antibiotics was shorter in the intervention group compared with the control group. No detectable change in lung function.                                                                                                                                                                                                                                                                                                   |
| 72 | Wood J, et al. High usability of a smartphone application for reporting symptoms in adults with cystic fibrosis. J Telemed Telecare. 2018;24(8):547-552.                                                                         | 2018 | Australia | Cystic fibrosis                | Not given                                               | Research           | Journal article | Delayed reporting of symptoms can result in more severe exacerbations and worse outcomes. |                                                                            | App             | Not reported | 12 questions re symptoms associated with exacerbation that alert a nurse if respondents answer yes.                                                                                                                  | Study looked at HCP response to the app questions using 45 clinical scenarios. Excellent usability and near-perfect agreement interpreting the app responses.                                                                                                                                                                                                                                                                                                                                                                                                                           |
