# Supplementary material for: Needs of people with rare diseases that can be supported by electronic resources: a scoping review
Source: PubMed Central journal article supplement — BMJ Open. 2022 Sep 1;12(9):e060394. doi: 10.1136/bmjopen-2021-060394 (PMC9438091; doi:10.1136/bmjopen-2021-060394), 2022-09-01
Supplement: bmjopen-2021-060394supp001.pdf [file bmjopen-2021-060394supp001.pdf]

## PRISMA-ScR Checklist

| Section             | Subsection                                           | Item | Page of Mss                |
|---------------------|------------------------------------------------------|------|----------------------------|
| <b>Title</b>        |                                                      | 1    | 1                          |
| <b>Abstract</b>     | Structured summary                                   | 2    | 1                          |
| <b>Introduction</b> | Rationale                                            | 3    | 3                          |
|                     | Objectives                                           | 4    | 4                          |
| <b>Methods</b>      | Protocol and registration                            | 5    | 4                          |
|                     | Eligibility criteria                                 | 6    | 4                          |
|                     | Information sources                                  | 7    | 4                          |
|                     | Search                                               | 8    | 4                          |
|                     | Selection of sources of evidence                     | 9    | 4                          |
|                     | Data charting process                                | 10   | 5                          |
|                     | Data items                                           | 11   | 5                          |
|                     | Critical appraisal of individual sources of evidence | 12   | NA for this scoping review |
|                     | Summary measures                                     | 13   | NA for scoping reviews     |
|                     | Synthesis of results                                 |      | 5                          |
|                     | Risk of bias across studies                          | 15   | NA for scoping reviews     |
|                     | Additional analysis                                  | 16   | NA for scoping reviews     |
| <b>Results</b>      | Selection of sources of evidence                     | 17   | 5 ff                       |
|                     | Characteristics of sources of evidence               | 18   | 7 ff                       |
|                     | Critical appraisal within sources of evidence        | 19   | NA for this scoping review |
|                     | Synthesis of results                                 | 20   | 8, 12                      |
|                     | Risk of bias across studies                          | 22   | NA for scoping reviews     |
|                     | Additional analysis                                  | 23   | NA for scoping reviews     |
| <b>Discussion</b>   | Summary of evidence                                  | 24   | 13                         |
|                     | Limitations                                          | 25   | 14                         |
|                     | Conclusions                                          | 26   | 14                         |
| <b>Funding</b>      |                                                      | 27   | 15                         |

From: Tricco AC, Lillie E, Zarin W, O'Brien KK, Colquhoun H, Levac D, et al. PRISMA Extension for Scoping Reviews (PRISMA-ScR): Checklist and Explanation. *Ann Intern Med.* 2018;169(7):467-73.
