# Supplementary material for: Needs of people with rare diseases that can be supported by electronic resources: a scoping review
Source: PubMed Central journal article supplement — BMJ Open. 2022 Sep 1;12(9):e060394. doi: 10.1136/bmjopen-2021-060394 (PMC9438091; doi:10.1136/bmjopen-2021-060394), 2022-09-01
Supplement: bmjopen-2021-060394supp003.pdf [file bmjopen-2021-060394supp003.pdf]

|   | A                                                                                                                                                                                                                                                                               | B    | C       | D               | E                                                                         | F                     | G                   | H                                                                                                                                 | I                                                                                                                                                                                                                                                                                                                                                                                        | J               | K            | L                                                                                                                                                                                                                                                                                                                                                             | M                                                                                                          |
|---|---------------------------------------------------------------------------------------------------------------------------------------------------------------------------------------------------------------------------------------------------------------------------------|------|---------|-----------------|---------------------------------------------------------------------------|-----------------------|---------------------|-----------------------------------------------------------------------------------------------------------------------------------|------------------------------------------------------------------------------------------------------------------------------------------------------------------------------------------------------------------------------------------------------------------------------------------------------------------------------------------------------------------------------------------|-----------------|--------------|---------------------------------------------------------------------------------------------------------------------------------------------------------------------------------------------------------------------------------------------------------------------------------------------------------------------------------------------------------------|------------------------------------------------------------------------------------------------------------|
|   | Reference                                                                                                                                                                                                                                                                       | Year | Country | Rare disease    | Name of intervention/resource if applicable                               | Research or available |                     | Needs/barriers to care                                                                                                            | Details                                                                                                                                                                                                                                                                                                                                                                                  | e-resource      | Language/s   | e-resource details                                                                                                                                                                                                                                                                                                                                            | Findings (if research only)                                                                                |
| 1 | Ackbarali TA, et al. Assessing Patient and Provider Perspectives, Clinical Practice, Behaviors, and Knowledge on Hemophilia A Care. <i>Blood</i> ; 05 Nov2020. p. 24-5.                                                                                                         | 2020 | USA     | Haemophilia     | a web-based joint educational initiative for patients/caregivers and HCPs | Research              | Conference abstract | Management of severe haemophilia is rapidly evolving - patients, carers and HCPs alike unsure of new treatments but keen to learn |                                                                                                                                                                                                                                                                                                                                                                                          | website active  | Not given    | 1-hour online video-based CME activity for HCPs and 1-hour healthcare education activity for patients were created in June, 2020 to address identified practice and knowledge needs among HCPs, and knowledge, communication and self-efficacy behaviors among patients. Each activity consisted of slides, polling and live questions, and remains on-demand |                                                                                                            |
| 2 | Aizawa R, et al. Status of narcolepsy-related information available on the Internet in Japan and its effective use. <i>Sleep and Biological Rhythms</i> . 2008;6(4):201-7.                                                                                                      | 2008 | Japan   | Narcolepsy      | Existing internet resources                                               | publicly available    | Journal article     | High quality web-based information can reduce time to diagnosis for people with narcolepsy                                        | Useful, harmful information is low on search engine rankings.                                                                                                                                                                                                                                                                                                                            | website passive | Not given    | Existing web-based resources                                                                                                                                                                                                                                                                                                                                  | Patients were asking for info on the hereditary nature of the disease and ways to deal with their disease. |
| 3 | Al-Saleh H, et al. Beta testing of the "MY CF" smartphone/tablet app: In patients with cystic fibrosis. Conference Abstract presented at American Journal of Respiratory and Critical Care Medicine. Conference: American Thoracic Society International Conference, ATS; 2014. | 2014 | USA     | Cystic fibrosis | MY CF                                                                     | Research              | Conference abstract | Complicated self-management                                                                                                       | Difficulties keeping track of medications, test results and symptoms for adolescents or parents of younger children with CF.                                                                                                                                                                                                                                                             | App             |              | Android OS for phone or tablet. The three most favored functionalities of the app were: Medication list, Symptom Diary, and Weight/Height/Body Mass Index monitoring. 32 invited to participate; of 23 who did, majority wanted to continue using it and would recommend it                                                                                   |                                                                                                            |
| 4 | Armayones M, et al. APTIC: A social network to improve the quality of life of members of patients' associations. Conference Abstract presented at Orphanet Journal of Rare Diseases. Conference: 5th European Conference on Rare Diseases, ECRD; 2010.                          | 2010 | Spain   | Rare diseases   | APTIC                                                                     | publicly available    | Conference abstract | Fragmentation of information regarding rare diseases                                                                              | Need for people to learn from one another, share experiences                                                                                                                                                                                                                                                                                                                             | social platform | Not given    | Social networking platform that aims at enabling the individual members of patients' associations (mostly parents of children with chronic and rare diseases) to share experiences, information, advice                                                                                                                                                       |                                                                                                            |
| 5 | Aznar J, et al. Telemedicine in Hemophilia: Virtual consultation for the hematologist at patient's home. <i>Haemophilia</i> ; July2012. p. 72.                                                                                                                                  | 2012 | Spain   | Haemophilia     | domiciliary virtual consultation and virtual monitoring tools             | Research              | Conference abstract | Frequent hospital visits impact QoL                                                                                               | Domiciliary replacement therapy (DRT) ensures rapid infusion of lacking factors when any bleeding episode occurs and reduces hospital dependency of patients with hemophilia. However, these patients still have to visit the hospital frequently because the hematologist can prescribe general guidelines for home-replacement therapy but cannot adapt them to the bleeding evolution | telehealth      | Not reported | Three interventions: (1) patient entered bleeding episode and self managed treatment; (2) virtual monitoring by ultrasound of haemarthroses, (3) Virtual consult                                                                                                                                                                                              | Successful in 45 patients which in turn may decrease dependency on hospital visits and by association QoL  |
| 6 |                                                                                                                                                                                                                                                                                 |      |         |                 |                                                                           |                       |                     |                                                                                                                                   |                                                                                                                                                                                                                                                                                                                                                                                          |                 |              |                                                                                                                                                                                                                                                                                                                                                               |                                                                                                            |

|    | A                                                                                                                                                                                                                                                                                                                                                                         | B    | C      | D                                                                                          | E                                       | F        | G                   | H                                                                                                                                                                  | I                                                                                                                                                                                                                                                                                                                                                                                                      | J               | K                                                     | L                                                                                                                                                                                                                                                                                                                                                                                                                                                                     | M                                                                                                                                                                                                                        |
|----|---------------------------------------------------------------------------------------------------------------------------------------------------------------------------------------------------------------------------------------------------------------------------------------------------------------------------------------------------------------------------|------|--------|--------------------------------------------------------------------------------------------|-----------------------------------------|----------|---------------------|--------------------------------------------------------------------------------------------------------------------------------------------------------------------|--------------------------------------------------------------------------------------------------------------------------------------------------------------------------------------------------------------------------------------------------------------------------------------------------------------------------------------------------------------------------------------------------------|-----------------|-------------------------------------------------------|-----------------------------------------------------------------------------------------------------------------------------------------------------------------------------------------------------------------------------------------------------------------------------------------------------------------------------------------------------------------------------------------------------------------------------------------------------------------------|--------------------------------------------------------------------------------------------------------------------------------------------------------------------------------------------------------------------------|
| 7  | Badiu C, et al. Developing and evaluating rare disease educational materials co-created by expert clinicians and patients: the paradigm of congenital hypogonadotropic hypogonadism. <i>Orphanet Journal of Rare Diseases</i> . 2017;12(1)                                                                                                                                | 2017 | Europe | congenital hypogonadotropic hypogonadism (CHH) and the olfacto-genital (Kallmann) syndrome | Educational package                     | Research | Journal article     | Need for high quality information/education on rare diseases                                                                                                       | Important it is easy to read and engaging                                                                                                                                                                                                                                                                                                                                                              | website passive | 20 languages                                          | patient education materials                                                                                                                                                                                                                                                                                                                                                                                                                                           | Appropriate reading level and accessibility                                                                                                                                                                              |
| 8  | Balestri E, et al. 'F (accio) C (entro)': Project for a smartphone application to increase adherence to aerosol treatment in adolescents with cystic fibrosis. Conference Abstract presented at Italian Journal of Pediatrics. Conference: 25th Italian Congress of Cystic Fibrosis and the 15th National Congress of Cystic Fibrosis Italian Society. Milan Italy; 2020. | 2020 | Italy  | Cystic fibrosis                                                                            | Faccio Centro                           | Research | Conference abstract | Complicated self-management with decreasing adherence from adolescents                                                                                             | Patients with Cystic fibrosis have onerous therapy - respiratory physiotherapy, therapy by aerosol, oral, intravenous and physical activity. During adolescence the therapy adherence, that is undergoing treatments at the right time of the day, in the right sequence and dosage, considerably decreases with negative consequences in terms of: health status, quality of life and hospitalization | App             |                                                       | Mobile phone app - lists daily therapy, with instructions on order, progress tracking, alerts for when to start and when checks are needed. Also can email questions to HCP team.                                                                                                                                                                                                                                                                                     |                                                                                                                                                                                                                          |
| 9  | Barazani Brutman T, et al. New communication technologies improve hemophilia care. <i>Haemophilia</i> . 2017;23(Supplement 2):134-5.                                                                                                                                                                                                                                      | 2017 | Israel | Haemophilia                                                                                | WhatsApp social support group messaging | Research | Conference abstract | Parents with newly diagnosed children require immediate response when things happen                                                                                |                                                                                                                                                                                                                                                                                                                                                                                                        | social platform | Not given                                             | Social support groups of parents, patients and medical staff WhatsApp. Parents, patients and medical staff used the WhatsApp application installed on smartphone to provide immediate response to various issues: queries regarding bleeds (with relevant photos), queries regarding dosage/ frequency of therapy, queries about quality of life (QOL) and specific situations noted at school/ kindergarden, personal communication and general consult and support. | Extension of physical groups at the treatment centre.                                                                                                                                                                    |
| 10 | Blackwell LS, et al. CFone: A social networking site for adolescents and young adults with cf. <i>Pediatric Pulmonology</i> . 2012;35):430.                                                                                                                                                                                                                               | 2012 | USA    | Cystic fibrosis                                                                            | CFOne                                   | Research | Conference abstract | Transition from child to adult requires increased independence and self efficacy                                                                                   | Social support associated with better psychological wellbeing and better outcomes.                                                                                                                                                                                                                                                                                                                     | social platform | Not given                                             | online peer support program for adolescents and young adults with CF                                                                                                                                                                                                                                                                                                                                                                                                  | Social networking sites for adolescents and young adults with CF may be useful for increasing knowledge of disease management, increasing perceptions of social support and improving mental health and quality of life. |
| 11 | Boon M, et al. Use of a mobile application for self-management of pancreatic enzyme replacement therapy is associated with improved gastro-intestinal related quality of life in children with Cystic Fibrosis. <i>Journal of Cystic Fibrosis</i> . 2020;19(4):562-568                                                                                                    | 2020 | Europe | Cystic fibrosis                                                                            | MyCyFAPP                                | Research | Journal article     | Complicated self (parental)-management for gastrointestinal distress in children                                                                                   | Most patients with cystic fibrosis (CF) suffer from pancreatic insufficiency, leading to fat malabsorption, malnutrition, abdominal discomfort and impaired growth. Pancreatic enzyme replacement therapy (PERT) effective but evidence-base on dosing still being built. This uses a new algorithm.                                                                                                   | App             | Dutch, English, Flemish, Italian, Portuguese, Spanish | App calculates individual PERT-doses for optimal fat digestion and includes a symptoms diary, educational material, and it is linked to a web tool allowing HCPs to view data and give feedback.                                                                                                                                                                                                                                                                      | Increased GI QoL measures.                                                                                                                                                                                               |
| 12 | Breakey VR, et al. A feasibility study of "managing hemophilia online": An Internet-based self-management and transitional care program for teens. <i>Haemophilia</i> . 2012;3):207-8.                                                                                                                                                                                    | 2012 | Canada | Haemophilia                                                                                | online self-management intervention     | Research | Conference abstract | Adolescents have heightened educational needs as they learn to manage their disease and become self-sufficient in preparation for transition to adult health care. |                                                                                                                                                                                                                                                                                                                                                                                                        | website passive | English and French                                    | Online course - not clear if it is interactive. Pilot - still working it out                                                                                                                                                                                                                                                                                                                                                                                          |                                                                                                                                                                                                                          |

|    | A                                                                                                                                                                                                                                                                 | B    | C      | D               | E                                                | F        | G                   | H                                                                                                                                                                                                           | I                                                                                                                                                                                                                                                                                                    | J              | K                                                     | L                                                                                                                                                                                                | M                                                                                                                                                                                                                                                                                                                                                                                                                                             |
|----|-------------------------------------------------------------------------------------------------------------------------------------------------------------------------------------------------------------------------------------------------------------------|------|--------|-----------------|--------------------------------------------------|----------|---------------------|-------------------------------------------------------------------------------------------------------------------------------------------------------------------------------------------------------------|------------------------------------------------------------------------------------------------------------------------------------------------------------------------------------------------------------------------------------------------------------------------------------------------------|----------------|-------------------------------------------------------|--------------------------------------------------------------------------------------------------------------------------------------------------------------------------------------------------|-----------------------------------------------------------------------------------------------------------------------------------------------------------------------------------------------------------------------------------------------------------------------------------------------------------------------------------------------------------------------------------------------------------------------------------------------|
| 13 | Breakey VR, et al. A pilot randomized control trial to evaluate the feasibility of an internet-based self-management and transitional care program for youth with haemophilia. <i>Haemophilia</i> . 2014;20(6):784-93.                                            | 2014 | Canada | Haemophilia     | Teens Taking Charge: Managing Hemophilia Online' | Research | Journal article     | Adolescents have heightened educational needs as they learn to manage their disease and become self-sufficient in preparation for transition to adult health care.                                          |                                                                                                                                                                                                                                                                                                      | website active | English and French                                    | 8 week educational program on line with weekly telephone support from a trained Research Assistant.                                                                                              | Teens on the intervention arm showed significant improvement in disease-specific knowledge (P = 0.004), self-efficacy (P = 0.007) and transition preparedness (P = 0.046). There was a statistically significant improvement in knowledge in the intervention group when compared to the control group (P = 0.01). Overall, the teens found the website to be informative, comprehensive and easy to use and were satisfied with the program. |
| 14 | Breakey VR, et al. Feasibility study of a randomized control trial to evaluate an internet-based self-management program for adolescents with hemophilia: Preliminary results and observations. <i>Journal of Thrombosis and Haemostasis</i> ; July2013. p. 1058. | 2013 | Canada | Haemophilia     | Teens Taking Charge: Managing Hemophilia Online' | Research | Conference abstract | Adolescents have heightened educational needs as they learn to manage their disease and become self-sufficient in preparation for transition to adult health care.                                          |                                                                                                                                                                                                                                                                                                      | website active | English and French                                    | 8 week educational program on line with weekly telephone support from a trained Research Assistant.                                                                                              | Overall, these teens found the website to be informative, comprehensive and easy to use and were satisfied with the program.                                                                                                                                                                                                                                                                                                                  |
| 15 | Breakey VR, et al. The value of usability testing for Internet-based adolescent self-management interventions: "Managing Hemophilia Online". <i>BMC medical informatics and decision making</i> . 2013;13:113.                                                    | 2013 | Canada | Haemophilia     | Teens Taking Charge: Managing Hemophilia Online' | Research | Conference abstract | Adolescents have heightened educational needs as they learn to manage their disease and become self-sufficient in preparation for transition to adult health care.                                          |                                                                                                                                                                                                                                                                                                      | website active | English and French                                    | 8 week educational program on line. Course contained multimedia components (videos, animations, quizzes)                                                                                         |                                                                                                                                                                                                                                                                                                                                                                                                                                               |
| 16 | Calvo-Lerma J, et al. Clinical evaluation of an evidence-based method based on food characteristics to adjust pancreatic enzyme supplements dose in cystic fibrosis. <i>Journal of Cystic Fibrosis</i> . 2020.                                                    | 2020 | Europe | Cystic fibrosis | MyCyFAPP                                         | Research | Journal article     | Complicated self (parental)-management for gastrointestinal distress in children                                                                                                                            | Most patients with cystic fibrosis (CF) suffer from pancreatic insufficiency, leading to fat malabsorption, malnutrition, abdominal discomfort and impaired growth. Pancreatic enzyme replacement therapy (PERT) effective but evidence-base on dosing still being built. This uses a new algorithm. | App            | Dutch, English, Flemish, Italian, Portuguese, Spanish | App calculates individual PERT-doses for optimal fat digestion and includes a symptoms diary, educational material, and it is linked to a web tool allowing HCPs to view data and give feedback. | Improved fat absorption for those with poor baseline measures.                                                                                                                                                                                                                                                                                                                                                                                |
| 17 | Calvo-Lerma J, et al. Change in nutrient and dietary intake in European children with cystic fibrosis after a 6-month intervention with a self-management mhealth tool. <i>Nutrients</i> . 2021;13(6)                                                             | 2021 | Europe | Cystic fibrosis | MyCyFAPP                                         | Research | Journal article     | People with CF have increased energy needs and a diet with a specific nutrient distribution. Nutritional status is an indicator of disease prognosis and survival. Self(parental)-management is complicated | App provided educational resources about nutrition and dietary advice for parents                                                                                                                                                                                                                    | App            | Dutch, English, Flemish, Italian, Portuguese, Spanish | Food diary, nutrition follow-up (goals), symptoms diary (health diary), nutrition educational material (living with CF) and messages among other functions                                       | Users had modest improvements towards the nutritional guidelines                                                                                                                                                                                                                                                                                                                                                                              |
| 18 | Carr SB, et al. Children and adults Tai Chi study (CF-CATS2): A randomised controlled feasibility study comparing internet-delivered with face-to-face Tai Chi lessons in cystic fibrosis. <i>ERJ Open Research</i> . 2018;4(4)                                   | 2018 | UK     | Cystic fibrosis | NA                                               | Research | Journal article     | Maintaining exercise difficult for people with CF due to isolation.                                                                                                                                         | 8 lessons over 3 months, delivered face to face (n=22) or via internet (n=18) for 40 adults and children with CF.                                                                                                                                                                                    | telehealth     | English                                               | Lessons delivered over Skype; also had a DVD, booklet, stickers and t-shirts aimed at different ages to increase adherence.                                                                      | Feasibility and safety were demonstrated. All participants showed significant improvements in self-reported sleep, cough (both daytime and night-time), stomach ache and breathing. No differences in lung function, health status, quality of life, sleep or mindfulness was shown before or after completing the lessons.                                                                                                                   |
| 19 | Carr SB, et al. Children and adults Tai Chi study (CF-CATS2): A randomised controlled feasibility study comparing internet-delivered with face-to-face Tai Chi lessons in cystic fibrosis. <i>ERJ Open Research</i> . 2018;4(4).                                  | 2018 | UK     | Cystic fibrosis | Internet delivered Tai-Chi class                 | Research | Journal article     | Isolation yet needing tailored exercise                                                                                                                                                                     | Maintaining an exercise regime can be difficult in cystic fibrosis: group classes risk potential infection, yet motivation is hard to maintain when alone.                                                                                                                                           | telehealth     | English                                               | Comparison of F2F and internet classes                                                                                                                                                           | Improvements in sleep, cough, GI symptoms and breathing but no diff in lung function, health status and QoL. Findings same in both groups.                                                                                                                                                                                                                                                                                                    |

|    | A                                                                                                                                                                                                                                                                        | B    | C            | D                            | E                                                           | F                    | G                   | H                                                                                                                                           | I                                                                                                                                                                                                                                                                                                                                                                                                                                                                                                                                                                                                                                                                                | J               | K         | L                                                                                                | M                                                                                                                                                                                                                                                                                                                                                                                                                                                                                                                                                                                                                                                                                                                                                                                                                                                                                                                                                                                                                                                                                                                                                                                                                                                                                                                                                                                                                                                                                                                                                                                                                                                                                 |
|----|--------------------------------------------------------------------------------------------------------------------------------------------------------------------------------------------------------------------------------------------------------------------------|------|--------------|------------------------------|-------------------------------------------------------------|----------------------|---------------------|---------------------------------------------------------------------------------------------------------------------------------------------|----------------------------------------------------------------------------------------------------------------------------------------------------------------------------------------------------------------------------------------------------------------------------------------------------------------------------------------------------------------------------------------------------------------------------------------------------------------------------------------------------------------------------------------------------------------------------------------------------------------------------------------------------------------------------------|-----------------|-----------|--------------------------------------------------------------------------------------------------|-----------------------------------------------------------------------------------------------------------------------------------------------------------------------------------------------------------------------------------------------------------------------------------------------------------------------------------------------------------------------------------------------------------------------------------------------------------------------------------------------------------------------------------------------------------------------------------------------------------------------------------------------------------------------------------------------------------------------------------------------------------------------------------------------------------------------------------------------------------------------------------------------------------------------------------------------------------------------------------------------------------------------------------------------------------------------------------------------------------------------------------------------------------------------------------------------------------------------------------------------------------------------------------------------------------------------------------------------------------------------------------------------------------------------------------------------------------------------------------------------------------------------------------------------------------------------------------------------------------------------------------------------------------------------------------|
| 20 | Castro RA, et al. Exploring the Views of Osteogenesis Imperfecta Caregivers on Internet-Based Technologies: Qualitative Descriptive Study. J Med Internet Res. 2019;21(12):e15924.                                                                                       | 2019 | Canada       | Osteogenesis Imperfecta (OI) | Exploring use of what's available online and what is needed | publicly available   | Journal article     | Multiple needs                                                                                                                              | (1) Distraction for children after surgery to promote rest and immobilization, or to distract from painful or frightening procedures etc; (2) Isolation from family or friends at a distance or in unsafe places for the child to visit; (3) Carers' self care; (4) Parents and carers feeling distressed by the disease and child's suffering; (5) Managing logistics of caregiving/ HCPs (6) Communication with HCP; (7) Facilitating care; (8) Information seeking; (9) social isolation (10) Updates on research and new treatments (11) Concern about quality, security (12) wishlist (13) caregivers desired child-friendly and age-appropriate (14) In their own language | other           |           |                                                                                                  | (1) Games, videos, audio books have a calming affect to distract from boredom, pain or fear; (2) Social media platforms like FaceTime useful for staying in touch; (3) Can be a lot of waiting for appointments and then keeping the child quiet at home after surgeries etc. Yoga apps, games and ; (4) Watching inspirational videos of other children with OI doing well gave hope; (5) Booking online much easier and e-calendars useful to store all appointments; (6) Some allowed email or messaging (e.g., to SW or PT); (7) Some tools allowed carers to find local community and care resources - e.g., wheelchair accessibility of local shopping centre etc. Appropriately adapted sports programs; (8) Found via Google so not optimal (9) Social media specifically for OI - share day-to-day care information rather than using it for specific information on prognoses or treatments. Some caregivers were more interested in answering others' questions than in having their own questions answered. OI parents were the ones who know practical day-to-day care strategies, such as where to find adaptive clothing and winter boots that would fit her child's physique. Claimed to get faster information from a social media platform group rather than an HCP. (10) Access to information; (11) Concerned about web-based predators or cyberbullies or judgement from other parents. Often were confronted with worst-case scenarios that were not applicable to their own children. (12) Web-based home fracture-splinting videos with diverse techniques for every fracture possible • Web-based videos portraying OI patients before and after various |
| 21 | Cipriani D, Dulcan E. See and be seen: The CF community. Pediatric Pulmonology. 2017;52(Supplement 47):147-148.                                                                                                                                                          | 2017 | USA          | Cystic fibrosis              | BreatheCon                                                  | limited availability | Conference abstract | CF considered an invisible disease; social support limited by infection risk; niche information hard to find; mental health often impacted. | Lack of understanding of peers and family when the disease is "invisible." Desire to connect with people with the same disease (who "get it") but face-to-face not possible. telling your boss about CF as well as colleagues, classmates, friends, in-laws and other new family. The alienation of invisibility is compounded by uncomfortable, lonely, boring treatments. When life expectancy improves for a cohort of patients, little information about reproduction, family planning, safe sex practices, genetic                                                                                                                                                          | social platform | Not given | Online conferences for people with CF subdivided into adults, parents/children and young people. |                                                                                                                                                                                                                                                                                                                                                                                                                                                                                                                                                                                                                                                                                                                                                                                                                                                                                                                                                                                                                                                                                                                                                                                                                                                                                                                                                                                                                                                                                                                                                                                                                                                                                   |
| 22 | Colman AW, et al. Use of Quick Response (QR) coded bracelets and cards for the improvement of cortisol deficiency/Addison's disease management: An audit of quality of care of the management of steroid deficiency in acute illness. BMJ Innovations. 2018;4(3):115-22. | 2018 | UK (England) | Addison's disease            | Quick response coded bracelet                               | Research             | Journal article     | Adrenal crisis is life-threatening and requires swift intervention but is very rare                                                         | Study of HCPs - clinically needed / useful?                                                                                                                                                                                                                                                                                                                                                                                                                                                                                                                                                                                                                                      | website passive | Not given | Bracelet has a scannable QR code that links to emergency management information                  | Clinical need identified                                                                                                                                                                                                                                                                                                                                                                                                                                                                                                                                                                                                                                                                                                                                                                                                                                                                                                                                                                                                                                                                                                                                                                                                                                                                                                                                                                                                                                                                                                                                                                                                                                                          |
| 23 | Cox NS, et al. A web-based intervention to promote physical activity in adolescents and young adults with cystic fibrosis: protocol for a randomized controlled trial. BMC polim. 2019;19(1):253.                                                                        | 2019 | Australia    | Cystic fibrosis              | ActivOnline                                                 | Research             | Journal article     | Tailored exercise program without risk of infection                                                                                         |                                                                                                                                                                                                                                                                                                                                                                                                                                                                                                                                                                                                                                                                                  | website active  | Not given | internet-based physical activity program for 12 weeks for adolescents and young adults           | Protocol                                                                                                                                                                                                                                                                                                                                                                                                                                                                                                                                                                                                                                                                                                                                                                                                                                                                                                                                                                                                                                                                                                                                                                                                                                                                                                                                                                                                                                                                                                                                                                                                                                                                          |

|    | A                                                                                                                                                                                             | B    | C         | D                           | E                                                             | F                    | G                   | H                                                                                                                                               | I                                                                                                                                                                                                                                                                                                                                                                                                                                                                                                                            | J               | K                                                     | L                                                                                                                                                                                                                                                                                                                      | M                                                                                                                                                                                                                                                                                                                                                                                                                                                                                                                                                                                                                                                                                                               |
|----|-----------------------------------------------------------------------------------------------------------------------------------------------------------------------------------------------|------|-----------|-----------------------------|---------------------------------------------------------------|----------------------|---------------------|-------------------------------------------------------------------------------------------------------------------------------------------------|------------------------------------------------------------------------------------------------------------------------------------------------------------------------------------------------------------------------------------------------------------------------------------------------------------------------------------------------------------------------------------------------------------------------------------------------------------------------------------------------------------------------------|-----------------|-------------------------------------------------------|------------------------------------------------------------------------------------------------------------------------------------------------------------------------------------------------------------------------------------------------------------------------------------------------------------------------|-----------------------------------------------------------------------------------------------------------------------------------------------------------------------------------------------------------------------------------------------------------------------------------------------------------------------------------------------------------------------------------------------------------------------------------------------------------------------------------------------------------------------------------------------------------------------------------------------------------------------------------------------------------------------------------------------------------------|
| 24 | Cox NS, et al. Feasibility and acceptability of an Internet-Based program to promote physical activity in adults with cystic fibrosis. <i>Respiratory Care</i> . 2015;60(3):422-9.            | 2015 | Australia | Cystic fibrosis             | ActivOnline                                                   | Research             | Journal article     | Tailored exercise program without risk of infection                                                                                             |                                                                                                                                                                                                                                                                                                                                                                                                                                                                                                                              | website active  | Not given                                             | internet-based physical activity program for 8 weeks for adults. Also fortnightly phone consult                                                                                                                                                                                                                        | Feasible and acceptable                                                                                                                                                                                                                                                                                                                                                                                                                                                                                                                                                                                                                                                                                         |
| 25 | Cummings E, et al. Enhancing self-efficacy for self-management in people with cystic fibrosis. <i>Studies in Health Technology and Informatics</i> . 2011;169:33-37.                          | 2011 | Australia | Cystic fibrosis             |                                                               |                      |                     | Complicated self-management                                                                                                                     | Health mentoring project with 3 groups: (1) Self-efficacy web-based program + mentor via phone, (2) mentor via phone + self-efficacy program +App, (3) usual care.                                                                                                                                                                                                                                                                                                                                                           | App             | English                                               | App consisted on Symptom diary plus optional feedback on progress                                                                                                                                                                                                                                                      | Results show the intervention was generally considered to be useful and allowed CF individuals to focus on changes in symptoms. Self-efficacy increased in subjects in both intervention groups, but it is unclear from the results if the application provided additional benefits beyond supporting the mentoring intervention.                                                                                                                                                                                                                                                                                                                                                                               |
| 26 | D'Ambrosio C. Open versus closed social networking groups. <i>Haemophilia</i> . 2014;3:183.                                                                                                   | 2014 | USA       | Bleeding disorders in women | MyGirlsBlood                                                  | publicly available   | Conference abstract | Little information for this group of women; social isolation                                                                                    | Debate over whether open or closed group better. Closed for safety discussing personal details but reinforces it as a "secret" and shuts out others who may help / get it on the research agenda.                                                                                                                                                                                                                                                                                                                            | social platform | Not given                                             | Open group (not closed) on Facebook where people can ask questions or share experiences.                                                                                                                                                                                                                               | Having closed social networks are needed for groups that need privacy and security in their communications. WWBD need privacy to learn from one another and to solve intimate problems. However, when there are only closed groups, awareness ceases to exist across the larger multi-disciplinary and diverse worldwide community. Many would like to help, but would not be permitted in a closed group for WWBD.                                                                                                                                                                                                                                                                                             |
| 27 | Decker K, Meilleur C. CBDR and MyCBDR advancing hemophilia nursing practice in Canada. Conference Abstract presented at Haemophilia; May, 2018                                                | 2018 | Canada    | Haemophilia                 | MyCBDR (linked to Canadian Bleeding Disorder Registry (CBDR)) | limited availability | Conference abstract | Complicated self-management                                                                                                                     | Better outcomes from new treatment regimes but requires detailed record keeping to accurately monitor bleeding episodes, factor usage and adherence to treatment regimens.                                                                                                                                                                                                                                                                                                                                                   | App             | Not reported                                          | Links to CBDR - app allows people with a bleeding disorder to add track infusions and symptoms. Data available to all Haemophilia Treatment Centres in Canada meaning greater integration for specialist services.                                                                                                     | Useful tool that allows access to detailed information to the care teams and by implication, better treatment outcomes                                                                                                                                                                                                                                                                                                                                                                                                                                                                                                                                                                                          |
| 28 | Fidika A, et al. A web-based psychological support program for caregivers of children with cystic fibrosis: A pilot study. <i>Health and Quality of Life Outcomes</i> . 2015;13(1)            | 2015 | Germany   | Cystic fibrosis             | WEP-CARE                                                      | Research             | Journal article     | Parents caring for a child with Cystic Fibrosis (CF) are at high risk for psychological distress and have limited access to psychological care. | Severe distress not unusual. Lack of appropriate and knowledgeable support.                                                                                                                                                                                                                                                                                                                                                                                                                                                  | website active  | Not given                                             | Web-based writing therapy - 9 sessions, tailored for the specific needs of caregivers. Written assignments that were given feedback within 48 hours. The intervention program was provided by two trained and supervised psychotherapists with expertise in psychosocial care for patients with CF and their families. | On average, the caregivers' symptoms of anxiety decreased statistically significant and clinical relevant about five points from an elevated (M=11.4; SD =2.6) to a normal level (M=6.7; SD =2.6; p < .001) between pre and post treatment. Fear of disease progression (p < .001) and symptoms of depression (p = .02) significantly decreased as well. Quality of life significantly improved (p = .01). The effects were maintained at the 3-months follow-up assessment.                                                                                                                                                                                                                                    |
| 29 | Floch J, et al. Users' Experiences of a Mobile Health Self-Management Approach for the Treatment of Cystic Fibrosis: Mixed Methods Study. <i>JMIR mHealth and uHealth</i> . 2020;8(7):e15896. | 2020 | Europe    | Cystic fibrosis             | MyCyFAPP                                                      | Research             | Journal article     | Complicated self-management                                                                                                                     | Overall positive experience but food recording was seen as too complicated. Once people met their goals, lost motivation to continue using the app. HCPs also reported that information communicated by patients is more reliable and accurate. Normally, patients do not record data systematically. They forget details or get information mixed up. Empowering patients to record events at the time they occur, HCPs felt that the data they receive are more precise and better reflect the reality of patients' status | App             | Dutch, English, Flemish, Italian, Portuguese, Spanish | Food diary, nutrition follow-up (goals), symptoms diary (health diary), nutrition educational material (living with CF) and messages among other functions                                                                                                                                                             | Patients and parents had different skills, requiring follow-up by HCPs in an introductory phase. HCPs valued obtaining precise information about the patients, allowing for more personalized advice. However, the tight follow-up of several patients led to an increased workload. Over time, as patient self-efficacy increased, patient motivation for using the app decreased and the quality of the reported data was reduced. They suggest focusing on patients with poor control using the app; all patients using it for the week before a consult. Introducing all the features of the app at once can be overwhelming - staged approach better. Personalising it with help from the HCP also useful. |

|    | A                                                                                                                                                                                                                                    | B    | C          | D                                     | E                                                     | F                    | G                   | H                                                                                                                         | I                                                                                                                                                                                       | J               | K            | L                                                                                                                                                                                                        | M                                                                                                                                                                                                                                                                                                                                                                                                                                                                                                                                |
|----|--------------------------------------------------------------------------------------------------------------------------------------------------------------------------------------------------------------------------------------|------|------------|---------------------------------------|-------------------------------------------------------|----------------------|---------------------|---------------------------------------------------------------------------------------------------------------------------|-----------------------------------------------------------------------------------------------------------------------------------------------------------------------------------------|-----------------|--------------|----------------------------------------------------------------------------------------------------------------------------------------------------------------------------------------------------------|----------------------------------------------------------------------------------------------------------------------------------------------------------------------------------------------------------------------------------------------------------------------------------------------------------------------------------------------------------------------------------------------------------------------------------------------------------------------------------------------------------------------------------|
| 30 | Gow J, et al. Participation in patient support forums may put rare disease patient data at risk of re-identification. <i>Orphanet Journal of Rare Diseases</i> . 2020;15(1)                                                          | 2020 | UK         | Rare diseases                         | Social support groups generally for people with RD    | publicly available   | Journal article     | Vulnerable to re-identification on social support platforms                                                               | Online social support groups may not have sufficient security to prevent malicious matching of health and personal data to re-identify anonymised data                                  | social platform |              |                                                                                                                                                                                                          |                                                                                                                                                                                                                                                                                                                                                                                                                                                                                                                                  |
| 31 | Grande SW, et al. Improving care for pediatric cystic fibrosis in Sweden using a successful mHealth patient support system. Conference Abstract presented at Pediatric Pulmonology; September, 2017.                                 | 2017 | Sweden     | Cystic fibrosis                       | Genia                                                 | limited availability | Conference abstract | Complicated self-management/tracking symptoms and treatments                                                              | Parents don't always recall symptoms and treatments for their child making it hard for HCPs to accurately assess the patient.                                                           | App             | Not reported | Patients/parents record daily health observations and complete reports about symptoms, medications, and goals immediately prior to a clinic appointment. Data available to HCPs at the consult.          | High uptake at the study hospital; HCP took QI approach to its implementation. Considered to have improved coordination and patient-provider consensus yet without greater HCP burden.                                                                                                                                                                                                                                                                                                                                           |
| 32 | Gulliams JM, et al. Feasibility and usefulness of a mobile health exercise intervention in women with lymphangioleiomyomatosis. Conference Abstract presented at <i>Cardiopulmonary Physical Therapy Journal</i> ; July, 2021.       | 2021 | Not given  | Lymphangioleiomyomatosis (LAM)        | Home based exercise program for women with LAM        | Research             | Conference abstract | Require tailored exercise program                                                                                         | Patients have reduced lung function and exercise tolerance; and a recent report indicates lower physical activity levels in LAM compared to patients with COPD and healthy populations. | App             | Not reported | App on smartphone with interfacing wearable and home monitoring devices. Check in with Physio weekly.                                                                                                    | 12 wk trial. Initial findings indicate feasibility and usefulness of an mHealth home exercise program for LAM, including good patient adherence and satisfaction with the program.                                                                                                                                                                                                                                                                                                                                               |
| 33 | Haik D, et al. The Online Support Group as a Community: A Thematic Content Analysis of an Online Support Group for Idiopathic Subglottic Stenosis. <i>Annals of Otolaryngology, Rhinology and Laryngology</i> . 2019;128(4):293-299. | 2019 | USA        | Idiopathic subglottic stenosis (ISGS) | Living With Idiopathic Subglottic Stenosis (LwiISGS), | publicly available   | Conference abstract | Access to information, sharing of experiences                                                                             |                                                                                                                                                                                         | social platform | Not given    | Online community specifically for people with ISGS                                                                                                                                                       | Analysis demonstrated that communications primarily encompassed three major thematic elements: (1) information sharing; (2) emotional support, expression, and experience sharing; and (3) community building. Positively toned posts grossly overshadowed negatively toned posts by almost a factor of 3. A significant portion of group members requested information from their peers, suggesting a high level of trust toward the resources provided in this group, even those involving a surgical procedure or medication. |
| 34 | Ho G, et al. Metabolic Diet App Suite for inborn errors of amino acid metabolism. <i>Molecular Genetics and Metabolism</i> . 2016;117(3):322-327.                                                                                    | 2016 | Canada     | Inborn errors of metabolism (IEM)     | Metabolic DietAppSuite                                | publicly available   | Journal article     | Burden of daily adherence to complex and time-consuming medical diet to attain metabolic control and prevent organ damage | Diet is only one of a number of competing priorities for people with IEM, but one of the most onerous. Poor nutritional labelling on many foods - restricts diet further.               | App             | Not reported | Online tool for mobile phones and desktops for 15 different IEMs. Creates a personalised dashboard including specific nutrient goals. Food diary, nutrient counts and able to add your homemade recipes. |                                                                                                                                                                                                                                                                                                                                                                                                                                                                                                                                  |
| 35 | Howard S, The All Wales Adult Cystic Fibrosis Centre (AWACFC) Virtual Instruction of Exercise with Technology to Enhance Care-VIEWTEC Programme. <i>Journal of Cystic Fibrosis</i> . 2014;2:S20                                      | 2014 | UK (Wales) | Cystic fibrosis                       | VIEWTEC Programme                                     | Research             | Conference abstract | Patients live 2 and 3 hours away from treatment centre but benefit from tailored exercise programs                        | Group exercise is more motivating                                                                                                                                                       | telehealth      | Not given    | virtual exercise sessions with a CF Gym Instructor. Email invitations and delivered via Cisco Webex                                                                                                      | Feasible and patients liked it.                                                                                                                                                                                                                                                                                                                                                                                                                                                                                                  |

|    | A                                                                                                                                                                                                                                                                                            | B    | C               | D                                        | E                                                   | F                  | G                   | H                                                                                                                           | I                                                                                                                                                  | J               | K                                                 | L                                                                                                                                                                                                                                                                                                                                                                                                                      | M                                                                                                                                                                                                                                                                                                                            |
|----|----------------------------------------------------------------------------------------------------------------------------------------------------------------------------------------------------------------------------------------------------------------------------------------------|------|-----------------|------------------------------------------|-----------------------------------------------------|--------------------|---------------------|-----------------------------------------------------------------------------------------------------------------------------|----------------------------------------------------------------------------------------------------------------------------------------------------|-----------------|---------------------------------------------------|------------------------------------------------------------------------------------------------------------------------------------------------------------------------------------------------------------------------------------------------------------------------------------------------------------------------------------------------------------------------------------------------------------------------|------------------------------------------------------------------------------------------------------------------------------------------------------------------------------------------------------------------------------------------------------------------------------------------------------------------------------|
| 36 | Huang X, et al. Developing and evaluating HE-APP: Acceptability and usability of a smartphone APP system to improve self-management in Chinese patients with haemophilia. Conference Abstract presented at Haemophilia; June, 2020                                                           | 2020 | China           | Haemophilia                              | HE-APP                                              |                    | Conference abstract | Complicated self-management linked to outcomes                                                                              | Outcomes linked to self management and accurate symptom-tracking.                                                                                  | App             | Mandarin?                                         | (1) recording of bleeding symptoms; (2) monitoring of treatment adherence; (3) education, training and support system; (4) accounting and analysing the use of the medicine; and (5) recording the economic cost.                                                                                                                                                                                                      | Acceptability and usability levels high among patients and their parents. Small trial with 10 patients.                                                                                                                                                                                                                      |
| 37 | Ingravallo F, et al. Telemedicine with mobile internet devices for innovative multidisciplinary patient-centred care of patients with narcolepsy. Protocol of the randomized controlled trial TENAR (TElemedicine for NARcolepsy). European Journal of Neurology. 2020;27(Supplement 1):516. | 2020 | Italy           | Narcolepsy                               | TENAR trial (Protocol)                              | Research           | Conference abstract | disease burden is increased by the need for traveling for medical consultations, with high costs for patients and families. |                                                                                                                                                    | telehealth      |                                                   |                                                                                                                                                                                                                                                                                                                                                                                                                        |                                                                                                                                                                                                                                                                                                                              |
| 38 | Kauw D, et al. The Contribution of Online Peer-to-Peer Communication Among Patients With Adrenal Disease to Patient-Centered Care. J Med Internet Res. 2015;17(3):e54.                                                                                                                       | 2015 | The Netherlands | Addison's disease and Cushing's syndrome | online forum moderated by the Dutch Adrenal Society | publicly available | Journal article     | Peer-to-peer information sharing                                                                                            |                                                                                                                                                    | social platform | Not given                                         | Public area and password protected area. Rules for posting e.g., posting medical information - must provide references. Moderated by volunteers.                                                                                                                                                                                                                                                                       | Analysis of content: 81% asking for more info about the disease; 10% asking for emotional support; Answers mostly practical tips and sharing own experiences. Seen as an important information source. Social support in the form of experiential info and emotional support - not able to be obtained from HCPs.            |
| 39 | Khair K, et al. Social networking for adolescents with haemophilia. Haemophilia. 2011;17(2):369.                                                                                                                                                                                             | 2011 | UK              | Haemophilia                              | VivaSix                                             | Research           | Conference abstract | Adherence to treatment difficult for adolescent boys with severe haemophilia                                                | Parents are often sole source of information outside of HCPs. Few know of other boys with haemophilia                                              | social platform | Not given                                         | Restricted social network for boys 11-18 years with severe haemophilia. Will include games and other features to promote sharing of self management skills.                                                                                                                                                                                                                                                            |                                                                                                                                                                                                                                                                                                                              |
| 40 | Khair K, et al. The role of social networking in haemophilia management. Haemophilia. 2010;4):129-130.                                                                                                                                                                                       | 2010 | UK              | Haemophilia                              | hiFive                                              | Research           | Conference abstract | Adherence to treatment difficult for adolescent boys with severe haemophilia                                                | Parental influence lessens. Potential for peer to peer transmission of self management skills                                                      | social platform | Not given                                         | hiFive - small group for 11-19 year olds living with severe haemophilia. Closed to parents.                                                                                                                                                                                                                                                                                                                            |                                                                                                                                                                                                                                                                                                                              |
| 41 | Kirk S, Milnes L. An exploration of how young people and parents use online support in the context of living with cystic fibrosis. Health expectations. 2016;19(2):309-321.                                                                                                                  | 2016 | UK              | Cystic fibrosis                          | Online forum for people with CF                     | Research           | Journal article     | Can be hard to find information and support for people with a rare disease or caring for a child with a rare disease        |                                                                                                                                                    | social platform | Not given                                         | Participants exchanged experientially derived advice and views on how to manage treatments, emotions, relationships, identity and support from services. While parents sought information and support on managing specific therapies/services and ways of maintaining their child's health, the information and support young people desired appeared to be more directed at how to 'fit' CF into their everyday lives | Online support groups appear to supplement professional support in relation to self-management. They enable young people and parents to share experiences, feelings and strategies for living with long-term conditions with peers and develop the expertise to empower them in interactions with health-care professionals. |
| 42 | Kühnle L, et al. Development of a Social Network for People Without a Diagnosis (RarePairs): Evaluation Study. J Med Internet Res. 2020;22(9):e21849                                                                                                                                         | 2020 | Germany         | Undiagnosed rare diseases                | RarePairs                                           | Research           | Journal article     | Diagnostic delay is a regular feature of rare diseases                                                                      | Diagnosis can be difficult with limited information and experience of rare diseases. This uses information from a database of 973 diagnosed people | social platform | German, English, Chinese, Portuguese, and Finnish | Social network platform with built in algorithm to match individuals with similar disease burden in the lead up to diagnosis.                                                                                                                                                                                                                                                                                          |                                                                                                                                                                                                                                                                                                                              |

|    | A                                                                                                                                                                                             | B    | C            | D                                  | E                                                                     | F                    | G                   | H                                                                                                      | I                                                                                                                                                                   | J               | K               | L                                                                                                                                                                                                                                                                                                                                                                                                                                  | M                                                                                                                                                      |
|----|-----------------------------------------------------------------------------------------------------------------------------------------------------------------------------------------------|------|--------------|------------------------------------|-----------------------------------------------------------------------|----------------------|---------------------|--------------------------------------------------------------------------------------------------------|---------------------------------------------------------------------------------------------------------------------------------------------------------------------|-----------------|-----------------|------------------------------------------------------------------------------------------------------------------------------------------------------------------------------------------------------------------------------------------------------------------------------------------------------------------------------------------------------------------------------------------------------------------------------------|--------------------------------------------------------------------------------------------------------------------------------------------------------|
| 43 | Lassandro G, et al. EMO.TI.ON.: Technologies for the safety of children with hemophilia. Blood Transfusion; November 2017, p. s539.                                                           | 2017 | Italy        | Haemophilia                        | EMO.TI.ON. system                                                     | Research             | Conference abstract | Home care decreasing reliance on hospital                                                              | Diagnosing suspected bleeds into joints requiring hospital visit for diagnosis                                                                                      | telehealth      | Not given       | an ultrasound diagnostic solution using at home by parents or caregivers. Moreover, the system can transfer, live, images by world wide web to specialist physician creating a network. The solution will be achieved by attending the design related to familiarization processes. Other function of the system are: teleconsulting tools, semantic scientific search, recording data (i.e. clinical chart, infusional diary...). | Ongoing trial but results of parent use comparable to HCP use.                                                                                         |
| 44 | Lee Yeong J, et al. A Newly Developed Web-Based Resource on Genetic Eye Disorders for Users With Visual Impairment (Gene.Vision): Usability Study. J Med Internet Res. 2021;23(1):e19151.     | 2021 | UK (England) | Genetic eye disorders              | Gene.Vision                                                           | Research             | Journal article     | Educational web-based materials need to be accessible by people with low vision                        |                                                                                                                                                                     | website passive | Not given       | Gene.vision web site on genetic eye disorders optimised for people with vision problems                                                                                                                                                                                                                                                                                                                                            |                                                                                                                                                        |
| 45 | Lewis T. Improving quality of life in patients with cystic fibrosis with exercise: CF foundation impact grant update. Conference Abstract presented at Pediatric Pulmonology; October, 2019.  | 2019 | USA          | Cystic fibrosis                    | Exercise program via App                                              | Research             | Conference abstract | Require tailored exercise program in isolation                                                         | Deliver an at home exercise program to people with CF - indirect supervision by exercise physiologist.                                                              | App             | English         | Guided exercise program (3 levels to choose from) and assessment tasks. Supported by live recorded discussions and Q and A sessions.                                                                                                                                                                                                                                                                                               | Suggests it is feasible and could lead to improvements in QoL.                                                                                         |
| 46 | Lomotey RK, et al. Mobile self-management guide for young men with mild hemophilia in cases of minor injuries. Network Modeling Analysis in Health Informatics and Bioinformatics. 2014;3(1). | 2014 | Canada       | Haemophilia                        | Hemophilia Injury Recognition Tool ("HIRT?")                          | limited availability | Journal article     | Patients may be slow to recognise injuries if their disease is mild                                    | People with mild haemophilia may only experience bleeds after a significant injury and so not recognise sequelae of milder events - not seek appropriate treatment. | App             | English, French | Structured assessment of suspected bleeds plus appropriate first-aid if needed. If more help required, phone number of all Haemophilia Treatment Centres in Canada are given to enquire about further management.                                                                                                                                                                                                                  | High usability for all users whether tech savvy or not.                                                                                                |
| 47 | Manu-Pereira MM, et al. ENERCA: Towards a European Reference Network (ERN) in rare haematological diseases. British Journal of Haematology. 2016;173(Supplement 1):39-40.                     | 2016 | Europe       | Rare and Congenital Anaemias       | e-ENERCA (European Network for Rare and Congenital Anaemias (ENERCA)) | Research             | Conference abstract | Distance from specialist centres, lack of relevant information and need to share data with expert HCP. | European reference Networks - hub and spoke model for rare disease care                                                                                             | website active  | Not given       | 3 separate platforms linked to the e-ENERCA website 1) e-Registry, a Pan European registry of RAs for epidemiological surveillance 2) e-Learning for the dissemination of knowledge, continuous medical education, and best practices awareness, and 3) Telemedicine, a platform to provide expertise, at distance, for complex cases.                                                                                             |                                                                                                                                                        |
| 48 | Moon H, Moon J. Comparative readability analysis of information on exercise for hemophilia patients. Haemophilia. 2021;27(SUPPL 2):57.                                                        | 2021 | South Korea  | Haemophilia                        | Existing online exercise programs for Haemophilia                     | publicly available   | Conference abstract | Tailored online exercise programs need to be understandable.                                           | Readability and other access features not always present                                                                                                            | website passive | Not given       | Existing web-based resources                                                                                                                                                                                                                                                                                                                                                                                                       | Sites had higher than recommended readability scores and came low down in search algorithm rankings making them hard to find.                          |
| 49 | Naik H, et al. Experience with a pilot skype internet support group for symptomatic patients with acute intermittent porphyria. Clinical Chemistry and Laboratory Medicine. 2013;51(5):eA10.  | 2013 | USA          | Acute Intermittent Porphyria (AIP) | Skype support group mediated by HCPs                                  | Research             | Conference abstract | Psychosocial and emotional isolation leading to poor mental health in this group                       | Life-threatening acute episodes - painful with sequelae - chronic symptoms. Poorly understood psychosocial needs.                                                   | social platform | Not given       | Skype support group mediated by a porphyria expert physician, and the genetic counselor/coordinator of the porphyria clinic and an available psychologist with 4 women with AIP.                                                                                                                                                                                                                                                   | Participants reported that this was a very comforting experience, reducing the feeling of isolation and increasing their understanding of the disease. |



|    | A                                                                                                                                                                                                                                                        | B    | C       | D                                                                            | E                                                                                                                                        | F                    | G                   | H                                                                                                                                                                               | I                                                                                                                                                                                                                                                                                                                                                                                                                                                                                                                  | J                                                                                                                        | K                           | L                                                                                                                                                                                                                                                                                                                                                                                                                                                                                                                                                                                       | M                                                                                                                                                                                                                         |                                                                                                    |
|----|----------------------------------------------------------------------------------------------------------------------------------------------------------------------------------------------------------------------------------------------------------|------|---------|------------------------------------------------------------------------------|------------------------------------------------------------------------------------------------------------------------------------------|----------------------|---------------------|---------------------------------------------------------------------------------------------------------------------------------------------------------------------------------|--------------------------------------------------------------------------------------------------------------------------------------------------------------------------------------------------------------------------------------------------------------------------------------------------------------------------------------------------------------------------------------------------------------------------------------------------------------------------------------------------------------------|--------------------------------------------------------------------------------------------------------------------------|-----------------------------|-----------------------------------------------------------------------------------------------------------------------------------------------------------------------------------------------------------------------------------------------------------------------------------------------------------------------------------------------------------------------------------------------------------------------------------------------------------------------------------------------------------------------------------------------------------------------------------------|---------------------------------------------------------------------------------------------------------------------------------------------------------------------------------------------------------------------------|----------------------------------------------------------------------------------------------------|
| 50 | Nicholl H, et al. Internet Use by Parents of Children With Rare Conditions: Findings From a Study on Parents' Web Information Needs. <i>J Med Internet Res</i> . 2017;19(2):e51.                                                                         | 2017 | Ireland | Rare diseases                                                                | Hypothetical                                                                                                                             | publicly available   | Journal article     | Recommendations for a consumer facing website                                                                                                                                   | <ul style="list-style-type: none"> <li>The content needs to be relevant, accurate, trustworthy, and up to date.</li> <li>The topics most frequently searched for (Table 5) need to be addressed.</li> <li>It should contain a Web-based forum or a social network component.</li> <li>The website should be integrated with social media and be mobile friendly.</li> </ul>                                                                                                                                        | other                                                                                                                    |                             |                                                                                                                                                                                                                                                                                                                                                                                                                                                                                                                                                                                         |                                                                                                                                                                                                                           |                                                                                                    |
| 51 | Nilson J, et al. Are you HIRT? (Hemophilia Injury Recognition Tool): Perceptions of the mobile app on injury self-management from young men with mild hemophilia in Canada. Conference Abstract presented at Haemophilia; July, 2016.                    | 2016 | Canada  | Haemophilia                                                                  | Hemophilia Injury Recognition Tool ("HIRT?")                                                                                             | limited availability | Conference abstract | Patients may be slow to recognise injuries if their disease is mild                                                                                                             | People with mild haemophilia may only experience bleeds after a significant injury and so not recognise sequelae of milder events - not seek appropriate treatment.                                                                                                                                                                                                                                                                                                                                                | App                                                                                                                      | English, French             | Structured assessment of suspected bleeds plus appropriate first-aid if needed. If more help required, phone number of all Haemophilia Treatment Centres in Canada are given to enquire about further management.                                                                                                                                                                                                                                                                                                                                                                       | Increased confidence dealing with injuries but no change in self management                                                                                                                                               |                                                                                                    |
| 52 | Osara Y, et al. Development of newborn screening connect (NBS connect): a self-reported patient registry and its role in improvement of care for patients with inherited metabolic disorders. <i>Orphanet Journal Of Rare Diseases</i> . 2017;12(1):132. | 2017 | USA     | Phenylketonuria (PKU), maple syrup urine disease (MSUD) or tyrosinemia (TYR) | Newborn Screening Connect (NBS Connect)                                                                                                  |                      | Research            | Journal article                                                                                                                                                                 | Patients/carers isolated by rareness of disease.                                                                                                                                                                                                                                                                                                                                                                                                                                                                   | Linking patients/carers with information. Registries are generating useful data and contributing to the research agenda. | website active              | Not given                                                                                                                                                                                                                                                                                                                                                                                                                                                                                                                                                                               | Registry - patient initiated and enters data. Resources such as education materials, information on the latest research and clinical trials, recipes, interactive health tracking systems, and professional support tools |                                                                                                    |
| 53 | Paglalanga A, et al. eHealth for patients with rare diseases: the eHealth Working Group of the European Reference Network on Rare Multisystemic Vascular Diseases (VASCERN). <i>Orphanet Journal of Rare Diseases</i> . 2021;16(1):164.                  | 2021 | Europe  | Rare Multisystemic Vascular Diseases                                         | Mobile app developed by VASCERN (European Reference Network on Rare Multisystemic Vascular Diseases); Pills of Knowledge YouTube channel | limited availability | Journal article     | (1) Finding a suitable expert; (2) finding a patient support agency; (3) need for timely info about the patient in an emergency situation; (4) information needs of the patient | (1) In Europe can mean travelling across borders, languages - incurring time and money. Difficult to find appropriate RD expert. This RD is multisystem so may need several specialists; (2) Not always named after your disease / group of diseases (3) Paper records carried by the patient are common but may be lost and can only contain a limited amount of information; (4) High quality and easy to understand - combining patient and carer needs, HCP expertise and patient advocacy agency perspectives | App                                                                                                                      | Multiple European languages | However, further research is needed as digital patient passports may also pose new challenges, for example in terms of data management, patient privacy, informed consent, and control of shared data. In addition, digital passports may not necessarily fit the needs of every patient with the disease as, for example, people with limited digital skills and people not willing to use a smartphone to handle clinical issues might still prefer to use conventional paper documents. Issues about confidentiality and ethical rules in various EU countries, remain to be solved. |                                                                                                                                                                                                                           |                                                                                                    |
| 54 | Parrott H, et al. A digital solution for virtual consultation and sharing health data in adults with cystic fibrosis. <i>Journal of Cystic Fibrosis</i> . 2019;18(Supplement 1):S51                                                                      | 2019 | UK      | Cystic fibrosis                                                              | Virtual consults and remote monitoring                                                                                                   |                      | Research            | Conference abstract                                                                                                                                                             | Frequent clinic visits are having a huge impact on the quality of life.                                                                                                                                                                                                                                                                                                                                                                                                                                            | Also growing cohort of patients as they are living longer - concerns about Health system capacity                        | telehealth                  | Not given                                                                                                                                                                                                                                                                                                                                                                                                                                                                                                                                                                               | Virtual clinics and spirometry done by patients at home                                                                                                                                                                   | Considerable savings of time for both patients and clinicians. So far no issues. Patients like it. |
| 55 | Polineni D, et al. A stakeholder-informed feasibility study of tele-coaching to improve treatment adherence in patients with cystic fibrosis. <i>Pediatric Pulmonology</i> . 2017;52(Supplement 47):479.                                                 | 2017 | USA     | Cystic fibrosis                                                              | Tele-coaching                                                                                                                            |                      | Research            | Conference abstract                                                                                                                                                             | Adherence to treatment not optimal                                                                                                                                                                                                                                                                                                                                                                                                                                                                                 | Proposed intervention= tele-coaching                                                                                     | telehealth                  |                                                                                                                                                                                                                                                                                                                                                                                                                                                                                                                                                                                         |                                                                                                                                                                                                                           |                                                                                                    |

|    | A                                                                                                                                                                                                                                                  | B    | C                    | D                                | E                                               | F                  | G                   | H                                                                                        | I                                                                                                                                                                                                                                                                                           | J               | K            | L                                                                                                                                                                                                                         | M                                                                                                                                                                                                                                                                                                                                                                                                                                                                                                                                                                                                                                                                                                                                                                                                                                                                                                                                                                                                                                                                                      |
|----|----------------------------------------------------------------------------------------------------------------------------------------------------------------------------------------------------------------------------------------------------|------|----------------------|----------------------------------|-------------------------------------------------|--------------------|---------------------|------------------------------------------------------------------------------------------|---------------------------------------------------------------------------------------------------------------------------------------------------------------------------------------------------------------------------------------------------------------------------------------------|-----------------|--------------|---------------------------------------------------------------------------------------------------------------------------------------------------------------------------------------------------------------------------|----------------------------------------------------------------------------------------------------------------------------------------------------------------------------------------------------------------------------------------------------------------------------------------------------------------------------------------------------------------------------------------------------------------------------------------------------------------------------------------------------------------------------------------------------------------------------------------------------------------------------------------------------------------------------------------------------------------------------------------------------------------------------------------------------------------------------------------------------------------------------------------------------------------------------------------------------------------------------------------------------------------------------------------------------------------------------------------|
| 56 | Richesson RL, et al. An automated communication system in a contact registry for persons with rare diseases: Scalable tools for identifying and recruiting clinical research participants. <i>Contemporary Clinical Trials</i> . 2009;30(1):55-62. | 2009 | USA                  | Rare diseases                    | Notifications of relevant new research projects | Research           | Journal article     | Patients have a lack of access to new trials; Researchers - hard to recruit patients     | All related to rarity of the conditions                                                                                                                                                                                                                                                     | website passive | Not given    | web-based automated system generates periodic and customized communications to notify registrants of relevant studies in the NIH Rare Diseases Clinical Research Network (RDCRN).                                         |                                                                                                                                                                                                                                                                                                                                                                                                                                                                                                                                                                                                                                                                                                                                                                                                                                                                                                                                                                                                                                                                                        |
| 57 | Rits S, et al. Weekly patient webcasts: An adult CF center's response to the COVID-19 pandemic. Conference Abstract presented at Pediatric Pulmonology, October, 2020.                                                                             | 2020 | USA                  | Cystic fibrosis                  | Webcasts on COVID                               | publicly available | Conference abstract | Urgent need for disease specific information during COVID pandemic                       | Plenty of information for the general public but not for people with a rare disease. Concerns from people with CF adequate infection control, access to care, medications and supplies, clinical outcomes as they relate to CF, employment status and disability, and overall mental health | other           | Not given    | Weekly webcasts on COVID made available Could ask questions through Google form. Email notification out to patients and carers.                                                                                           |                                                                                                                                                                                                                                                                                                                                                                                                                                                                                                                                                                                                                                                                                                                                                                                                                                                                                                                                                                                                                                                                                        |
| 58 | Rodman J, et al. Patient perspectives on electronic access to registry health records: An Irish-Slovene online survey. <i>Journal of Cystic Fibrosis</i> . 2016;15(Supplement 1):S36.                                                              | 2016 | Ireland and Slovenia | Cystic fibrosis                  | European CF Registry                            | Research           | Conference abstract | Lack of patient access to their own medical records                                      | Thought to be useful for self management                                                                                                                                                                                                                                                    | website active  | Not given    | Hypothetical access to the Register                                                                                                                                                                                       | Patients in favour of it but concerned about security                                                                                                                                                                                                                                                                                                                                                                                                                                                                                                                                                                                                                                                                                                                                                                                                                                                                                                                                                                                                                                  |
| 59 | Rudolf I, et al. Assessment of a Mobile App by Adolescents and Young Adults With Cystic Fibrosis: Pilot Evaluation. <i>JMIR mHealth and uHealth</i> . 2019;7(11):e12442.                                                                           | 2019 | Germany              | Cystic fibrosis                  | Kinderhilfe Organtransplantation (KIOAPP)       | publicly available | Journal article     | Lung function decline in transition from 12 and 24 years.                                | Improving self management and independence from parents important for ongoing outcomes. Poor self management only slowly manifests itself.                                                                                                                                                  | App             | ?German      | App contains a diary function for recording vital signs and personal observations, communication platform for sending information to the HCP, a medication plan, and medication reminder function. Age appropriate format | Perceived as useful and supportive overall. Most useful feature was the medication plan and reminders. Diary use became less frequent quickly at odds with its high usefulness rating.                                                                                                                                                                                                                                                                                                                                                                                                                                                                                                                                                                                                                                                                                                                                                                                                                                                                                                 |
| 60 | Ruther DF, et al. Mobile app requirements for patients with rare liver diseases: A single center survey for the ERN RARE-LIVER. <i>Clinics and Research in Hepatology and Gastroenterology</i> . 2021;45(6).                                       | 2021 | Europe               | autoimmune liver diseases (AILD) | Hypothetical                                    | Research           | Journal article     | Research into what consumers want in a Rare Liver disorder app                           |                                                                                                                                                                                                                                                                                             | App             | Not reported | Hypothetical                                                                                                                                                                                                              | A substantial majority of patients expected to benefit from the app due to constant access to health data (81%), better overview of the course of the disease (80%), better understanding of the disease (70%) and faster detection of drug side effects (64%). only the minority of patients believed that an app could help to improve quality of life (21%), reduce fears associated with the disease (24%), reduce mistakes in taking medication (32%) or improve medication adherence (37%) (Fig. 3). Significantly desired features were information on new developments (93%), access to one's own medical records (89%), notifications to practitioner in case of concerns (84%), automatic ordering of follow-up prescriptions (81%), information on clinical trials (79%), disease information (79%) and recording of health concerns with symptom trackers (73%). In contrast, significantly undesired features were gamification or reward system (5%), networking (27%) and comparisons (35%) with other persons affected (Fig. 3). Did not all match with HCP responses. |
| 61 | Sottilotta G, et al. The HEMONLINE project: Preliminary results. <i>Haemophilia</i> . 2012;3:77.                                                                                                                                                   | 2012 | Italy                | Haemophilia                      | HEMONLINE                                       | Research           | Conference abstract | Distance to treatment centre burdensome and results in expenses including loss of wages. |                                                                                                                                                                                                                                                                                             | telehealth      | Not given    | Web-cam and internet connection provided to patients to allow them to contact HCPs in addition to in person home visits by the MDT                                                                                        | In progress but suggests better use of health services and patient satisfaction                                                                                                                                                                                                                                                                                                                                                                                                                                                                                                                                                                                                                                                                                                                                                                                                                                                                                                                                                                                                        |

|    | A                                                                                                                                                                                                                                                                                         | B    | C                   | D                                     | E                                      | F                    | G                   | H                                                                                                                                    | I                                                                                                                                                                                                                                                                                                                                    | J               | K                 | L                                                                                                                                                                                                                                                                                                                                                                  | M                                                             |
|----|-------------------------------------------------------------------------------------------------------------------------------------------------------------------------------------------------------------------------------------------------------------------------------------------|------|---------------------|---------------------------------------|----------------------------------------|----------------------|---------------------|--------------------------------------------------------------------------------------------------------------------------------------|--------------------------------------------------------------------------------------------------------------------------------------------------------------------------------------------------------------------------------------------------------------------------------------------------------------------------------------|-----------------|-------------------|--------------------------------------------------------------------------------------------------------------------------------------------------------------------------------------------------------------------------------------------------------------------------------------------------------------------------------------------------------------------|---------------------------------------------------------------|
| 62 | Stevenson Won A, et al. Assessing the Feasibility of an Open-Source Virtual Reality Mirror Visual Feedback Module for Complex Regional Pain Syndrome: Pilot Usability Study. <i>J Med Internet Res.</i> 2021;23(5):e16536.                                                                | 2021 | USA                 | Complex regional pain syndrome (CRPS) | Virtual Reality Visual Feedback Module | Research             | Journal article     | Few treatment options for CRPS.                                                                                                      | Mirror visual feedback therapies promising. Can be delivered using VR but costly and not so far popular. Now cheaper and HCPs developing skills to deliver it                                                                                                                                                                        | Website active  | Not reported      | HCP led VR sessions in a clinic with a view to extending it to home use. Provides therapy platform and information.                                                                                                                                                                                                                                                | Did not improve pain but usability, feasibility and all good. |
| 63 | Storf H,et al. Vision and challenges of a cartographic representation of expert medical centres for rare diseases. <i>Studies in health technology and informatics.</i> 2014;205:677-81.                                                                                                  | 2014 | Germany             | Rare diseases                         | se-atlas                               | Research             | Journal article     | Difficult for people with rare diseases to find appropriate specialist centre in Germany                                             |                                                                                                                                                                                                                                                                                                                                      | website active  | Not given         | Interactive map and list                                                                                                                                                                                                                                                                                                                                           |                                                               |
| 64 | Timmer AM, et al. A Blended Physiotherapy Intervention for Persons With Hemophilic Arthropathy: Development Study. <i>J Med Internet Res.</i> 2020;22(6):e16631.                                                                                                                          | 2020 | Netherlands         | Haemophilia                           | e-Exercise HA                          | Research             | Journal article     | Few PTs understand haemophilic arthropathy and so access to one is difficult for this common complication; Cost of specialist physio | most critical barriers to adhering to physiotherapy were the limited reimbursement by the health insurance, execution of boring exercises, and stubbornness of the patients to accept advice. The patients mentioned that a good relationship with their physiotherapist facilitated their adherence to the physiotherapy treatment. | website active  | Not given         | A 12-week blended intervention was developed, integrating face-to-face physiotherapy sessions with a web-based app. The intervention consists of information modules for persons with HA and information modules for physiotherapists, a graded activity program using a self-chosen activity, and personalized video-supported exercises. The information modules |                                                               |
| 65 | Verkleij M, et al. Development and evaluation of an internet-based cognitive behavioral therapy intervention for anxiety and depression in adults with cystic fibrosis (eHealth CF-CBT): An international collaboration. <i>Internet Interventions.</i> 2021;24.                          | 2021 | Netherlands         | Cystic fibrosis                       | eHealth CF-CBT                         | Research             | Journal article     | Anxiety and depression in people with CF common and can affect adherence, health and QoL                                             | Access to evidence-based mental health care can be limited adding to the cost and burden of care for people with CF.                                                                                                                                                                                                                 | website active  | English and Dutch | Internet delivered CBT sessions guided by a therapist. Trialled with 16 people with CF                                                                                                                                                                                                                                                                             | high levels of acceptability and usability                    |
| 66 | Verkleij M, et al. Development of a therapist-guided internet-delivered cognitive behavioral therapy intervention for anxiety and depression in adults with cystic fibrosis (e-Health CF-CBT): An international collaboration. <i>Pediatric Pulmonology.</i> 2019;54(Supplement 2):406-7. | 2019 | Netherlands         | Cystic fibrosis                       | eHealth CF-CBT                         | Research             | Conference abstract | Anxiety and depression in people with CF common and can affect adherence, health and QoL                                             | Access to evidence-based mental health care can be limited adding to the cost and burden of care for people with CF.                                                                                                                                                                                                                 | website active  | English and Dutch | Pilot Internet delivered CBT sessions guided by a therapist                                                                                                                                                                                                                                                                                                        |                                                               |
| 67 | Verkleij M,et al. Development and evaluation of an internet-based cognitive behavioral therapy intervention for anxiety and depression in adults with cystic fibrosis: An international collaboration. <i>Pediatric Pulmonology.</i> 2020;55(SUPPL 2):267.                                | 2020 | Netherlands         | Cystic fibrosis                       | eHealth CF-CBT                         | Research             | Conference abstract | Anxiety and depression in people with CF common and can affect adherence, health and QoL                                             | Access to evidence-based mental health care can be limited adding to the cost and burden of care for people with CF.                                                                                                                                                                                                                 | website active  | English and Dutch | Internet delivered CBT sessions guided by a therapist. Trialled with 16 people with CF                                                                                                                                                                                                                                                                             | High levels of acceptability and usability                    |
| 68 | Wagner B,et al. Establishing an online physical exercise program for people with hemophilia. <i>Wiener Klinische Wochenschrift.</i> 2019;131(21-22):558-66.                                                                                                                               | 2019 | Germany and Austria | Haemophilia                           | online exercise program                | limited availability | Journal article     | Distance to attend exercise program at the specialist centre not feasible                                                            |                                                                                                                                                                                                                                                                                                                                      | website passive | Not given         | Online exercise lessons for adults and young people conducted by physician. Also have consultation hours (? Online) when you can speak to someone at the clinic about the program)                                                                                                                                                                                 |                                                               |

|    | A                                                                                                                                                                                                                                | B    | C         | D                              | E                                                       | F                  | G               | H                                                                                         | I                                                                          | J               | K            | L                                                                                                                                                                                                                    | M                                                                                                                                                                                                                                                                                                                                                                                                                                                                                                                                                                                       |
|----|----------------------------------------------------------------------------------------------------------------------------------------------------------------------------------------------------------------------------------|------|-----------|--------------------------------|---------------------------------------------------------|--------------------|-----------------|-------------------------------------------------------------------------------------------|----------------------------------------------------------------------------|-----------------|--------------|----------------------------------------------------------------------------------------------------------------------------------------------------------------------------------------------------------------------|-----------------------------------------------------------------------------------------------------------------------------------------------------------------------------------------------------------------------------------------------------------------------------------------------------------------------------------------------------------------------------------------------------------------------------------------------------------------------------------------------------------------------------------------------------------------------------------------|
| 69 | Walker KK. Cognitive and affective uses of a Thoracic Outlet Syndrome Facebook support group. 2014                                                                                                                               | 2014 | USA       | Thoracic Outlet Syndrome (TOS) | Thoracic Outlet Syndrome (TOS) Awareness Facebook group | publicly available | Journal article | Finding reliable information difficult for people with a rare disease                     | HCPs may not be knowledgeable. Support from peers difficult due to rarity. | social platform | Not given    | Facebook group for people with TOS                                                                                                                                                                                   | Analysis of cognitive needs indicated TOS patients used the site more to share information about their own TOS symptoms and journey with diagnosis than to seek information. Analysis of affective needs found patients were more likely to use the site to give support and encouragement to others than to express concerns and complaints. The complaints they did express were primarily related to their frustration with the general medical community's perceived inability to diagnose and understand their disease or to question a specific doctor's diagnosis/recommendation |
| 70 | Wittmeier K, et al. Analysis of a Parent-Initiated Social Media Campaign for Hirschsprung's Disease. J Med Internet Res. 2014;16(12):e288.                                                                                       | 2014 | Canada    | Hirschsprung's Disease         | Social media campaign "Shit happens"                    | publicly available | Journal article | Families of children with rare diseases can feel isolated and unsupported                 |                                                                            | social platform | English      | Social media campaign to raise awareness and provide support for families dealing with Hirschsprung's disease. Facebook, Twitter, Blog posts and question and answer style postings. Very engaging for the community | Analytics showed 5400 views of the blog from 37 countries. Across platforms - within 2 hours of posting a question could get 143 views, 20 responses increasing to 30 responses within 5 hours.                                                                                                                                                                                                                                                                                                                                                                                         |
| 71 | Wood J, et al. A smartphone application for reporting symptoms in adults with cystic fibrosis improves the detection of exacerbations: Results of a randomised controlled trial. Journal of Cystic Fibrosis. 2020;19(2):271-276. | 2020 | Australia | Cystic fibrosis                | Not given                                               | Research           | Journal article | Delayed reporting of symptoms can result in more severe exacerbations and worse outcomes. |                                                                            | App             | Not reported | 12 questions re symptoms associated with exacerbation that alert a nurse if respondents answer yes.                                                                                                                  | No change in IV antibiotic use. Number of courses of oral antibiotics increased and the median (IQR) time to detection of exacerbation requiring oral or IV antibiotics was shorter in the intervention group compared with the control group. No detectable change in lung function.                                                                                                                                                                                                                                                                                                   |
| 72 | Wood J, et al. High usability of a smartphone application for reporting symptoms in adults with cystic fibrosis. J Telemed Telecare. 2018;24(8):547-552.                                                                         | 2018 | Australia | Cystic fibrosis                | Not given                                               | Research           | Journal article | Delayed reporting of symptoms can result in more severe exacerbations and worse outcomes. |                                                                            | App             | Not reported | 12 questions re symptoms associated with exacerbation that alert a nurse if respondents answer yes.                                                                                                                  | Study looked at HCP response to the app questions using 45 clinical scenarios. Excellent usability and near-perfect agreement interpreting the app responses.                                                                                                                                                                                                                                                                                                                                                                                                                           |
